# Supplementary material for: Efficient synthesis of 1,2-benzisothiazoles from o-haloarylamidines and elemental sulfur via N–S/C–S bond formation under transition-metal-free conditions
Source: Royal Society of Chemistry journal article supplement (doi:10.1039/c7gc03599c), 2018-01-01

## Supporting Information

### Efficient synthesis of 1,2-benzisothiazoles from *o*-haloarylamidines and elemental sulfur *via* N-S/C-S bond formation under transition-metal-free conditions

Hao Xie,<sup>a</sup> Guozheng Li,<sup>a</sup> Feng Zhang,<sup>b,\*</sup> Fuhong Xiao,<sup>a</sup> and Guo-Jun Deng<sup>a,\*</sup>

<sup>a</sup> Key Laboratory for Green Organic Synthesis and Application of Hunan Province, Key Laboratory of Environmentally Friendly Chemistry and Application of Ministry of Education, College of Chemistry, Xiangtan University, Xiangtan 411105, China. E-mail: zhangf@iccas.ac.cn; gjdeng@xtu.edu.cn

<sup>b</sup> College of Science, Hunan Agricultural University, Changsha, 410128, China.

#### List of Contents

|                                                                    |     |
|--------------------------------------------------------------------|-----|
| 1. General information-----                                        | S2  |
| 2. General procedure for substrate preparation-----                | S2  |
| 3. General procedure for reaction-----                             | S2  |
| 4. Characterization data of products-----                          | S3  |
| 5. Reference-----                                                  | S19 |
| 6. <sup>1</sup> H and <sup>13</sup> C NMR spectra of products----- | S20 |

## 1. General information:

All reactions were carried out under an atmosphere of air unless otherwise noted. Column chromatography was performed using silica gel (200-300 mesh).  $^1\text{H}$  NMR and  $^{13}\text{C}$  NMR spectra were recorded on Bruker-AV (400 and 100 MHz, respectively) instrument internally referenced to tetramethylsilane (TMS) or chloroform signals. Mass spectra were measured on Agilent 5975 GC-MS instrument (EI). High-resolution mass spectra were recorded at Jiangxi University of Traditional Chinese Medicine. The structures of known compounds were further corroborated by comparing their  $^1\text{H}$  NMR,  $^{13}\text{C}$  NMR data and MS data with those of literature. Reagents were used as received or prepared by our laboratory.

## 2. General procedures for the synthesis of *o*-halo amidines <sup>[1]</sup>

A round bottom flask (100 mL) equipped with a stir bar was charged with NaH (264 mg, 11.0 mmol, 95%, 1.10 equiv) under argon atmosphere. Under a balloon of argon, DMSO (5 mL) was added, and the resulting suspension cooled with an ice-water bath prior to the addition of aniline (12.0 mmol, 1.20 equiv) and *o*-halo carbonitrile (10.0 mmol). The mixture was kept at 0 °C for 30-60 min and then stirred for the indicated time at room temperature. The septum was removed, and ice-water (50 mL) was added while maintaining vigorous stirring. In the cases, when the amidine precipitated upon addition of water, the solid was filtered off and dissolved in EtOAc (20 mL). In all other cases, the aqueous layer was extracted with EtOAc (3 × 20 mL). The extracts were combined and washed with water (2 × 50 mL). In both of the aforementioned cases, the organic layer was dried over  $\text{Na}_2\text{SO}_4$ , filtered, and concentrated under reduced pressure. The residue was either purified by silica gel chromatography or recrystallization.

## 3. General procedure for reaction: (2a):

A 10 mL oven-dried reaction vessel was charged with 2-chloro-*N*-phenylbenzimidamide (**1a**, 46 mg, 0.2 mmol), S (32 mg, 1.0 mmol), potassium phosphate tribasic trihydrate (107 mg, 0.4 mmol), PhMe (0.4 mL) and DMSO (0.2 mL) under air. The reaction vessel was stirred at 135 °C for 36 h. After cooling to room temperature, the volatiles were removed under reduced pressure. The residue was purified by column chromatography on silica gel (petroleum ether/ethyl acetate = 20:1) to yield the desired product **2a** as off-white solid, 37.0 mg, yield 83%.

#### 4. Characterization data of products

##### 2-Chloro-*N*-phenylbenzimidamide (**2a**)

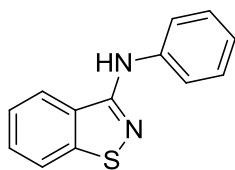

$^1\text{H}$  NMR (400 MHz, DMSO- $d_6$ , ppm)  $\delta$  9.60 (s, 1H), 8.49 (d,  $J$  = 8.1 Hz, 1H), 8.06 (d,  $J$  = 8.1 Hz, 1H), 7.96 (d,  $J$  = 7.7 Hz, 2H), 7.60 (t,  $J$  = 7.5 Hz, 1H), 7.51 (t,  $J$  = 7.5 Hz, 1H), 7.34 (t,  $J$  = 8.0 Hz, 2H), 6.97 (t,  $J$  = 7.3 Hz, 1H);  $^{13}\text{C}$  NMR (100 MHz, DMSO- $d_6$ , ppm)  $\delta$  155.3, 149.9, 141.3, 128.8, 128.5, 127.5, 124.5, 122.8, 121.4, 120.6, 117.9; HRMS calcd. for:  $\text{C}_{13}\text{H}_{11}\text{N}_2\text{S}$   $[\text{M}+\text{H}]^+$  227.0638, found 227.0636.

##### *N*-(*p*-Tolyl)benzo[d]isothiazol-3-amine (**2b**)

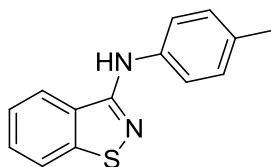

2-Chloro-*N*-(*p*-tolyl)benzimidamide (**1b**, 48.8 mg, 0.2 mmol) was used as the substrate under the given reaction conditions. The residue was purified by column chromatography (silica gel, petroleum ether/ethyl acetate = 20:1) to give **2b** as brown solid, 30.2 mg, yield 63%.

$^1\text{H}$  NMR (400 MHz,  $\text{CDCl}_3$ , ppm)  $\delta$  7.83 (d,  $J$  = 8.1 Hz, 1H), 7.77 (d,  $J$  = 8.1 Hz, 1H), 7.61 (d,  $J$  = 8.3 Hz, 2H), 7.52 (t,  $J$  = 7.3 Hz, 1H), 7.40 (t,  $J$  = 7.5 Hz, 1H), 7.17 (d,  $J$  = 8.2 Hz, 2H), 6.98 (s, 1H), 2.33 (s, 3H);  $^{13}\text{C}$  NMR (100 MHz,  $\text{CDCl}_3$ , ppm)  $\delta$  154.7, 151.0, 137.7, 131.9, 129.6, 128.1, 127.0, 124.1, 120.8, 120.4, 118.5, 20.8; HRMS calcd. for:  $\text{C}_{14}\text{H}_{13}\text{N}_2\text{S}$   $[\text{M}+\text{H}]^+$  241.0794, found 241.0790.

##### *N*-(4-Ethylphenyl)benzo[d]isothiazol-3-amine (**2c**)

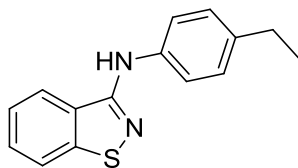

2-Chloro-*N*-(4-ethylphenyl)benzimidamide (**1c**, 51.6 mg, 0.2 mmol) was used as the substrate

under the given reaction conditions. The residue was purified by column chromatography (silica gel, petroleum ether/ethyl acetate = 20:1) to give **2c** as white solid, 36.5 mg, yield 72%.

$^1\text{H}$  NMR (400 MHz,  $\text{CDCl}_3$ , ppm)  $\delta$  7.84 (d,  $J$  = 8.1 Hz, 1H), 7.77 (d,  $J$  = 8.7 Hz, 1H), 7.64 (d,  $J$  = 8.5 Hz, 2H), 7.52 (t,  $J$  = 7.6 Hz, 1H), 7.41 (t,  $J$  = 7.6 Hz, 1H), 7.20 (d,  $J$  = 8.2 Hz, 2H), 6.98 (s, 1H), 2.64 (q,  $J$  = 7.6 Hz, 2H), 1.24 (t,  $J$  = 7.6 Hz, 3H);  $^{13}\text{C}$  NMR (100 MHz,  $\text{CDCl}_3$ , ppm)  $\delta$  154.6, 151.0, 138.4, 137.8, 128.4, 128.1, 127.0, 124.1, 120.8, 120.4, 118.5, 28.2, 15.7; HRMS calcd. for:  $\text{C}_{15}\text{H}_{15}\text{N}_2\text{S}$   $[\text{M}+\text{H}]^+$  255.0951, found 255.0949.

***N*-(4-(*tert*-Butyl)phenyl)benzo[d]isothiazol-3-amine (2d)**

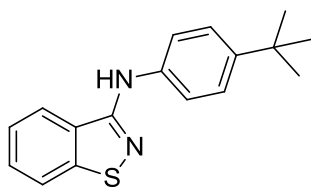

2-Chloro-*N*-(4-ethylphenyl)benzimidamide (**1d**, 57.2 mg, 0.2 mmol) was used as the substrate under the given reaction conditions. The residue was purified by column chromatography (silica gel, petroleum ether/ethyl acetate = 20:1) to give **2d** as gray solid, 53.0 mg, yield 94%.

$^1\text{H}$  NMR (400 MHz,  $\text{CDCl}_3$ , ppm)  $\delta$  7.84 (d,  $J$  = 8.1 Hz, 1H), 7.78 (d,  $J$  = 8.1 Hz, 1H), 7.65 (d,  $J$  = 8.4 Hz, 2H), 7.52 (t,  $J$  = 7.6 Hz, 1H), 7.43-7.35 (m, 3H), 6.98 (s, 1H), 1.33 (s, 9H);  $^{13}\text{C}$  NMR (100 MHz,  $\text{CDCl}_3$ , ppm)  $\delta$  154.6, 151.0, 145.3, 137.6, 128.1, 127.0, 125.9, 124.1, 120.8, 120.4, 118.1, 34.2, 31.4; HRMS calcd. for:  $\text{C}_{17}\text{H}_{19}\text{N}_2\text{S}$   $[\text{M}+\text{H}]^+$  283.1264, found 283.1264.

***N*-(4-Methoxyphenyl)benzo[d]isothiazol-3-amine (2e)**

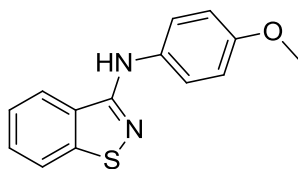

2-Chloro-*N*-(4-methoxyphenyl)benzimidamide (**1e**, 52.0 mg, 0.2 mmol) was used as the substrate under the given reaction conditions. The residue was purified by column chromatography (silica gel, petroleum ether/ethyl acetate = 20:1) to give **2e** as brown solid, 47.1 mg, yield 92%.

$^1\text{H}$  NMR (400 MHz,  $\text{CDCl}_3$ , ppm)  $\delta$  7.80 (d,  $J$  = 8.1 Hz, 1H), 7.73 (d,  $J$  = 8.1 Hz, 1H), 7.64-7.57 (m, 2H), 7.49 (t,  $J$  = 7.3 Hz, 1H), 7.36 (t,  $J$  = 7.5 Hz, 1H), 6.96-6.84 (m, 3H), 3.78 (s, 3H);  $^{13}\text{C}$

NMR (100 MHz, CDCl<sub>3</sub>, ppm)  $\delta$  155.3, 155.1, 151.0, 133.6, 128.0, 126.9, 124.0, 120.8, 120.4, 120.3, 114.3, 55.5; HRMS calcd. for: C<sub>14</sub>H<sub>13</sub>N<sub>2</sub>OS [M+H]<sup>+</sup> 257.0743, found 257.0743.

***N*-(4-Ethoxyphenyl)benzo[d]isothiazol-3-amine (2f)**

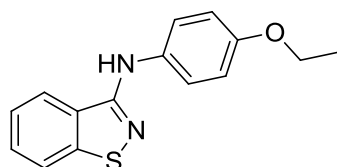

2-Chloro-*N*-(4-ethoxyphenyl)benzimidamide (**1f**, 42.8 mg, 0.2 mmol) was used as the substrate under the given reaction conditions. The residue was purified by column chromatography (silica gel, petroleum ether/ethyl acetate = 20:1) to give **2f** as gray solid, 39.4 mg, yield 73%.

<sup>1</sup>H NMR (400 MHz, CDCl<sub>3</sub>, ppm)  $\delta$  7.80 (d, *J* = 8.1 Hz, 1H), 7.72 (d, *J* = 8.1 Hz, 1H), 7.64-7.55 (m, 2H), 7.49 (t, *J* = 7.5 Hz, 1H), 7.35 (t, *J* = 7.5 Hz, 1H), 6.98-6.83 (m, 3H), 4.00 (q, *J* = 7.0 Hz, 2H), 1.39 (t, *J* = 7.0 Hz, 3H); <sup>13</sup>C NMR (100 MHz, CDCl<sub>3</sub>, ppm)  $\delta$  155.1, 154.6, 151.0, 133.5, 128.0, 126.9, 124.0, 120.9, 120.4, 120.3, 115.0, 63.7, 14.8; HRMS calcd. for: C<sub>15</sub>H<sub>15</sub>N<sub>2</sub>OS [M+H]<sup>+</sup> 271.0900, found 271.0894.

***N*-(4-(Trifluoromethoxy)phenyl)benzo[d]isothiazol-3-amine (2g)**

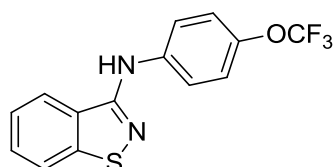

2-Chloro-*N*-(4-(trifluoromethoxy)phenyl)benzimidamide (**1g**, 62.8 mg, 0.2 mmol) was used as the substrate under the given reaction conditions. The residue was purified by column chromatography (silica gel, petroleum ether/ethyl acetate = 20:1) to give **2g** as white solid, 37.2 mg, yield 60%.

<sup>1</sup>H NMR (400 MHz, CDCl<sub>3</sub>, ppm)  $\delta$  7.84 (d, *J* = 8.1 Hz, 1H), 7.82-7.72 (m, 3H), 7.53 (t, *J* = 7.6 Hz, 1H), 7.41 (t, *J* = 7.5 Hz, 1H), 7.19 (d, *J* = 8.8 Hz, 2H), 7.07 (s, 1H); <sup>13</sup>C NMR (100 MHz, CDCl<sub>3</sub>, ppm)  $\delta$  154.0, 151.0, 143.7 (q, *J* = 1.7, 1.7 Hz), 139.0, 128.3, 126.9, 124.3, 121.9, 120.6, 120.6 (q, *J* = 254.7 Hz), 120.5, 118.9; HRMS calcd. for: C<sub>14</sub>H<sub>10</sub>F<sub>3</sub>N<sub>2</sub>OS [M+H]<sup>+</sup> 311.0461, found 311.0458.

***N*-(4-Fluorophenyl)benzo[d]isothiazol-3-amine (2h)**

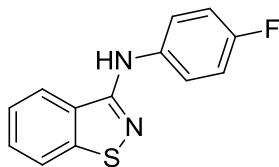

2-Chloro-*N*-(4-fluorophenyl)benzimidamide (**1h**, 50.0 mg, 0.2 mmol) was used as the substrate under the given reaction conditions. The residue was purified by column chromatography (silica gel, petroleum ether/ethyl acetate = 20:1) to give **2h** as white solid, 31.7 mg, yield 65%.

<sup>1</sup>H NMR (400 MHz, CDCl<sub>3</sub>, ppm)  $\delta$  7.85 (d,  $J$  = 8.1 Hz, 1H), 7.77 (d,  $J$  = 8.1 Hz, 1H), 7.73-7.66 (m, 2H), 7.56-7.52 (m, 1H), 7.44-7.40 (m, 1H), 7.10-7.03 (m, 2H), 6.98 (s, 1H); <sup>13</sup>C NMR (100 MHz, CDCl<sub>3</sub>, ppm)  $\delta$  158.3 (d,  $J$  = 239.6 Hz), 154.5, 151.1, 136.3 (d,  $J$  = 2.5 Hz), 128.3, 126.8, 124.3, 120.7, 120.5, 119.9 (d,  $J$  = 7.7 Hz), 115.7 (d,  $J$  = 22.3 Hz); HRMS calcd. for: C<sub>13</sub>H<sub>10</sub>FN<sub>2</sub>S [M+H]<sup>+</sup> 245.0543, found 245.0543.

***N*-(4-Chlorophenyl)benzo[d]isothiazol-3-amine (2i)**

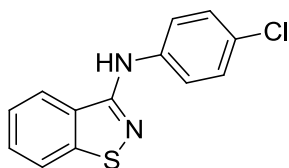

2-Chloro-*N*-(4-chlorophenyl)benzimidamide (**1i**, 52.8 mg, 0.2 mmol) was used as the substrate under the given reaction conditions. The residue was purified by column chromatography (silica gel, petroleum ether/ethyl acetate = 20:1) to give **2i** as yellow solid, 34.8 mg, yield 67%.

<sup>1</sup>H NMR (400 MHz, CDCl<sub>3</sub>, ppm)  $\delta$  7.86 (d,  $J$  = 8.1 Hz, 1H), 7.78 (d,  $J$  = 8.1 Hz, 1H), 7.71 (d,  $J$  = 8.8 Hz, 2H), 7.55 (t,  $J$  = 7.6 Hz, 1H), 7.43 (t,  $J$  = 7.5 Hz, 1H), 7.31 (d,  $J$  = 8.7 Hz, 2H), 7.07 (s, 1H); <sup>13</sup>C NMR (100 MHz, CDCl<sub>3</sub>, ppm)  $\delta$  154.0, 151.0, 138.8, 129.0, 128.3, 126.9, 126.9, 124.3, 120.7, 120.5, 119.2; HRMS calcd. for: C<sub>13</sub>H<sub>10</sub>ClN<sub>2</sub>S [M+H]<sup>+</sup> 261.0248, found 261.0244.

***N*-(4-Bromophenyl)benzo[d]isothiazol-3-amine (2j)**

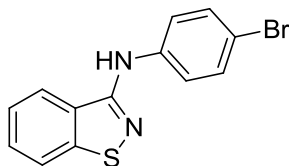

*N*-(4-Bromophenyl)-2-chlorobenzimidamide (**1j**, 61.9 mg, 0.2 mmol) was used as the substrate under the given reaction conditions. The residue was purified by column chromatography (silica gel, petroleum ether/ethyl acetate = 20:1) to give **2j** as white solid, 39.6 mg, yield 65%.

<sup>1</sup>H NMR (400 MHz, CDCl<sub>3</sub>, ppm) δ 7.85 (d, *J* = 8.1 Hz, 1H), 7.77 (d, *J* = 8.0 Hz, 1H), 7.66 (d, *J* = 7.8 Hz, 2H), 7.54 (t, *J* = 7.5 Hz, 1H), 7.48-7.38 (m, 3H), 7.01 (s, 1H); <sup>13</sup>C NMR (100 MHz, CDCl<sub>3</sub>, ppm) δ 153.9, 151.0, 139.3, 131.9, 128.3, 126.9, 124.3, 120.6, 120.5, 119.5, 114.3; HRMS calcd. for: C<sub>13</sub>H<sub>10</sub>BrN<sub>2</sub>S [M+H]<sup>+</sup> 304.9743, found 304.9746.

***N*-([1,1'-Biphenyl]-4-yl)benzo[d]isothiazol-3-amine (2k)**

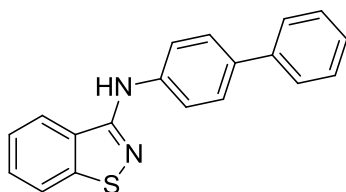

*N*-([1,1'-Biphenyl]-4-yl)-2-chlorobenzimidamide (**1k**, 61.2 mg, 0.2 mmol) was used as the substrate under the given reaction conditions. The residue was purified by column chromatography (silica gel, petroleum ether/ethyl acetate = 20:1) to give **2k** as yellow solid, 48.3 mg, yield 80%.

<sup>1</sup>H NMR (400 MHz, DMSO-*d*<sub>6</sub>, ppm) δ 9.75 (s, 1H), 8.53 (d, *J* = 8.1 Hz, 1H), 8.08 (d, *J* = 8.8 Hz, 3H), 7.70-7.67 (m, 4H), 7.63 (t, *J* = 7.5 Hz, 1H), 7.54 (t, *J* = 7.5 Hz, 1H), 7.45 (t, *J* = 7.6 Hz, 2H), 7.32 (t, *J* = 7.3 Hz, 1H); <sup>13</sup>C NMR (100 MHz, DMSO-*d*<sub>6</sub>, ppm) δ 155.29, 149.99, 140.9, 140.1, 133.0, 129.0, 128.6, 127.6, 127.0, 126.8, 126.2, 124.5, 122.8, 120.7, 118.2; HRMS calcd. for: C<sub>19</sub>H<sub>15</sub>N<sub>2</sub>S [M+H]<sup>+</sup> 303.0951, found 303.0946.

***N*-(Naphthalen-2-yl)benzo[d]isothiazol-3-amine (2l)**

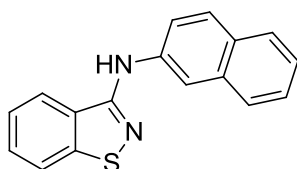

2-Chloro-*N*-(naphthalen-2-yl)benzimidamide (**1l**, 56.0 mg, 0.2 mmol) was used as the substrate under the given reaction conditions. The residue was purified by column chromatography (silica gel, petroleum ether/ethyl acetate = 20:1) to give **2l** as yellow solid, 37.0 mg, yield 67%.

$^1\text{H}$  NMR (400 MHz,  $\text{CDCl}_3$ , ppm)  $\delta$  8.53 (d,  $J = 1.7$  Hz, 1H), 7.89-7.77 (m, 5H), 7.61-7.53 (m, 2H), 7.45 (q,  $J = 7.0$  Hz, 2H), 7.38-7.34 (m, 1H), 7.22 (s, 1H);  $^{13}\text{C}$  NMR (100 MHz,  $\text{CDCl}_3$ , ppm)  $\delta$  154.3, 151.0, 137.7, 134.4, 129.7, 128.8, 128.2, 127.5, 127.4, 127.2, 126.4, 124.3, 124.1, 120.7, 120.5, 119.3, 113.4; HRMS calcd. for:  $\text{C}_{17}\text{H}_{13}\text{N}_2\text{S}$   $[\text{M}+\text{H}]^+$  277.0794, found 277.0790.

***N*-(*m*-Tolyl)benzo[d]isothiazol-3-amine (2m)**

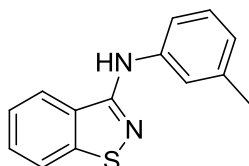

2-Chloro-*N*-(*m*-tolyl)benzimidamide (**1m**, 48.8 mg, 0.2 mmol) was used as the substrate under the given reaction conditions. The residue was purified by column chromatography (silica gel, petroleum ether/ethyl acetate = 20:1) to give **2m** as gray solid, 26.0 mg, yield 54%.

$^1\text{H}$  NMR (400 MHz,  $\text{CDCl}_3$ , ppm)  $\delta$  7.84 (d,  $J = 8.0$  Hz, 1H), 7.77 (d,  $J = 8.0$  Hz, 1H), 7.57-7.50 (m, 3H), 7.40 (t,  $J = 7.4$  Hz, 1H), 7.24 (t,  $J = 7.7$  Hz, 1H), 6.99 (s, 1H), 6.86 (d,  $J = 7.3$  Hz, 1H), 2.37 (s, 3H);  $^{13}\text{C}$  NMR (100 MHz,  $\text{CDCl}_3$ , ppm)  $\delta$  154.4, 151.0, 140.2, 139.0, 128.9, 128.1, 127.1, 124.1, 123.2, 120.7, 120.4, 118.7, 115.2, 21.6; HRMS calcd. for:  $\text{C}_{14}\text{H}_{13}\text{N}_2\text{S}$   $[\text{M}+\text{H}]^+$  241.0794, found 241.0790.

***N*-(3-Ethylphenyl)benzo[d]isothiazol-3-amine (2n)**

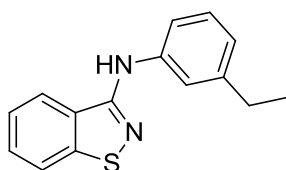

2-Chloro-*N*-(3-ethylphenyl)benzimidamide (**1n**, 51.6 mg, 0.2 mmol) was used as the substrate under the given reaction conditions. The residue was purified by column chromatography (silica gel, petroleum ether/ethyl acetate = 20:1) to give **2n** as yellow solid, 41.1 mg, yield 81%.

$^1\text{H}$  NMR (400 MHz,  $\text{CDCl}_3$ , ppm)  $\delta$  7.84 (d,  $J = 8.1$  Hz, 1H), 7.78 (d,  $J = 8.1$  Hz, 1H), 7.61-7.49 (m, 3H), 7.41 (t,  $J = 7.6$  Hz, 1H), 7.28 (t,  $J = 7.8$  Hz, 1H), 7.01 (s, 1H), 6.90 (d,  $J = 7.6$  Hz, 1H), 2.68 (q,  $J = 7.6$  Hz, 2H), 1.27 (t,  $J = 7.6$  Hz, 3H);  $^{13}\text{C}$  NMR (100 MHz,  $\text{CDCl}_3$ , ppm)  $\delta$  154.4, 151.0, 145.4, 140.2, 129.0, 128.1, 127.1, 124.1, 121.9, 120.7, 120.4, 117.6, 115.5, 29.0, 15.5; HRMS



calcd. for: C<sub>15</sub>H<sub>15</sub>N<sub>2</sub>S [M+H]<sup>+</sup> 255.0951, found 255.0949.

***N*-(3-Chlorophenyl)benzo[d]isothiazol-3-amine (2o)**

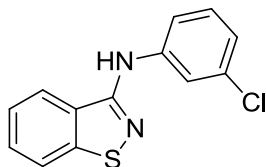

2-Chloro-*N*-(3-chlorophenyl)benzimidamide (**1o**, 52.8 mg, 0.2 mmol) was used as the substrate under the given reaction conditions. The residue was purified by column chromatography (silica gel, petroleum ether/ethyl acetate = 20:1) to give **2o** as white solid, 23.4 mg, yield 45%.

<sup>1</sup>H NMR (400 MHz, CDCl<sub>3</sub>, ppm) δ 7.93 (t, *J* = 2.0 Hz, 1H), 7.86 (d, *J* = 8.1 Hz, 1H), 7.78 (d, *J* = 8.1 Hz, 1H), 7.55 (t, *J* = 7.6 Hz, 2H), 7.44 (t, *J* = 7.4 Hz, 1H), 7.27 (t, *J* = 6.5 Hz, 1H), 7.09 (s, 1H), 7.01 (d, *J* = 7.9, 1H); <sup>13</sup>C NMR (100 MHz, CDCl<sub>3</sub>, ppm) δ 153.7, 151.0, 141.4, 134.8, 130.1, 128.3, 126.9, 124.4, 122.2, 120.6, 120.5, 117.8, 115.9; HRMS calcd. for: C<sub>13</sub>H<sub>10</sub>ClN<sub>2</sub>S [M+H]<sup>+</sup> 261.0248, found 261.0244.

***N*-(*o*-Tolyl)benzo[d]isothiazol-3-amine (2p)**

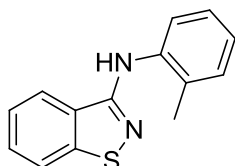

2-Chloro-*N*-(*o*-tolyl)benzimidamide (**1p**, 48.8 mg, 0.2 mmol) was used as the substrate under the given reaction conditions. The residue was purified by column chromatography (silica gel, petroleum ether/ethyl acetate = 20:1) to give **2p** as off white solid, 31.7 mg, yield 66%.

<sup>1</sup>H NMR (400 MHz, CDCl<sub>3</sub>, ppm) δ 8.22 (d, *J* = 8.0 Hz, 1H), 7.84 (d, *J* = 8.1 Hz, 1H), 7.73 (d, *J* = 8.1 Hz, 1H), 7.54-7.50 (m, 1H), 7.40 (t, *J* = 7.3 Hz, 1H), 7.28-7.21 (m, 2H), 7.01 (t, *J* = 7.1 Hz, 1H), 6.82 (s, 1H), 2.38 (s, 3H); <sup>13</sup>C NMR (100 MHz, CDCl<sub>3</sub>, ppm) δ 154.9, 151.3, 138.5, 130.5, 128.1, 127.2, 127.0, 126.5, 124.2, 122.9, 120.9, 120.5, 119.7, 17.7; HRMS calcd. for: C<sub>14</sub>H<sub>13</sub>N<sub>2</sub>S [M+H]<sup>+</sup> 241.0794, found 241.0795.

***N*-(2,4-Dimethylphenyl)benzo[d]isothiazol-3-amine (2q)**

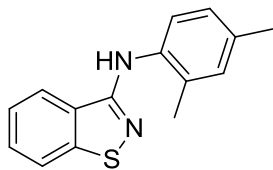

2-Chloro-*N*-(2,4-dimethylphenyl)benzimidamide (**1q**, 51.6 mg, 0.2 mmol) was used as the substrate under the given reaction conditions. The residue was purified by column chromatography (silica gel, petroleum ether/ethyl acetate = 20:1) to give **2q** as white solid, 39.1 mg, yield 77%.

$^1\text{H}$  NMR (400 MHz,  $\text{CDCl}_3$ , ppm)  $\delta$  7.95 (d,  $J$  = 8.6 Hz, 1H), 7.83 (d,  $J$  = 8.1 Hz, 1H), 7.72 (d,  $J$  = 8.1 Hz, 1H), 7.56-7.49 (m, 1H), 7.43-7.36 (m, 1H), 7.07-7.05 (m, 2H), 6.75 (s, 1H), 2.3 (s, 3H), 2.3 (s, 3H);  $^{13}\text{C}$  NMR (100 MHz,  $\text{CDCl}_3$ , ppm)  $\delta$  155.5, 151.3, 135.8, 133.0, 131.3, 128.1, 127.7, 127.5, 127.0, 124.1, 121.0, 120.8, 120.5, 20.8, 17.7; HRMS calcd. for:  $\text{C}_{15}\text{H}_{15}\text{N}_2\text{S}$   $[\text{M}+\text{H}]^+$  255.0951, found 255.0948.

#### *N*-(3,4-Dimethoxyphenyl)benzo[d]isothiazol-3-amine (**2r**)

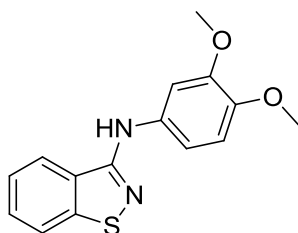

2-Chloro-*N*-(3,4-dimethoxyphenyl)benzimidamide (**1r**, 58.0 mg, 0.2 mmol) was used as the substrate under the given reaction conditions. The residue was purified by column chromatography (silica gel, petroleum ether/ethyl acetate = 10:1) to give **2r** as violet solid, 50.3 mg, yield 88%.

$^1\text{H}$  NMR (400 MHz,  $\text{CDCl}_3$ , ppm)  $\delta$  7.84 (d,  $J$  = 8.1 Hz, 1H), 7.78 (d,  $J$  = 8.1 Hz, 1H), 7.55-7.50 (m, 2H), 7.43-7.37 (m, 1H), 7.15 (dd,  $J$  = 8.6, 2.3 Hz, 1H), 7.00 (s, 1H), 6.87 (d,  $J$  = 8.6 Hz, 1H), 3.92 (s, 3H), 3.88 (s, 3H);  $^{13}\text{C}$  NMR (100 MHz,  $\text{CDCl}_3$ , ppm)  $\delta$  155.0, 150.9, 149.2, 144.6, 134.1, 128.1, 126.9, 124.1, 120.9, 120.3, 111.8, 110.5, 103.9, 56.2, 55.8; HRMS calcd. for:  $\text{C}_{15}\text{H}_{15}\text{N}_2\text{O}_2\text{S}$   $[\text{M}+\text{H}]^+$  287.0849, found 287.0848.

#### *N*-(3,4,5-Trimethoxyphenyl)benzo[d]isothiazol-3-amine (**2s**)

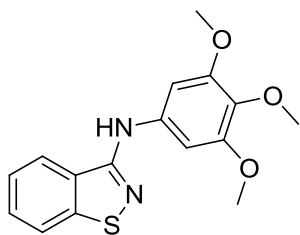

2-Chloro-*N*-(3,4,5-trimethoxyphenyl)benzimidamide (**1s**, 64.0 mg, 0.2 mmol) was used as the substrate under the given reaction conditions. The residue was purified by column chromatography (silica gel, petroleum ether/ethyl acetate = 5:1) to give **2s** as yellow solid, 32.8 mg, yield 52%.

$^1\text{H}$  NMR (400 MHz,  $\text{CDCl}_3$ , ppm)  $\delta$  7.83 (dd,  $J$  = 10.5, 8.2 Hz, 2H), 7.53 (t,  $J$  = 7.4 Hz, 1H), 7.40 (t,  $J$  = 7.7 Hz, 1H), 7.08 (s, 3H), 3.88 (s, 6H), 3.83 (s, 3H);  $^{13}\text{C}$  NMR (100 MHz,  $\text{CDCl}_3$ , ppm)  $\delta$  154.5, 153.5, 150.9, 136.6, 133.2, 128.2, 127.0, 124.2, 120.8, 120.4, 96.1, 61.0, 56.1; HRMS calcd. for:  $\text{C}_{16}\text{H}_{17}\text{N}_2\text{O}_3\text{S}$   $[\text{M}+\text{H}]^+$  317.0955, found 317.0954.

#### 6-Methyl-*N*-phenylbenzo[d]isothiazol-3-amine (**2u**)

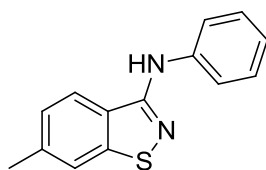

2-Chloro-4-methyl-*N*-phenylbenzimidamide (**1u**, 48.8 mg, 0.2 mmol) was used as the substrate under the given reaction conditions. The residue was purified by column chromatography (silica gel, petroleum ether/ethyl acetate = 20:1) to give **2u** as yellow solid, 38.0 mg, yield 72%.

$^1\text{H}$  NMR (400 MHz,  $\text{CDCl}_3$ , ppm)  $\delta$  7.76-7.68 (m, 2H), 7.63-7.54 (m, 2H), 7.34 (t,  $J$  = 7.9 Hz, 2H), 7.18 (d,  $J$  = 8.2 Hz, 1H), 7.02 (t,  $J$  = 7.4 Hz, 1H), 6.96 (s, 1H), 2.47 (s, 3H);  $^{13}\text{C}$  NMR (100 MHz,  $\text{CDCl}_3$ , ppm)  $\delta$  154.2, 151.4, 140.3, 138.7, 129.1, 126.0, 125.2, 122.1, 120.3, 120.1, 117.9, 21.6; HRMS calcd. for:  $\text{C}_{14}\text{H}_{13}\text{N}_2\text{S}$   $[\text{M}+\text{H}]^+$  241.0794, found 241.0794.

#### 7-Methyl-*N*-phenylbenzo[d]isothiazol-3-amine (**2v**)

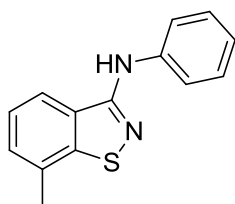

2-Chloro-3-methyl-*N*-phenylbenzimidamide (**1v**, 48.8 mg, 0.2 mmol) was used as the substrate under the given reaction conditions. The residue was purified by column chromatography (silica gel, petroleum ether/ethyl acetate = 20:1) to give **2v** as violet solid, 19.7 mg, yield 41%.

$^1\text{H}$  NMR (400 MHz,  $\text{CDCl}_3$ , ppm)  $\delta$  7.77-7.72 (m, 2H), 7.61 (d,  $J$  = 7.9 Hz, 1H), 7.38-7.28 (m, 4H), 7.04 (t,  $J$  = 7.4 Hz, 1H), 7.00 (s, 1H), 2.53 (s, 3H);  $^{13}\text{C}$  NMR (100 MHz,  $\text{CDCl}_3$ , ppm)  $\delta$  155.0, 151.4, 140.3, 130.7, 129.1, 128.2, 126.9, 125.0, 122.2, 118.2, 118.0, 19.9; HRMS calcd. for:  $\text{C}_{14}\text{H}_{13}\text{N}_2\text{S}$   $[\text{M}+\text{H}]^+$  241.0794, found 241.0790.

#### 6-Fluoro-*N*-phenylbenzo[d]isothiazol-3-amine (**2w**)

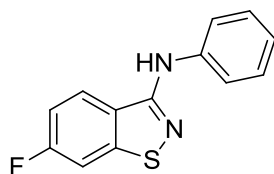

2-Chloro-4-fluoro-*N*-phenylbenzimidamide (**1w**, 49.6 mg, 0.2 mmol) was used as the substrate under the given reaction conditions. The residue was purified by column chromatography (silica gel, petroleum ether/ethyl acetate = 20:1) to give **2w** as yellow solid, 36.6 mg, yield 75%.

$^1\text{H}$  NMR (400 MHz,  $\text{CDCl}_3$ , ppm)  $\delta$  7.75-7.68 (m, 3H), 7.49 (dd,  $J$  = 8.2, 2.0 Hz, 1H), 7.36 (t,  $J$  = 7.9 Hz, 2H), 7.14 (td,  $J$  = 8.6, 2.1 Hz, 1H), 7.05 (t,  $J$  = 7.4 Hz, 1H), 6.96 (s, 1H);  $^{13}\text{C}$  NMR (100 MHz,  $\text{CDCl}_3$ , ppm)  $\delta$  162.8 (d,  $J$  = 249.7 Hz), 153.8, 152.8 (d,  $J$  = 10.2 Hz), 140.0, 129.1, 123.8, 122.5, 122.2 (d,  $J$  = 10.2 Hz), 118.2, 113.5 (d,  $J$  = 25.4 Hz), 106.4 (d,  $J$  = 25.2 Hz); HRMS calcd. for:  $\text{C}_{13}\text{H}_{10}\text{FN}_2\text{S}$   $[\text{M}+\text{H}]^+$  245.0543, found 245.0549.

#### 6-Chloro-*N*-phenylbenzo[d]isothiazol-3-amine (**2x**)

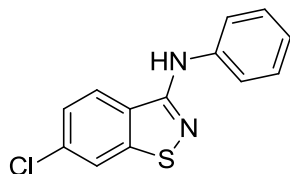

2,4-Dichloro-*N*-phenylbenzimidamide (**1x**, 52.8 mg, 0.2 mmol) was used as the substrate under the given reaction conditions. The residue was purified by column chromatography (silica gel, petroleum ether/ethyl acetate = 20:1) to give **2x** as gray solid, 44.7 mg, yield 86%.

$^1\text{H}$  NMR (400 MHz,  $\text{CDCl}_3$ , ppm)  $\delta$  7.82 (d,  $J$  = 1.6 Hz, 1H), 7.72-7.67 (m, 3H), 7.39-7.34 (m, 3H), 7.08-7.04 (m, 1H), 7.00 (s, 1H);  $^{13}\text{C}$  NMR (100 MHz,  $\text{CDCl}_3$ , ppm)  $\delta$  153.9, 152.4, 140.0, 135.1, 129.2, 125.6, 125.1, 122.6, 121.6, 120.0, 118.1; HRMS calcd. for:  $\text{C}_{13}\text{H}_{10}\text{ClN}_2\text{S}$   $[\text{M}+\text{H}]^+$  261.0248, found 261.0245.

#### 6-Bromo-*N*-phenylbenzo[d]isothiazol-3-amine (2y)

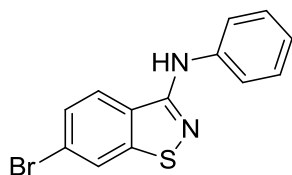

4-Bromo-2-chloro-*N*-phenylbenzimidamide (**1y**, 61.6 mg, 0.2 mmol) was used as the substrate under the given reaction conditions. The residue was purified by column chromatography (silica gel, petroleum ether/ethyl acetate = 20:1) to give **2y** as off white solid, 35.9 mg, yield 59%.

$^1\text{H}$  NMR (400 MHz,  $\text{CDCl}_3$ , ppm)  $\delta$  7.96 (d,  $J$  = 1.4 Hz, 1H), 7.69 (dd,  $J$  = 8.6, 0.9 Hz, 2H), 7.59 (d,  $J$  = 8.6 Hz, 1H), 7.48 (dd,  $J$  = 8.6, 1.6 Hz, 1H), 7.38-7.33 (m, 2H), 7.05 (t,  $J$  = 7.4 Hz, 1H), 6.97 (s, 1H);  $^{13}\text{C}$  NMR (100 MHz,  $\text{CDCl}_3$ , ppm)  $\delta$  154.0, 152.7, 139.9, 129.1, 127.6, 125.9, 123.3, 123.0, 122.5, 121.7, 118.1; HRMS calcd. for:  $\text{C}_{13}\text{H}_{10}\text{BrN}_2\text{S}$   $[\text{M}+\text{H}]^+$  304.9743, found 304.9741.

#### 5-Bromo-*N*-phenylbenzo[d]isothiazol-3-amine (2z)

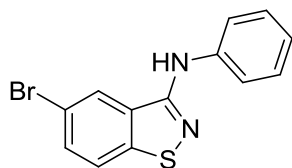

5-Bromo-2-chloro-*N*-phenylbenzimidamide (**1z**, 61.6 mg, 0.2 mmol) was used as the substrate under the given reaction conditions. The residue was purified by column chromatography (silica gel, petroleum ether/ethyl acetate = 20:1) to give **2z** as white solid, 58.3 mg, yield 96%.

$^1\text{H}$  NMR (400 MHz,  $\text{CDCl}_3$ , ppm)  $\delta$  7.94 (d,  $J$  = 1.3 Hz, 1H), 7.72 (d,  $J$  = 8.5 Hz, 3H), 7.62 (dd,  $J$  = 8.6, 1.7 Hz, 1H), 7.42-7.34 (m, 2H), 7.08 (t,  $J$  = 7.4 Hz, 1H), 6.97 (s, 1H);  $^{13}\text{C}$  NMR (100 MHz,  $\text{CDCl}_3$ , ppm)  $\delta$  153.4, 149.9, 139.9, 131.3, 129.2, 128.7, 123.7, 122.6, 121.7, 118.2, 118.0; HRMS calcd. for:  $\text{C}_{13}\text{H}_{10}\text{BrN}_2\text{S}$   $[\text{M}+\text{H}]^+$  304.9743, found 304.9747.

***N*-Phenyl-5-(trifluoromethyl)benzo[d]isothiazol-3-amine (2aa)**

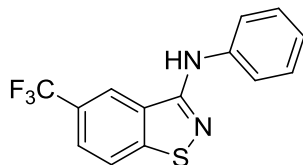

2-Chloro-*N*-phenyl-5-(trifluoromethyl)benzimidamide (**1aa**, 59.6 mg, 0.2 mmol) was used as the substrate under the given reaction conditions. The residue was purified by column chromatography (silica gel, petroleum ether/ethyl acetate = 20:1) to give **2aa** as white solid, 58.8 mg, yield 97%.

$^1\text{H}$  NMR (400 MHz,  $\text{CDCl}_3$ , ppm)  $\delta$  8.05 (s, 1H), 7.94 (d,  $J$  = 8.5 Hz, 1H), 7.74 (dd,  $J$  = 8.6, 1.0 Hz, 3H), 7.42-7.34 (m, 2H), 7.13-7.01 (m, 2H);  $^{13}\text{C}$  NMR (100 MHz,  $\text{CDCl}_3$ , ppm)  $\delta$  154.5, 154.3, 139.8, 129.2, 126.9 (q,  $J$  = 32.7 Hz), 126.8, 124.5 (q,  $J$  = 2.8 Hz), 124.1 (q,  $J$  = 270.6 Hz), 122.8, 121.1, 118.4, 118.3; HRMS calcd. for:  $\text{C}_{14}\text{H}_{10}\text{F}_3\text{N}_2\text{S}$   $[\text{M}+\text{H}]^+$  295.0512, found 295.0515.

***N*-Phenyl-6-(trifluoromethyl)benzo[d]isothiazol-3-amine (2ab)**

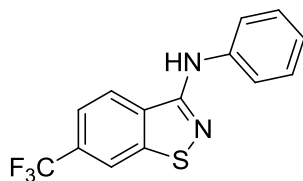

2-Chloro-*N*-phenyl-4-(trifluoromethyl)benzimidamide (**1ab**, 59.6 mg, 0.2 mmol) was used as the substrate under the given reaction conditions. The residue was purified by column chromatography (silica gel, petroleum ether/ethyl acetate = 20:1) to give **2ab** as gray solid, 48.8 mg, yield 83%.

$^1\text{H}$  NMR (400 MHz,  $\text{CDCl}_3$ , ppm)  $\delta$  8.13 (s, 1H), 7.88 (d,  $J$  = 8.4 Hz, 1H), 7.73 (d,  $J$  = 8.4 Hz, 2H), 7.63 (d,  $J$  = 8.4 Hz, 1H), 7.38 (t,  $J$  = 7.6 Hz, 2H), 7.09-7.05 (m, 2H);  $^{13}\text{C}$  NMR (100 MHz,  $\text{CDCl}_3$ , ppm)  $\delta$  154.1, 151.2, 139.8, 130.3 (q,  $J$  = 32.5 Hz), 129.2, 128.9, 123.9 (q,  $J$  = 271.3 Hz), 122.8, 121.6, 121.0 (q,  $J$  = 3.2 Hz), 118.2, 117.9 (q,  $J$  = 4.3 Hz); HRMS calcd. for:  $\text{C}_{14}\text{H}_{10}\text{F}_3\text{N}_2\text{S}$   $[\text{M}+\text{H}]^+$  295.0512, found 295.0515.

**Benzo[d]isothiazol-3-amine (2ac)**

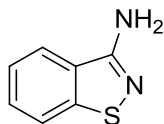

2-Chloro-benzamidine hydrochloride (**1ac**, 38.0 mg, 0.2 mmol) was used as the substrate under the given reaction conditions. The residue was purified by column chromatography (silica gel, petroleum ether/ethyl acetate = 5:1) to give **2ac** as faint yellow solid, 24.3 mg, yield 81%.

$^1\text{H}$  NMR (400 MHz,  $\text{CDCl}_3$ , ppm)  $\delta$  7.81 (d,  $J$  = 8.2 Hz, 1H), 7.71 (d,  $J$  = 8.1 Hz, 1H), 7.53-7.48 (m, 1H), 7.38 (t,  $J$  = 7.5 Hz, 1H), 4.69 (s, 2H);  $^{13}\text{C}$  NMR (100 MHz,  $\text{CDCl}_3$ , ppm)  $\delta$  158.6, 151.9, 128.0, 126.3, 124.0, 121.6, 120.4; HRMS calcd. for:  $\text{C}_7\text{H}_7\text{N}_2\text{S}$   $[\text{M}+\text{H}]^+$  151.0325, found 151.0321.

#### ***N*-Methyl-*N*-phenylbenzo[d]isothiazol-3-amine (2ad)**

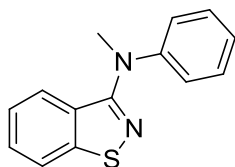

2-Chloro-*N*-methyl-*N*-phenylbenzimidamide (**1ad**, 48.8 mg, 0.2 mmol) was used as the substrate under the given reaction conditions. The residue was purified by column chromatography (silica gel, petroleum ether/ethyl acetate = 20:1) to give **2ad** as yellow solid, 15.8 mg, yield 33%.

$^1\text{H}$  NMR (400 MHz,  $\text{CDCl}_3$ , ppm)  $\delta$  7.76 (d,  $J$  = 8.2 Hz, 1H), 7.38-7.31 (m, 3H), 7.22-7.14 (m, 3H), 7.04-7.00 (m, 1H), 6.91-6.88 (m, 1H), 3.60 (s, 3H);  $^{13}\text{C}$  NMR (100 MHz,  $\text{CDCl}_3$ , ppm)  $\delta$  160.7, 152.7, 147.9, 129.4, 127.7, 127.2, 125.2, 125.0, 124.6, 123.5, 120.1, 42.3; HRMS calcd. for:  $\text{C}_{14}\text{H}_{13}\text{N}_2\text{S}$   $[\text{M}+\text{H}]^+$  241.0794, found 241.0788.

#### ***N*-Phenylisothiazolo[5,4-*b*]pyridin-3-amine (2ae)**

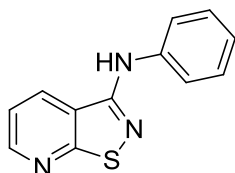

2-Chloro-*N*-phenylnicotinimidamide (**1ae**, 46.2 mg, 0.2 mmol) was used as the substrate under the given reaction conditions. The residue was purified by column chromatography (silica gel, petroleum ether/ethyl acetate = 4:1) to give **2ae** as yellow solid, 43.6 mg, yield 96%.

$^1\text{H}$  NMR (400 MHz,  $\text{DMSO-}d_6$ , ppm)  $\delta$  9.81 (s, 1H), 8.96-8.68 (m, 2H), 7.92 (d,  $J$  = 8.0 Hz, 2H), 7.66-7.47 (m, 1H), 7.35 (t,  $J$  = 7.5 Hz, 2H), 6.99 (t,  $J$  = 7.0 Hz, 1H);  $^{13}\text{C}$  NMR (100 MHz,  $\text{DMSO-}d_6$ , ppm)  $\delta$  169.9, 153.9, 151.0, 140.8, 131.7, 128.8, 121.6, 120.6, 119.4, 117.9.

#### 6-Methyl-*N*-phenylisothiazolo[5,4-*b*]pyridin-3-amine (2af)

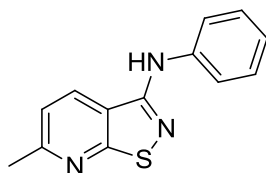

2-Chloro-6-methyl-*N*-phenylnicotinimidamide (**1af**, 49.0 mg, 0.2 mmol) was used as the substrate under the given reaction conditions. The residue was purified by column chromatography (silica gel, petroleum ether/ethyl acetate = 3:1) to give **2af** as yellow solid, 42.0 mg, yield 87%.

$^1\text{H}$  NMR (400 MHz,  $\text{DMSO-}d_6$ , ppm)  $\delta$  9.74 (s, 1H), 8.72 (d,  $J$  = 8.4 Hz, 1H), 7.91 (d,  $J$  = 7.9 Hz, 2H), 7.48-7.32 (m, 3H), 6.98 (t,  $J$  = 7.3 Hz, 1H), 2.65 (s, 3H);  $^{13}\text{C}$  NMR (100 MHz,  $\text{DMSO-}d_6$ , ppm)  $\delta$  169.9, 160.5, 153.8, 140.8, 131.6, 128.8, 121.5, 119.6, 118.6, 117.7, 24.3.

#### *N*-Phenylisothiazolo[5,4-*c*]pyridin-3-amine (2ag)

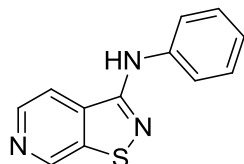

3-Chloro-*N*-phenylisonicotinimidamide (**1ag**, 46.2 mg, 0.2 mmol) was used as the substrate under the given reaction conditions. The residue was purified by column chromatography (silica gel, petroleum ether/ethyl acetate = 4:1) to give **2ag** as yellow solid, 42.7 mg, yield 94%.

$^1\text{H}$  NMR (400 MHz,  $\text{DMSO-}d_6$ , ppm)  $\delta$  9.82 (s, 1H), 9.41 (s, 1H), 8.63 (d,  $J$  = 5.5 Hz, 1H), 8.44 (d,  $J$  = 5.2 Hz, 1H), 7.95 (d,  $J$  = 7.9 Hz, 2H), 7.35 (t,  $J$  = 7.9 Hz, 2H), 7.00 (t,  $J$  = 7.3 Hz, 1H);  $^{13}\text{C}$  NMR (100 MHz,  $\text{DMSO-}d_6$ , ppm)  $\delta$  154.8, 145.7, 143.8, 143.0, 140.8, 132.5, 128.8, 121.7, 117.8, 116.5.

#### *tert*-Butyl benzo[*d*]isothiazol-3-ylcarbamate (4a)



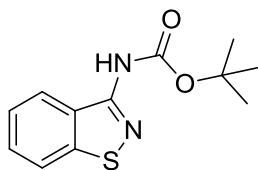

A 10 mL oven-dried reaction vessel was charged with benzo[d]isothiazol-3-amine (**2ac**, 30 mg, 0.2 mmol), Boc<sub>2</sub>O (43 mg, 0.2 mmol, 1.0 equiv), Et<sub>3</sub>N (84  $\mu$ L, 0.6 mmol, 3.0 equiv), CH<sub>2</sub>Cl<sub>2</sub> (1.0 mL) under air. The reaction vessel was stirred at room temperature for 24 h. The volatiles were removed under reduced pressure. The residue was purified by column chromatography on silica gel (petroleum ether/ethyl acetate = 20:1) to yield the desired product **4a** as white solid, 37.0 mg, yield 82%.

<sup>1</sup>H NMR (400 MHz, CDCl<sub>3</sub>, ppm)  $\delta$  8.05 (d,  $J$  = 8.2 Hz, 1H), 7.83 (d,  $J$  = 8.2 Hz, 1H), 7.80 (s, 1H), 7.54-7.48 (m, 1H), 7.45-7.38 (m, 1H), 1.56 (s, 9H); <sup>13</sup>C NMR (100 MHz, CDCl<sub>3</sub>, ppm)  $\delta$  152.4, 152.1, 152.0, 128.1, 128.0, 124.4, 123.9, 119.9, 81.7, 28.2; HRMS calcd. for: C<sub>12</sub>H<sub>15</sub>N<sub>2</sub>O<sub>2</sub>S [M+H]<sup>+</sup> 251.0849, found 251.0846.

#### ***N*-(Benzo[d]isothiazol-3-yl)-4-methyl-*N*-tosylbenzenesulfonamide (4b)**

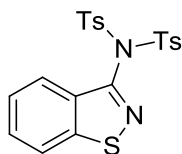

A 10 mL oven-dried reaction vessel was charged with benzo[d]isothiazol-3-amine (**2ac**, 30 mg, 0.2 mmol), tosyl chloride (76.2 mg, 0.4 mmol, 2.0 equiv), Et<sub>3</sub>N (84  $\mu$ L, 0.6 mmol, 3.0 equiv), CH<sub>2</sub>Cl<sub>2</sub> (1.0 mL) under air. The reaction vessel was stirred at room temperature for 24 h. The volatiles were removed under reduced pressure. The residue was purified by column chromatography on silica gel (petroleum ether/ethyl acetate = 20:1) to yield the desired product **4b** as white solid, 37.0 mg, yield 73%.

<sup>1</sup>H NMR (400 MHz, CDCl<sub>3</sub>, ppm)  $\delta$  7.91 (d,  $J$  = 8.2 Hz, 1H), 7.79 (d,  $J$  = 8.4 Hz, 4H), 7.68 (d,  $J$  = 8.2 Hz, 1H), 7.59-7.53 (m, 1H), 7.42-7.37 (m, 1H), 7.30 (d,  $J$  = 8.1 Hz, 4H), 2.47 (s, 6H); <sup>13</sup>C NMR (100 MHz, CDCl<sub>3</sub>, ppm)  $\delta$  152.8, 148.7, 145.4, 135.9, 132.9, 129.5, 129.0, 128.5, 125.8, 123.9, 120.0, 21.7; HRMS calcd. for: C<sub>21</sub>H<sub>19</sub>N<sub>2</sub>O<sub>4</sub>S<sub>3</sub> [M+H]<sup>+</sup> 459.0502, found 459.0492.

#### **2-(Benzo[d]isothiazol-3-yl)isoindoline-1,3-dione (4c)**

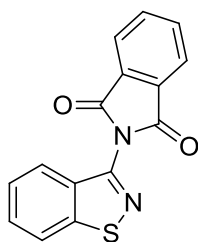

A 10 mL oven-dried reaction vessel was charged with benzo[*d*]isothiazol-3-amine (**2ac**, 30 mg, 0.2 mmol), phthalic anhydride (44.4 mg, 0.3 mmol, 1.5 equiv), 1-butyl-3-methylimidazolium hexafluorophosphate ([bmim][PF<sub>6</sub>], 1.0 ml) under air. The reaction vessel was stirred at 135 °C for 24 h. The volatiles were removed under reduced pressure. The residue was purified by column chromatography on silica gel (petroleum ether/ethyl acetate = 20:1) to yield the desired product **4c** as white solid, 37.0 mg, yield 94%.

<sup>1</sup>H NMR (400 MHz, CDCl<sub>3</sub>, ppm) δ 8.07-7.94 (m, 3H), 7.88-7.80 (m, 3H), 7.61-7.56 (m, 1H), 7.48-7.44 (m, 1H); <sup>13</sup>C NMR (100 MHz, CDCl<sub>3</sub>, ppm) δ 166.0, 153.1, 147.0, 134.8, 131.7, 130.4, 128.4, 125.4, 124.2, 123.5, 120.1; HRMS calcd. for: C<sub>15</sub>H<sub>9</sub>N<sub>2</sub>O<sub>2</sub>S [M+H]<sup>+</sup> 281.0379, found 281.0374.

**(S)-tert-Butyl (1-(benzo[*d*]isothiazol-3-ylamino)-1-oxopropan-2-yl)carbamate (4d)**

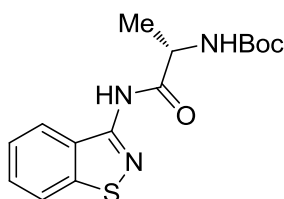

A 10 mL oven-dried reaction vessel was charged with benzo[*d*]isothiazol-3-amine (**2ac**, 30 mg, 0.2 mmol), Boc-Ala-OH (41.6 mg, 0.22 mmol, 1.1 equiv), T3P (2,4,6-tripropyl-1,3,5,2,4,6-trioxatriphosphinane 2,4,6-trioxide) in DMF (280 μl, c = 1.43 M, 0.4 mmol, 2.0 equiv), Et<sub>3</sub>N (52 μL, 0.4 mmol, 2.0 equiv), CH<sub>2</sub>Cl<sub>2</sub> (1.0 mL) under air. The reaction vessel was stirred at room temperature for 24 h. The volatiles were removed under reduced pressure. The residue was purified by column chromatography on silica gel (petroleum ether/ethyl acetate = 20:1) to yield the desired product **4d** as white solid, 37.0 mg, yield 70%.

<sup>1</sup>H NMR (400 MHz, CDCl<sub>3</sub>, ppm) δ 9.97 (s, 1H), 7.99 (d, *J* = 8.2 Hz, 1H), 7.79-7.74 (m, 1H), 7.50-7.44 (m, 1H), 7.35-7.27 (m, 1H), 5.58 (s, 1H), 4.58 (s, 1H), 1.51 (d, *J* = 7.0 Hz, 3H), 1.46 (s,

9H);  $^{13}\text{C}$  NMR (100 MHz,  $\text{CDCl}_3$ , ppm)  $\delta$  171.4, 156.3, 151.9, 151.5, 128.1, 124.5, 124.0, 123.3, 119.7, 80.6, 50.5, 28.3, 17.5; HRMS calcd. for:  $\text{C}_{15}\text{H}_{20}\text{N}_3\text{O}_3\text{S}$   $[\text{M}+\text{H}]^+$  322.1220, found 322.1216.

**3H-benzo[c][1,2]dithiole-3-thione (6a')** <sup>[2]</sup>

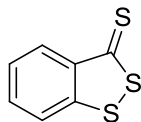

(2-chlorophenyl)methanamine (**5a**, 28.2 mg, 0.2 mmol) was used as the substrate under the given reaction conditions. The residue was purified by column chromatography (silica gel, petroleum ether/ethyl acetate = 100:1) to give **6a'** as yellow solid, 31.5 mg, yield 86%.

$^1\text{H}$  NMR (400 MHz,  $\text{CDCl}_3$ , ppm)  $\delta$  8.21 (d,  $J$  = 8.2 Hz, 1H), 7.74-7.66 (m, 2H), 7.49-7.42 (m, 1H);  $^{13}\text{C}$  NMR (100 MHz,  $\text{CDCl}_3$ , ppm)  $\delta$  216.8, 152.7, 140.7, 132.7, 128.5, 126.0, 124.3.

## 5. Reference

- [1] G. Brasche, S. L. Buchwald, *Angew. Chem. Int. Ed.*, **2008**, 120, 1958.
- [2] H. L. Jin, D. Jiang, J. Gao, G. Qiang, Y. Gong, *Phosphorus, Sulfur, and Silicon and the Related Elements*, **2011**, 186, 2341.

## 6. $^1\text{H}$ and $^{13}\text{C}$ NMR spectra of products

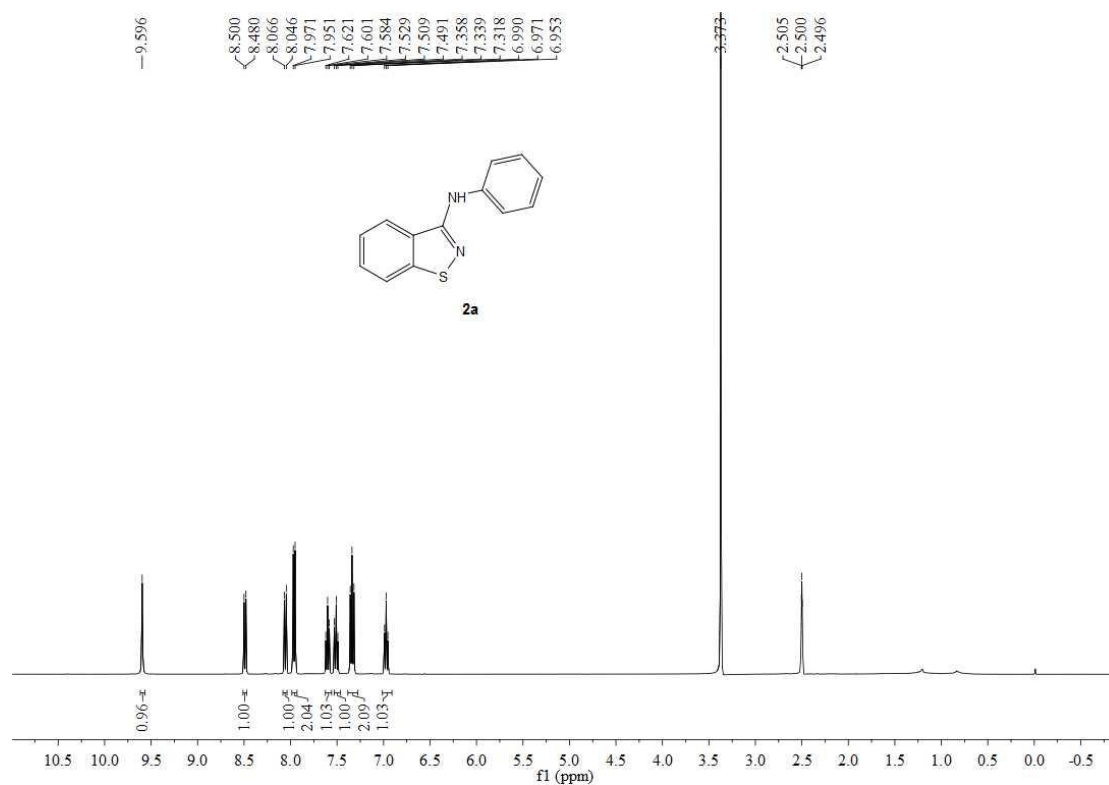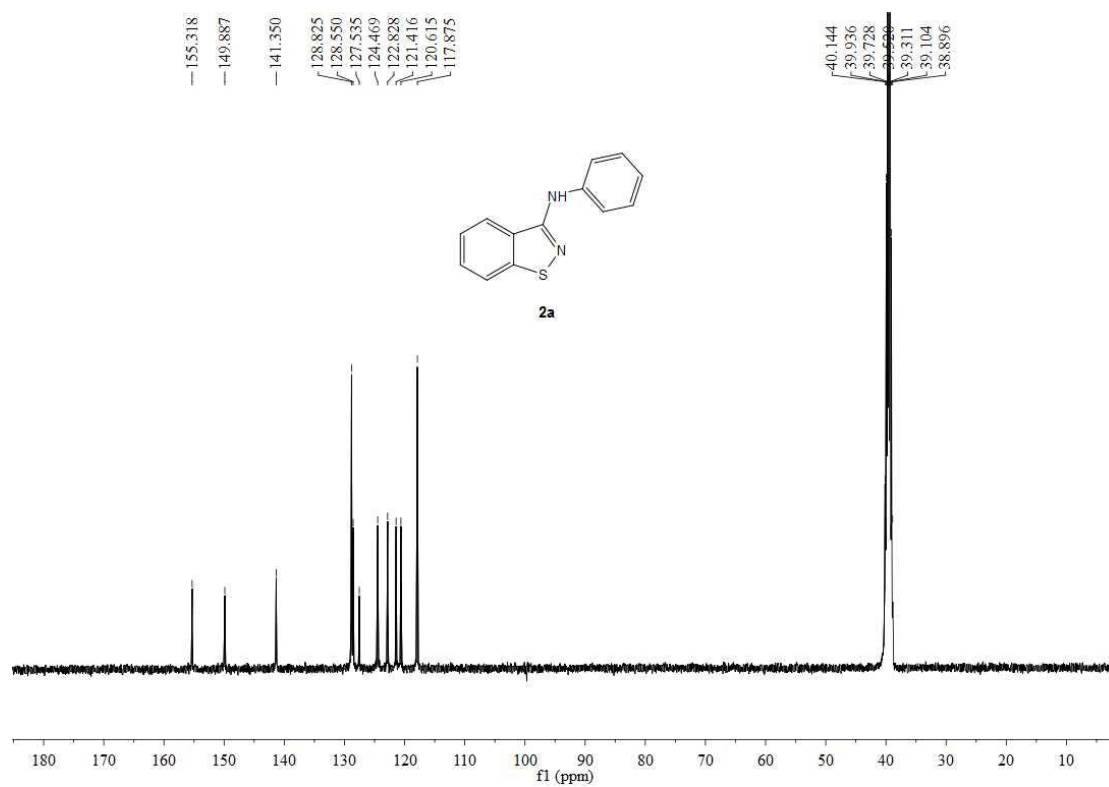

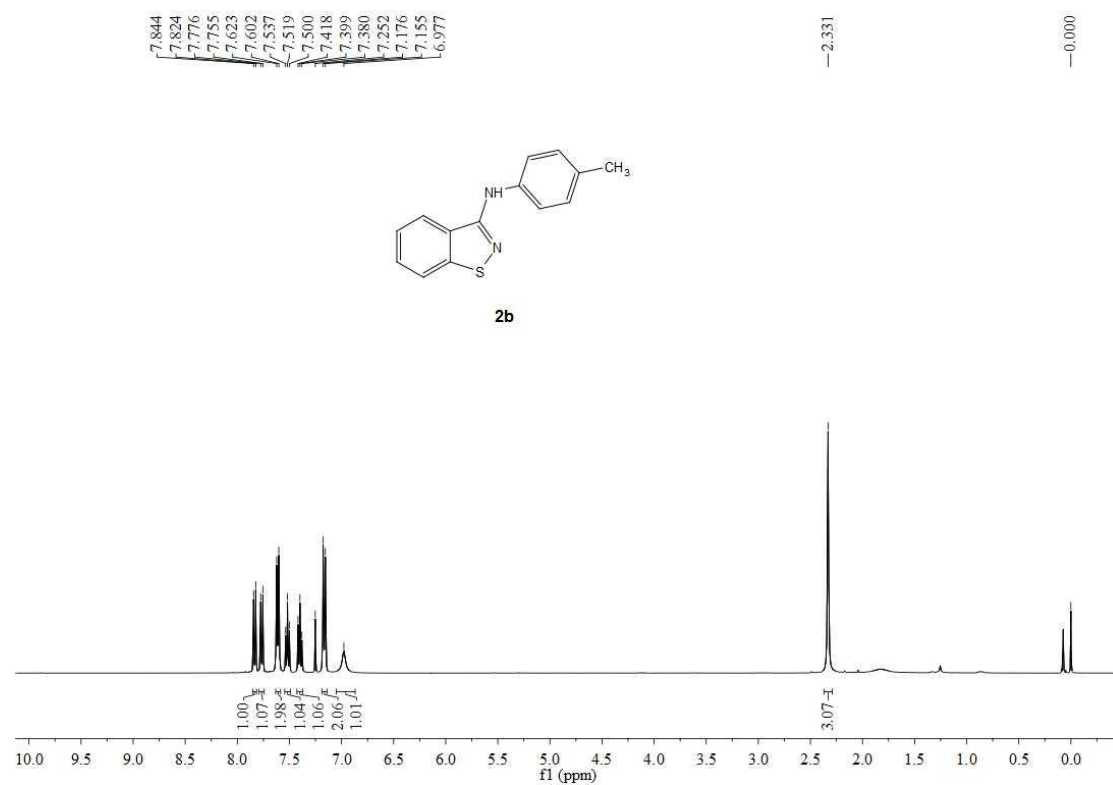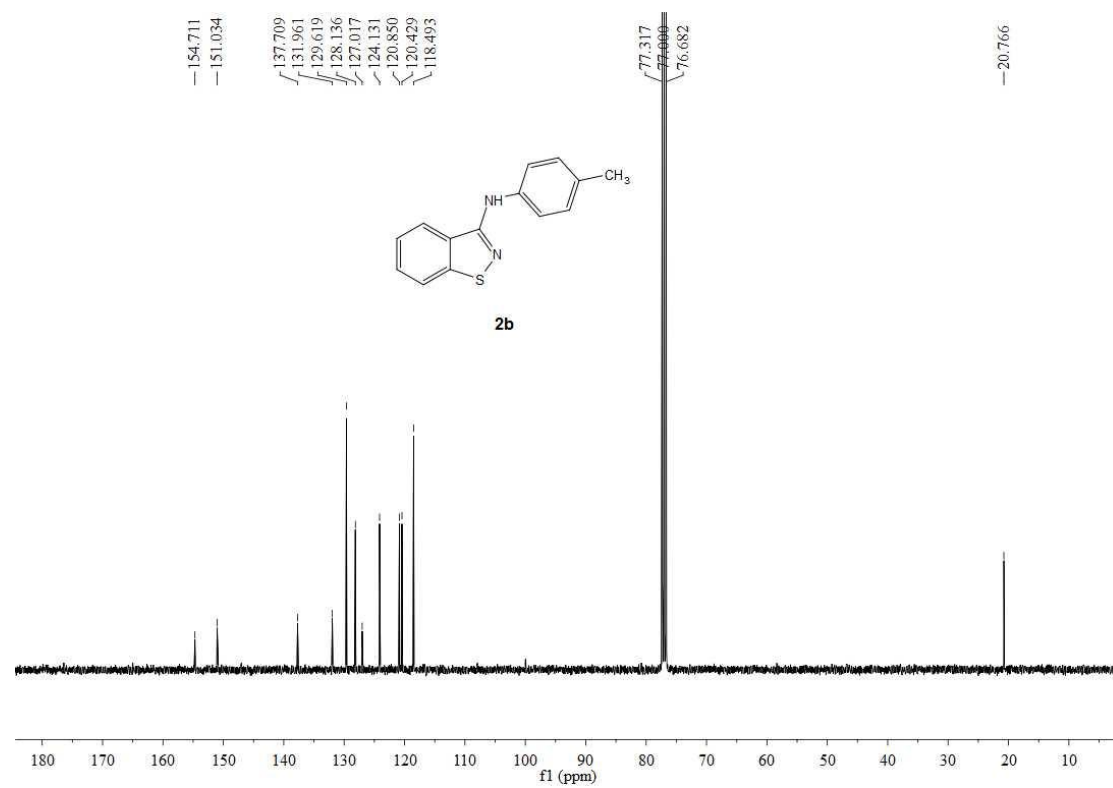

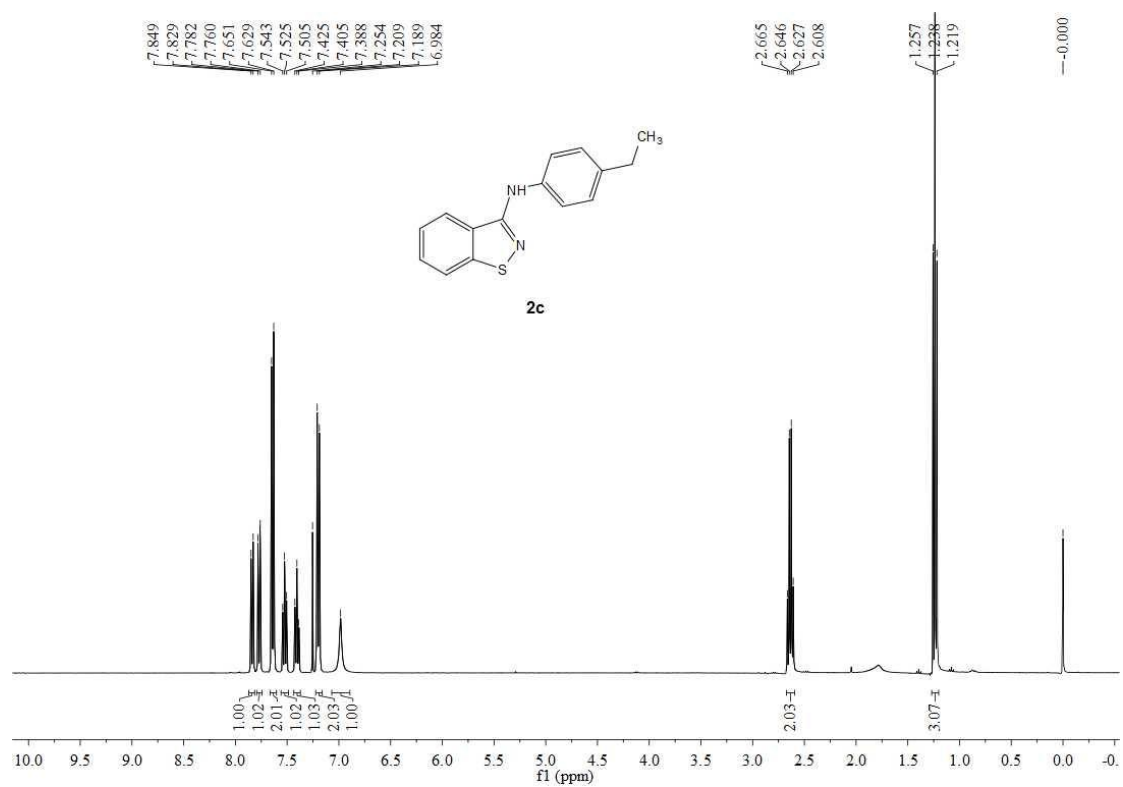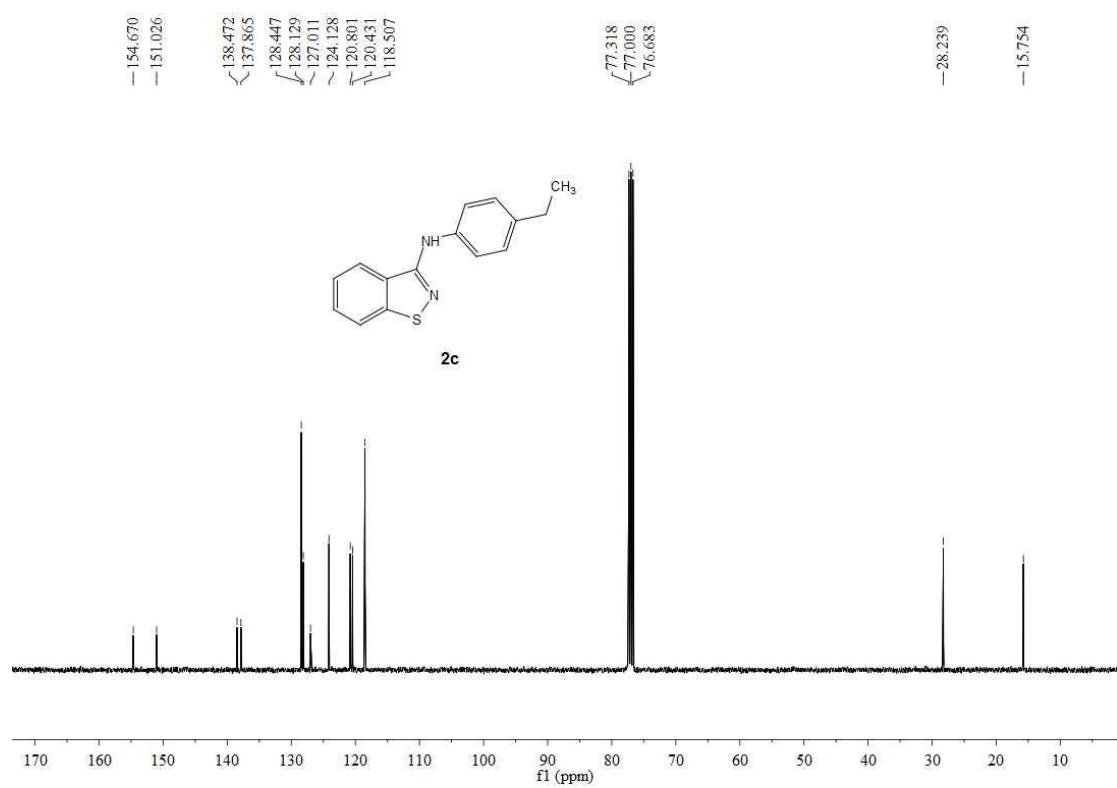

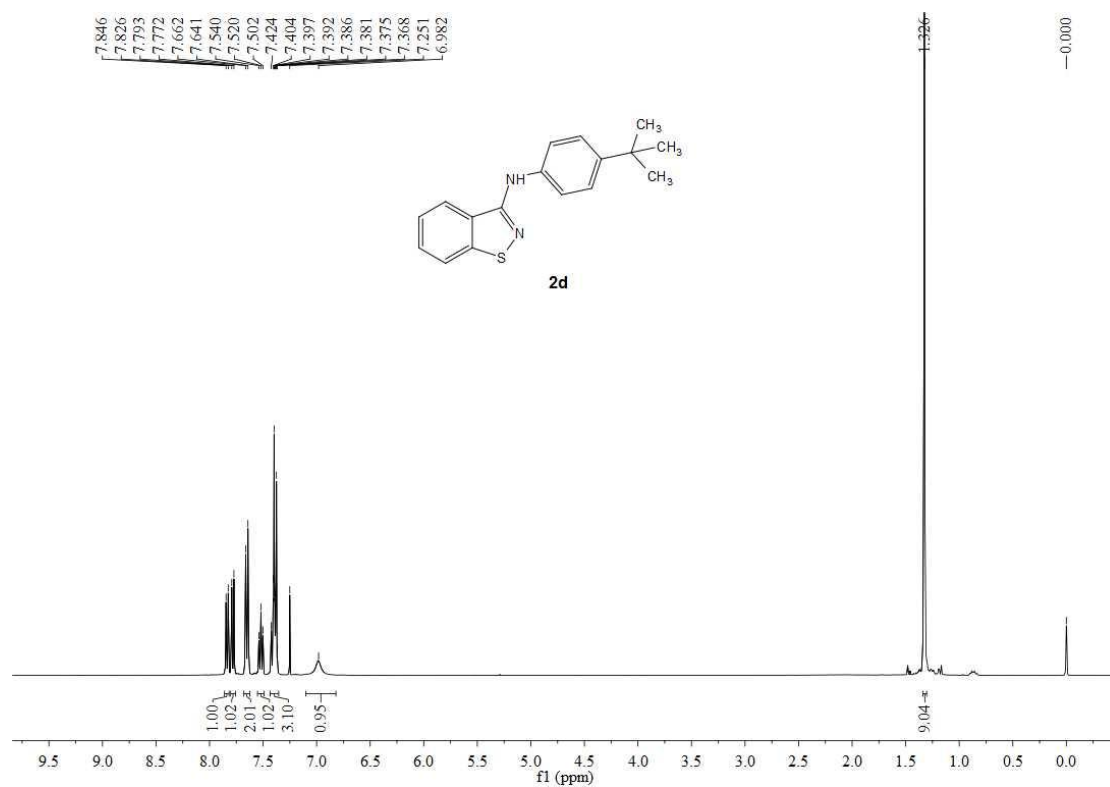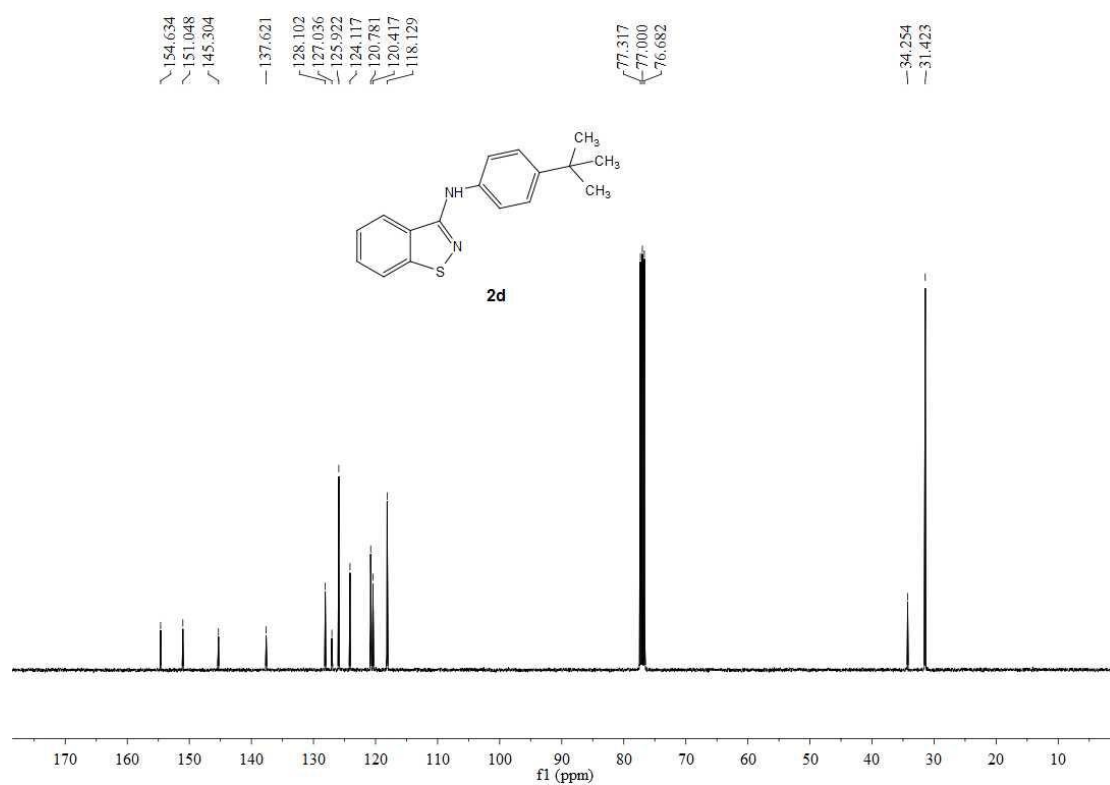

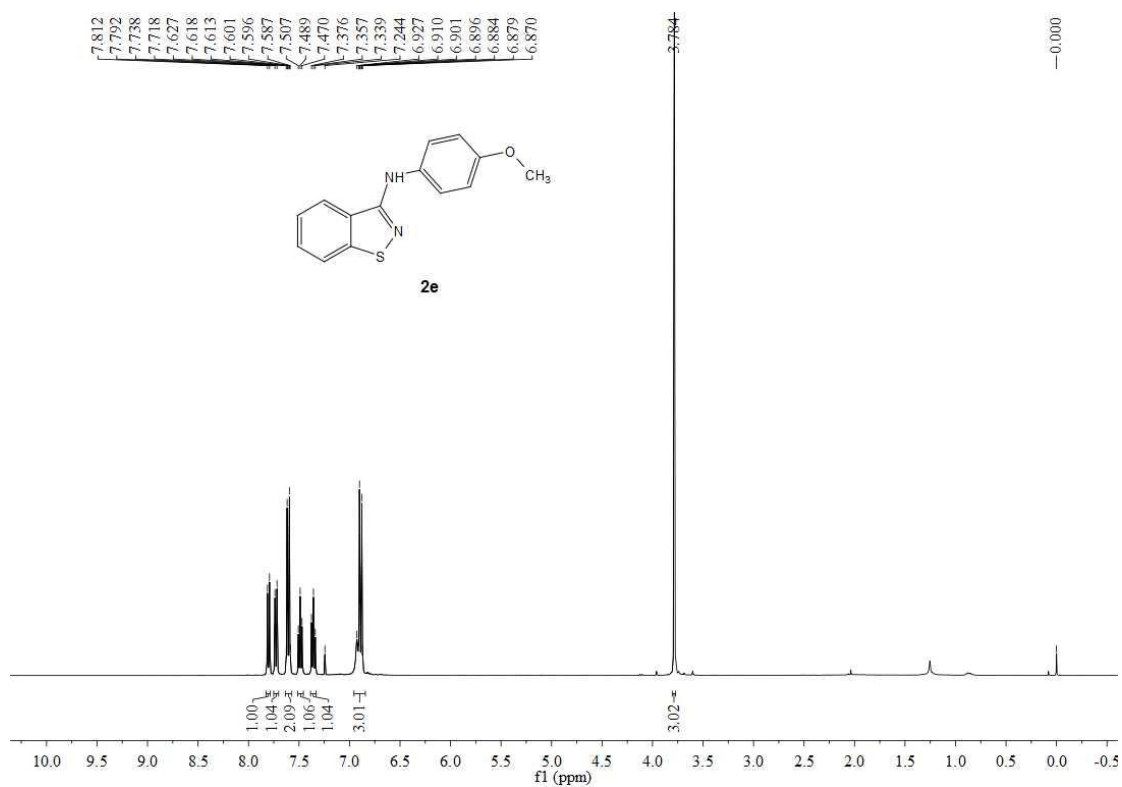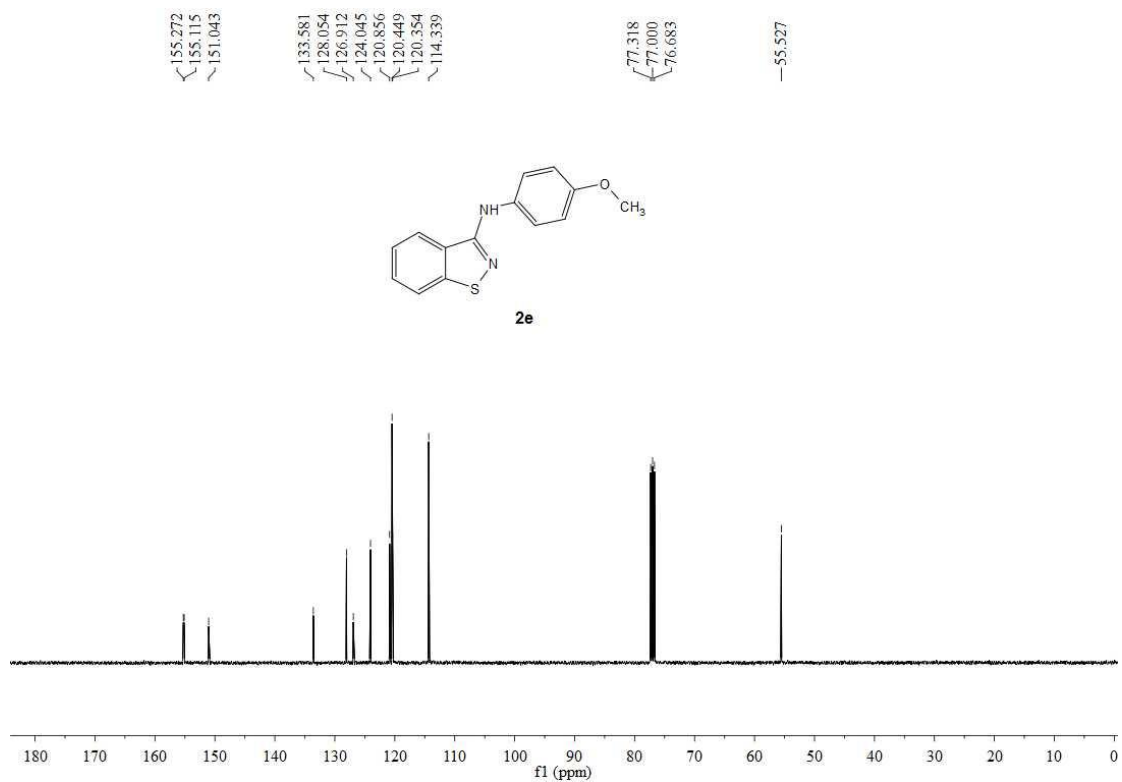



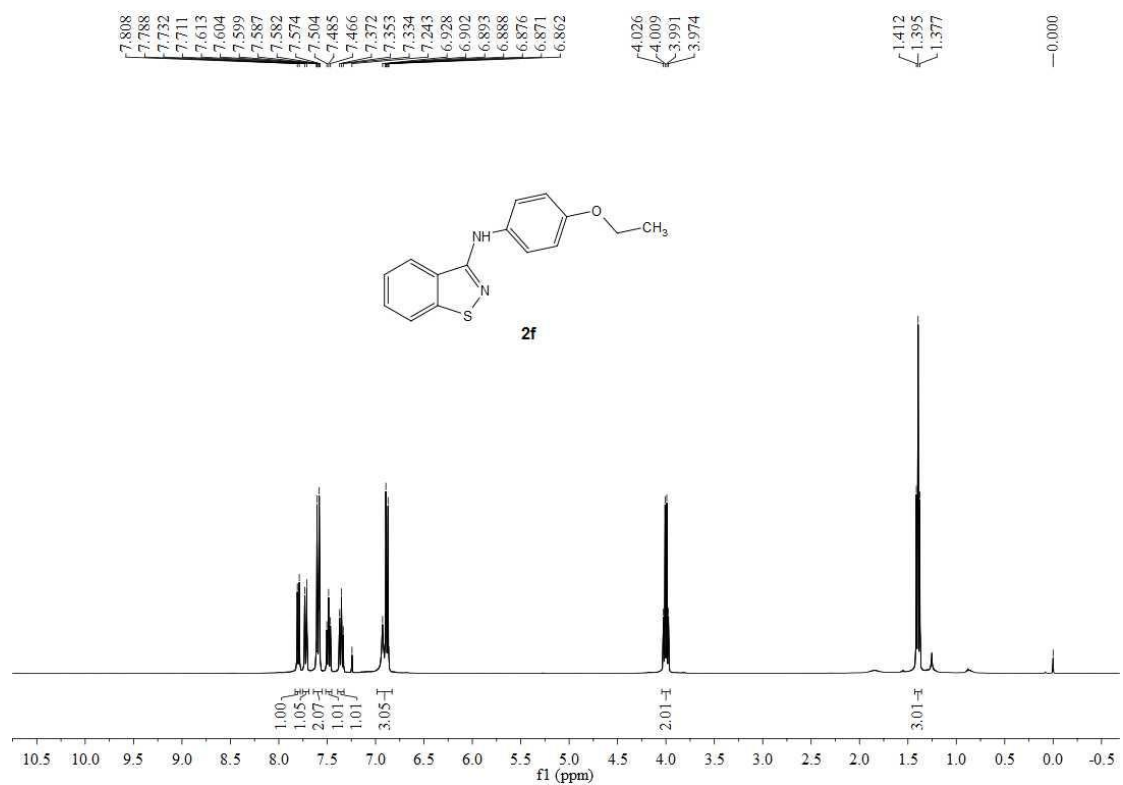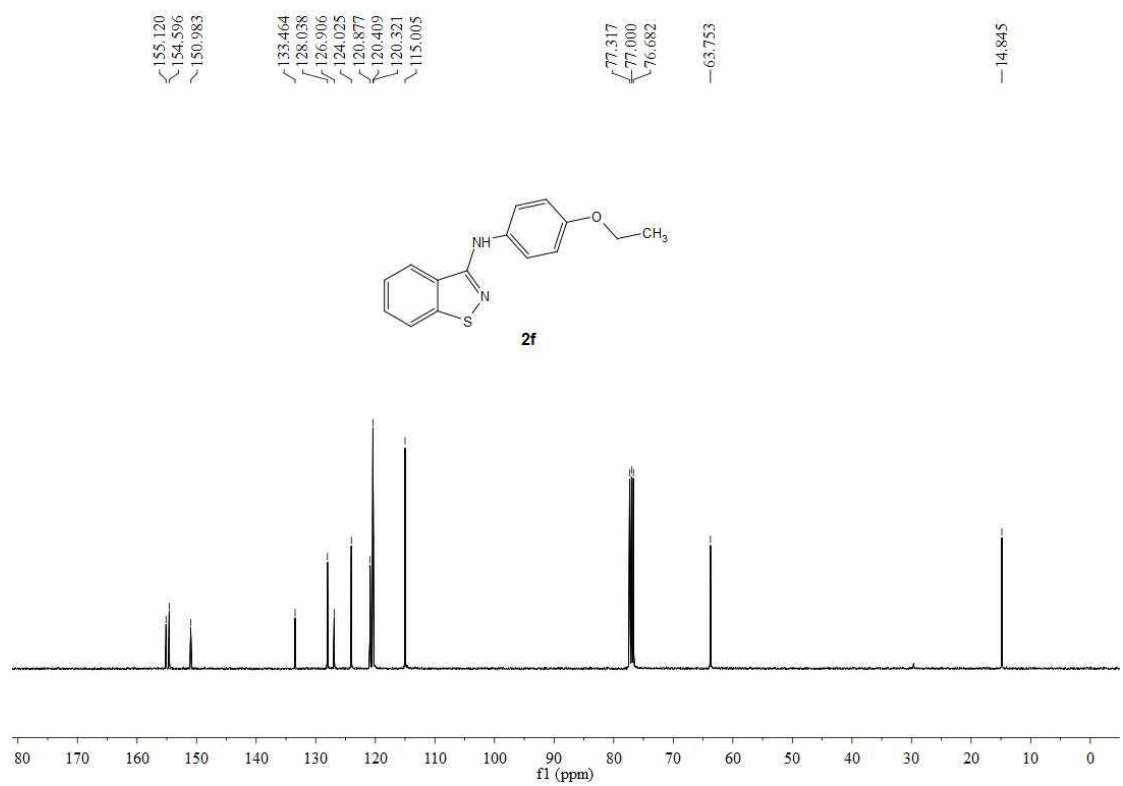

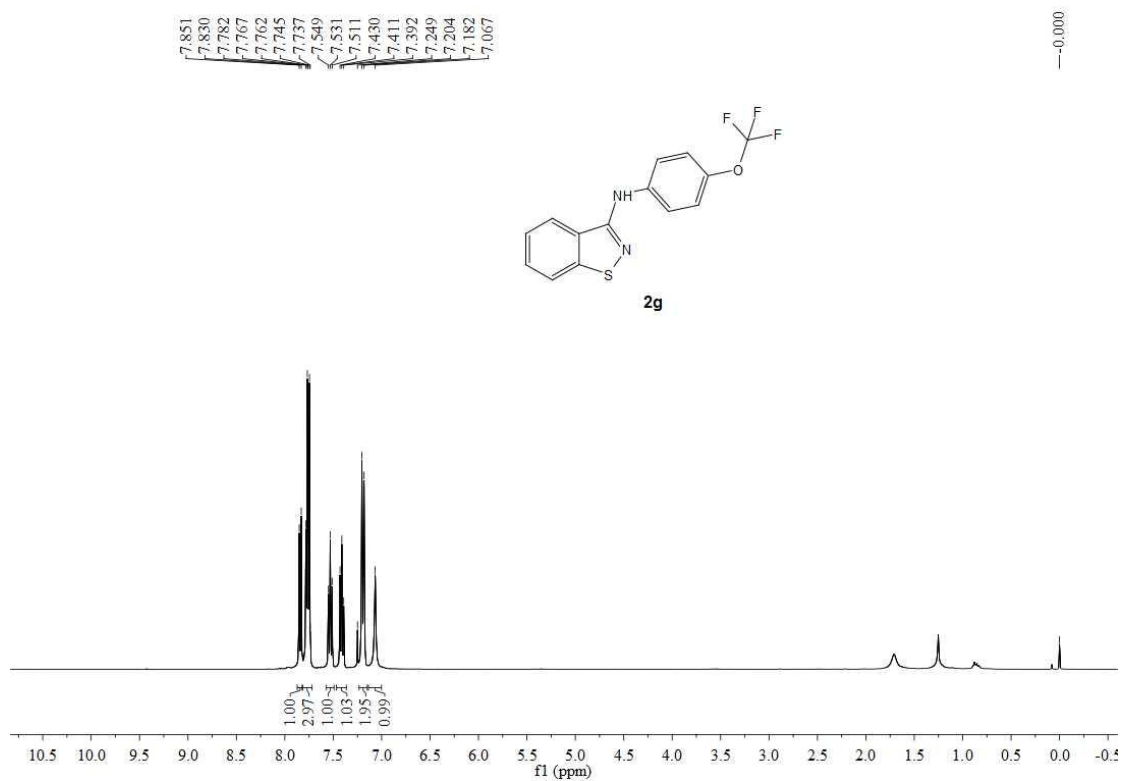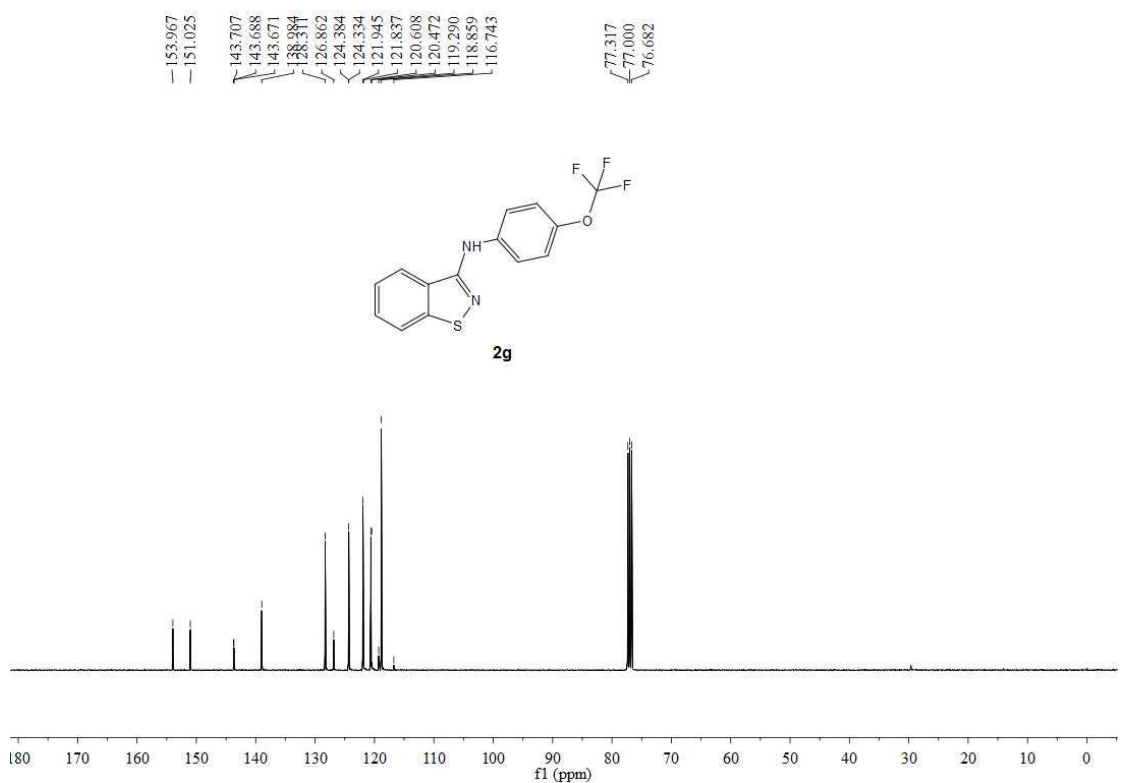

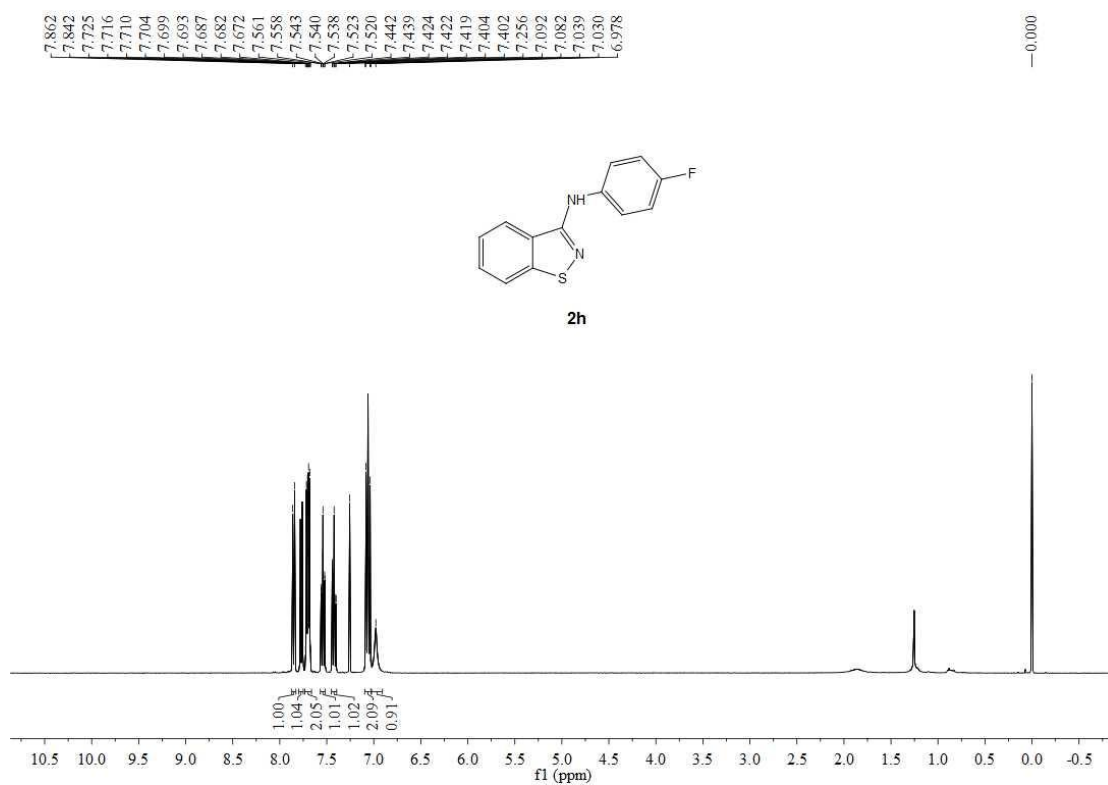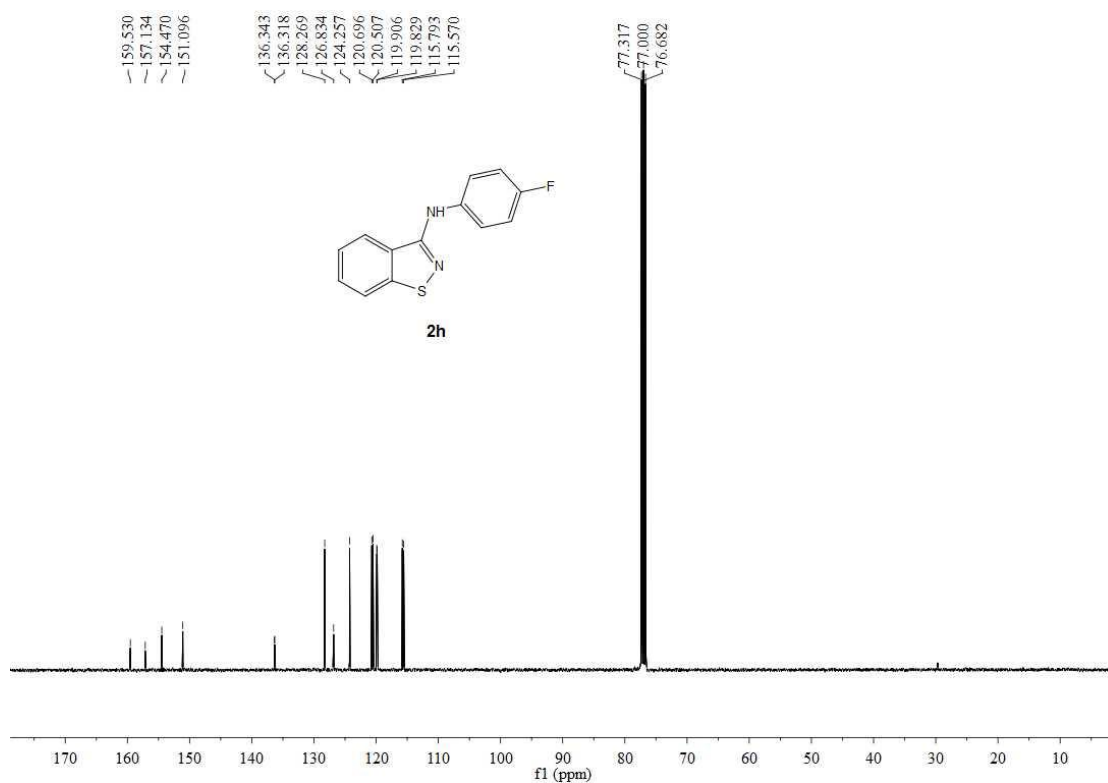

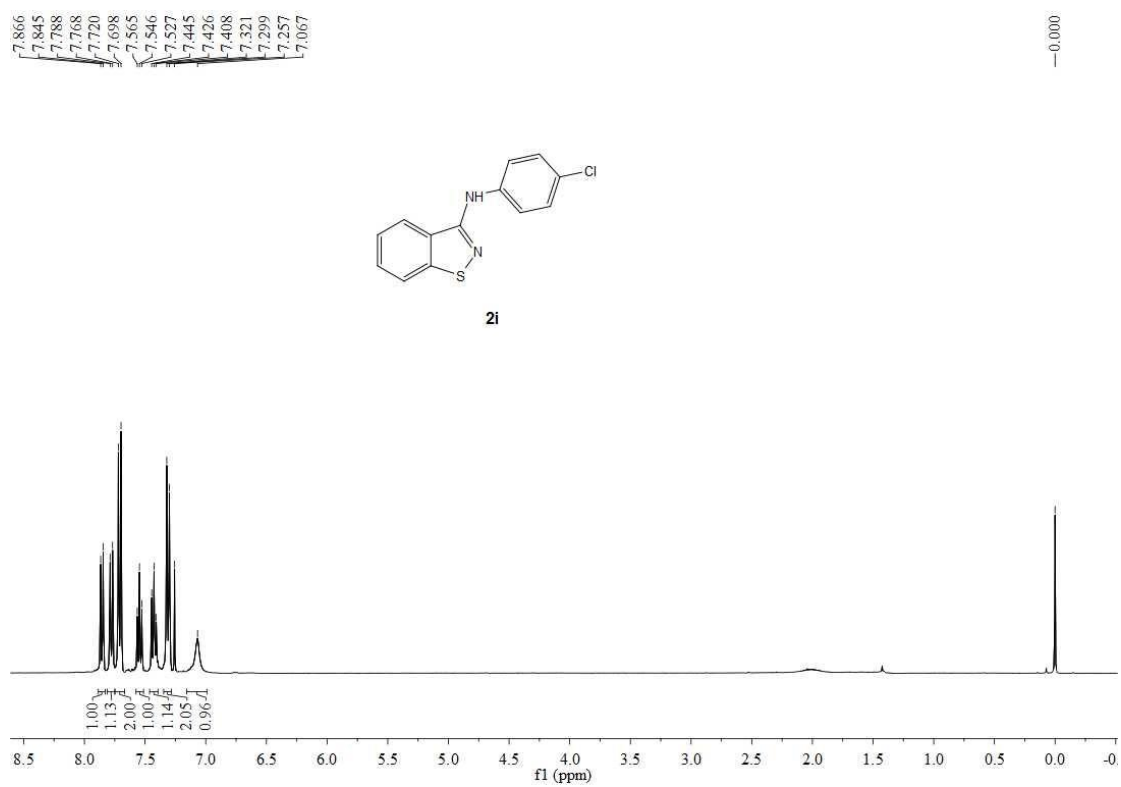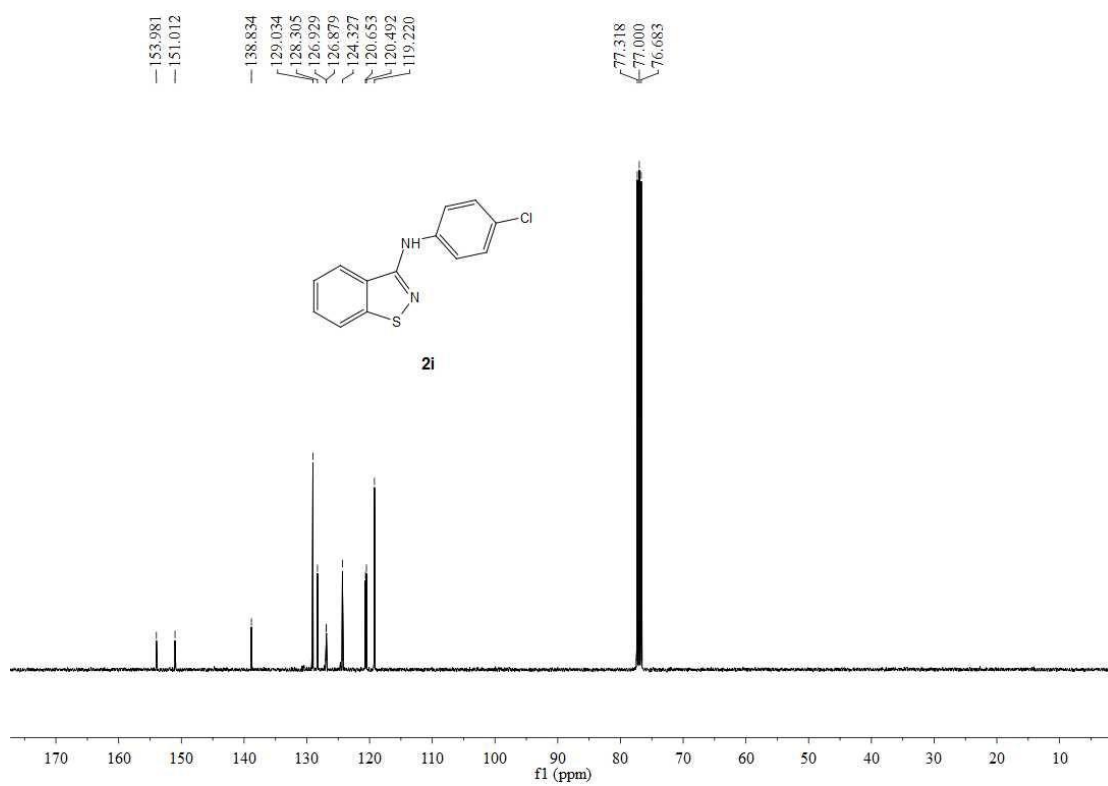

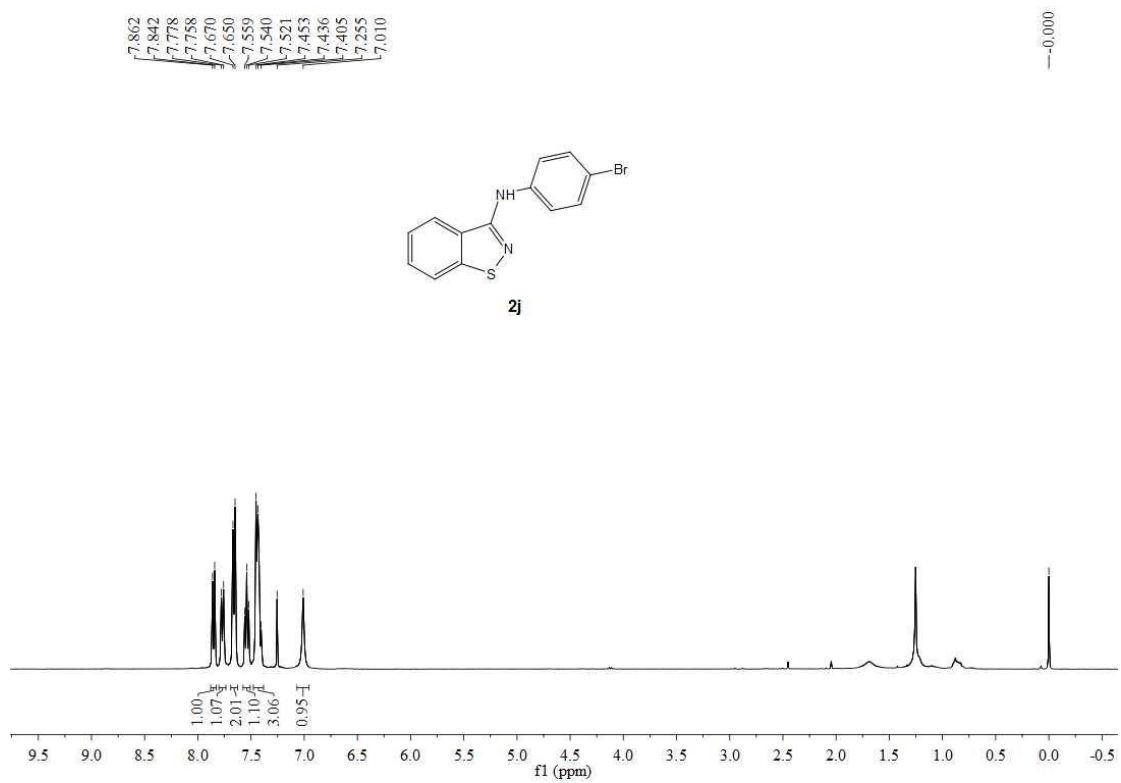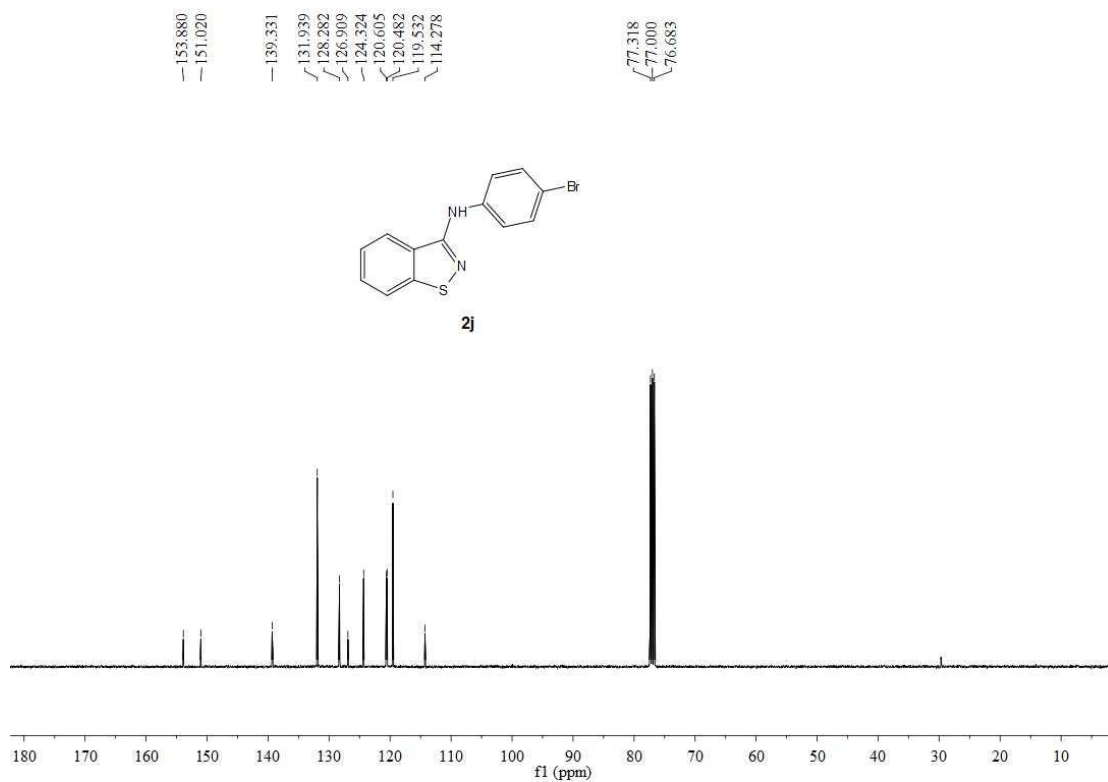

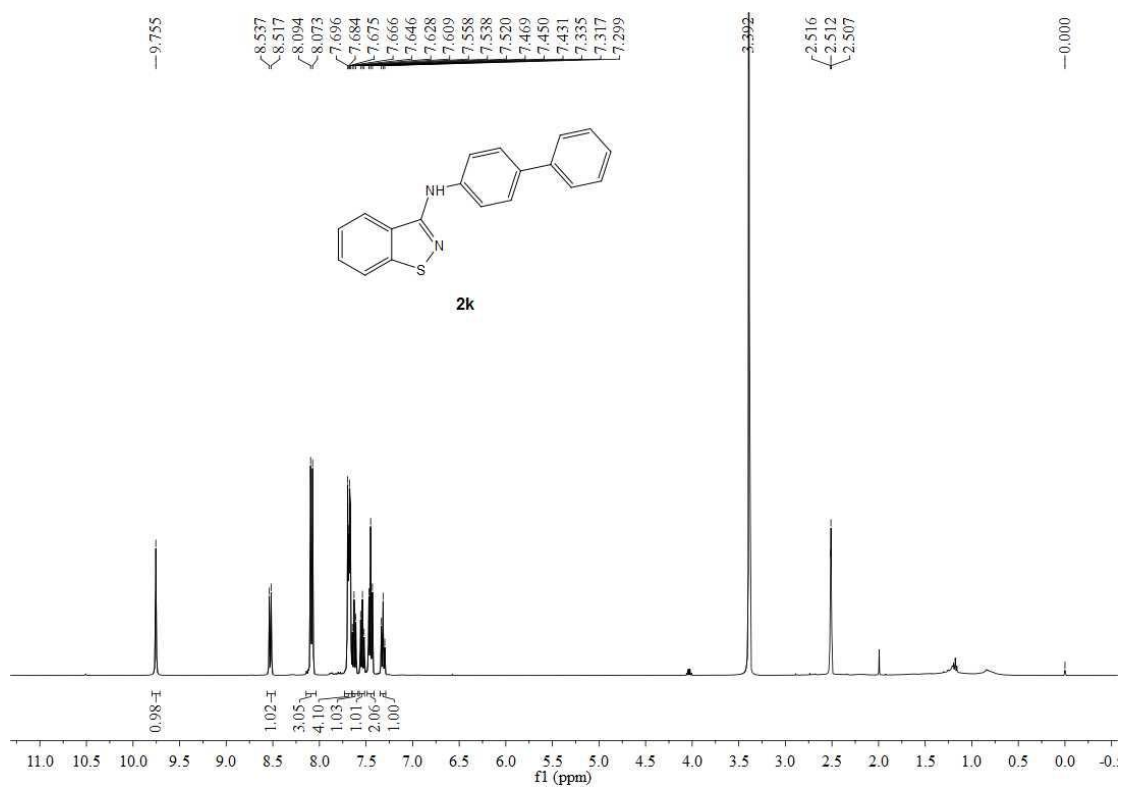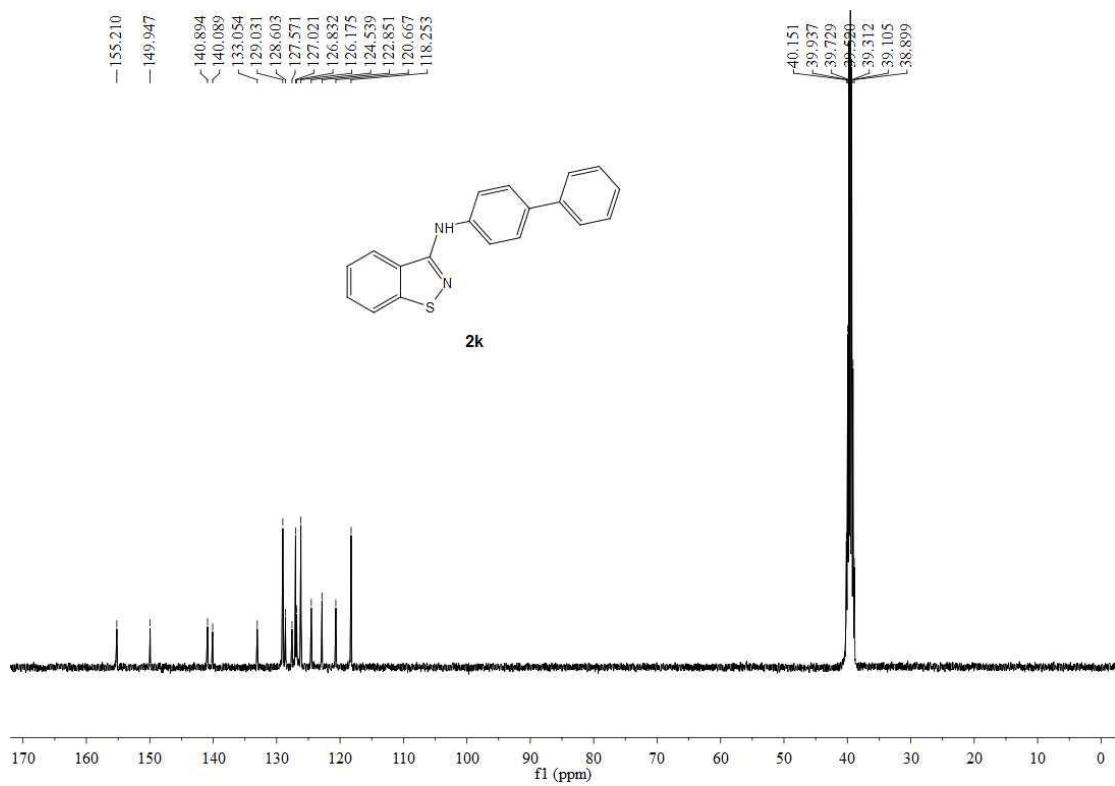

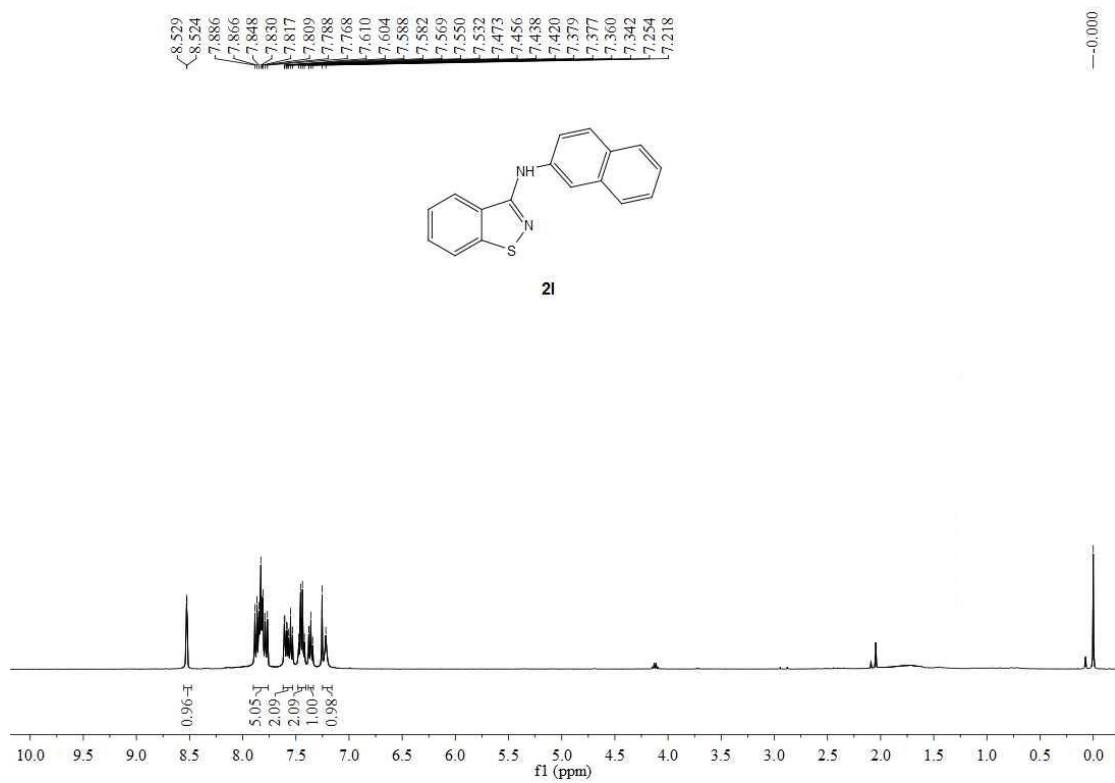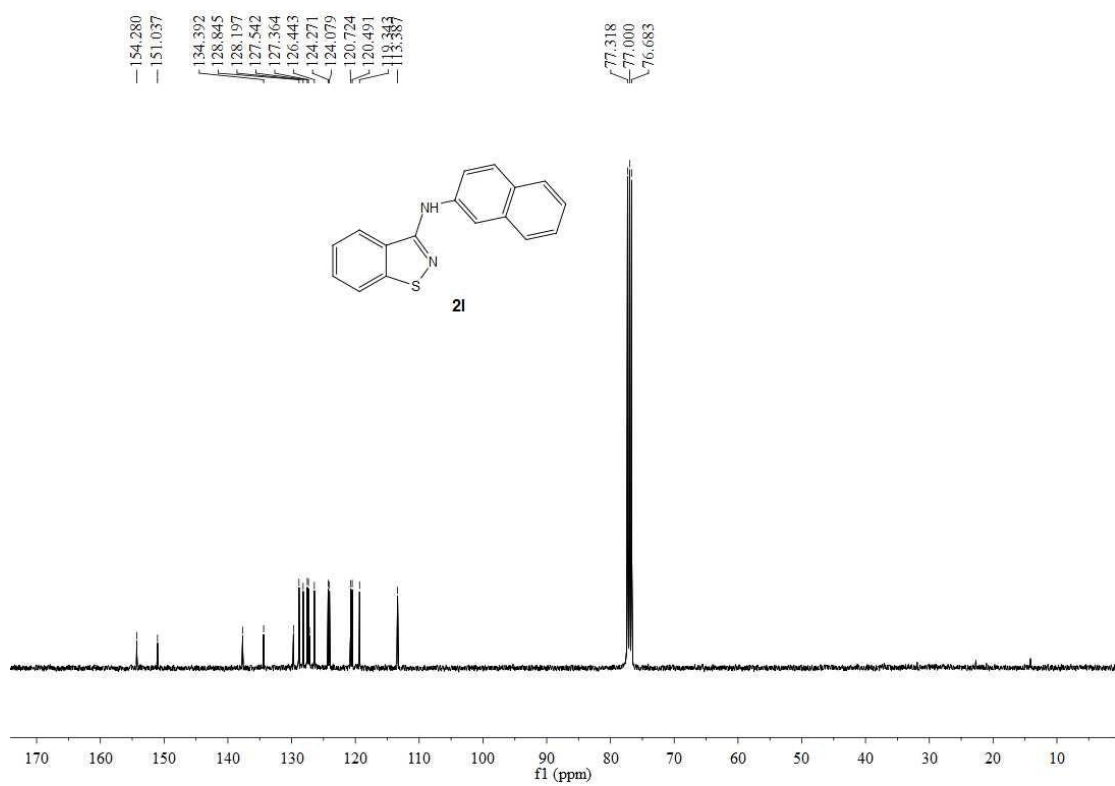

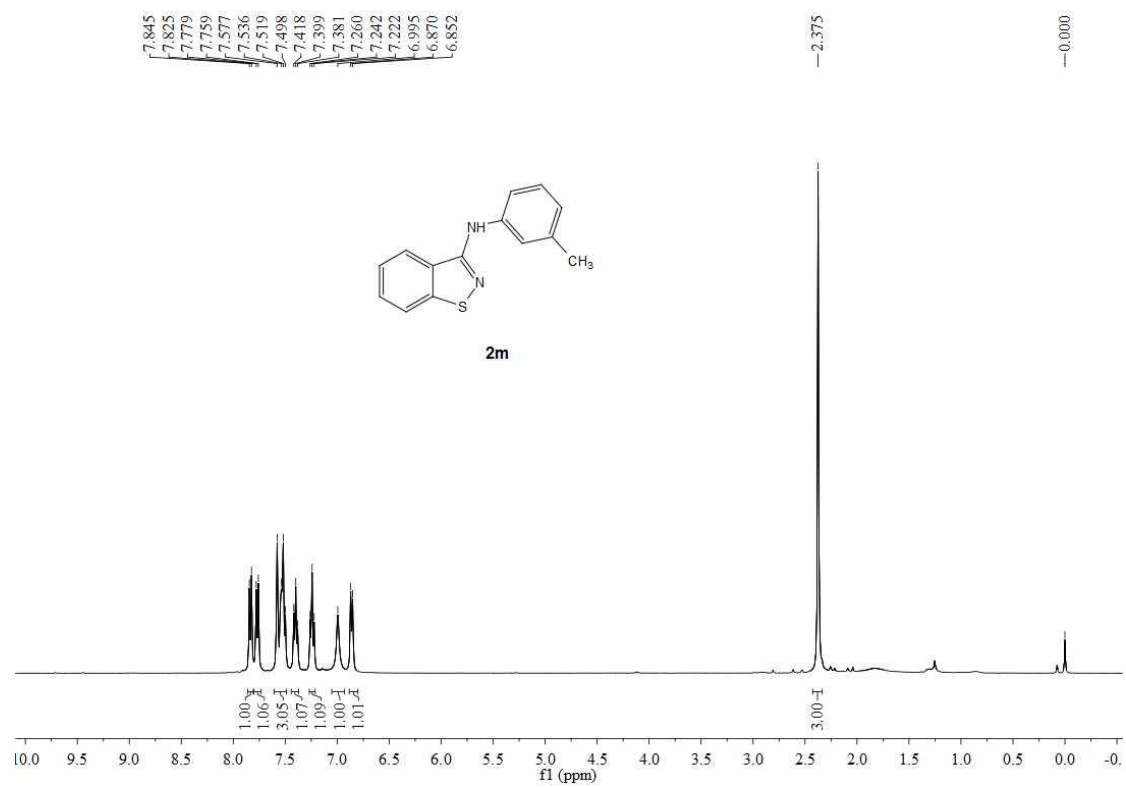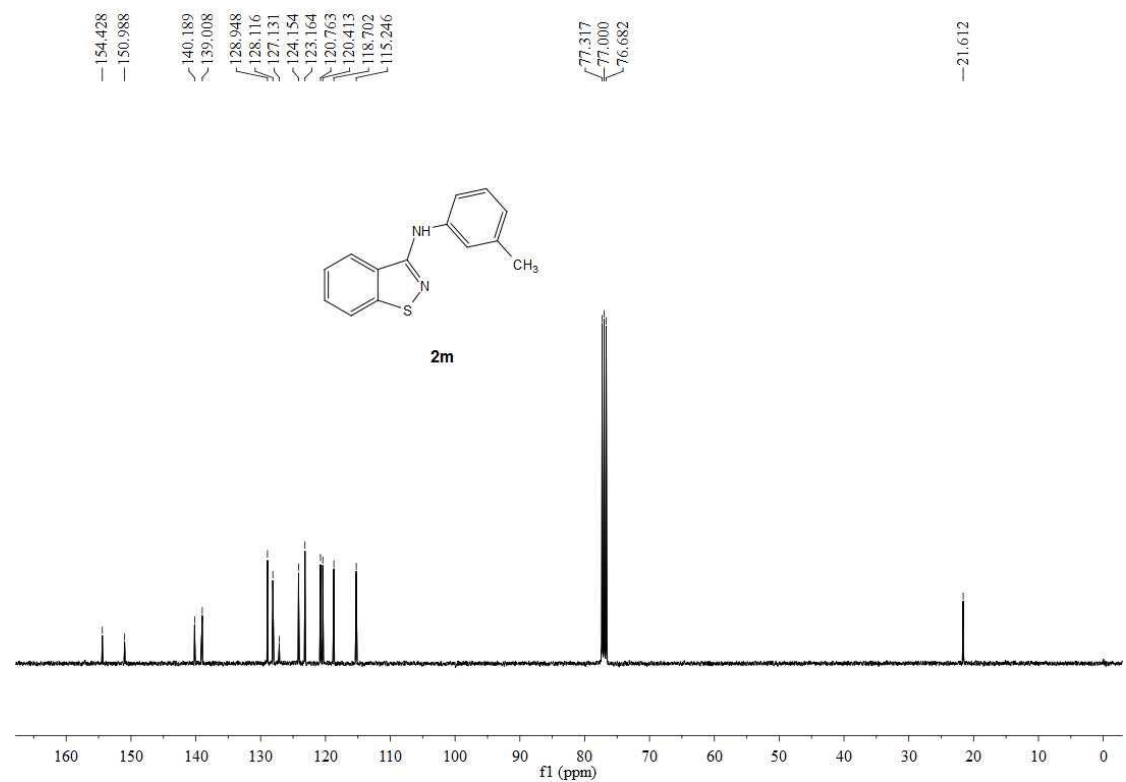



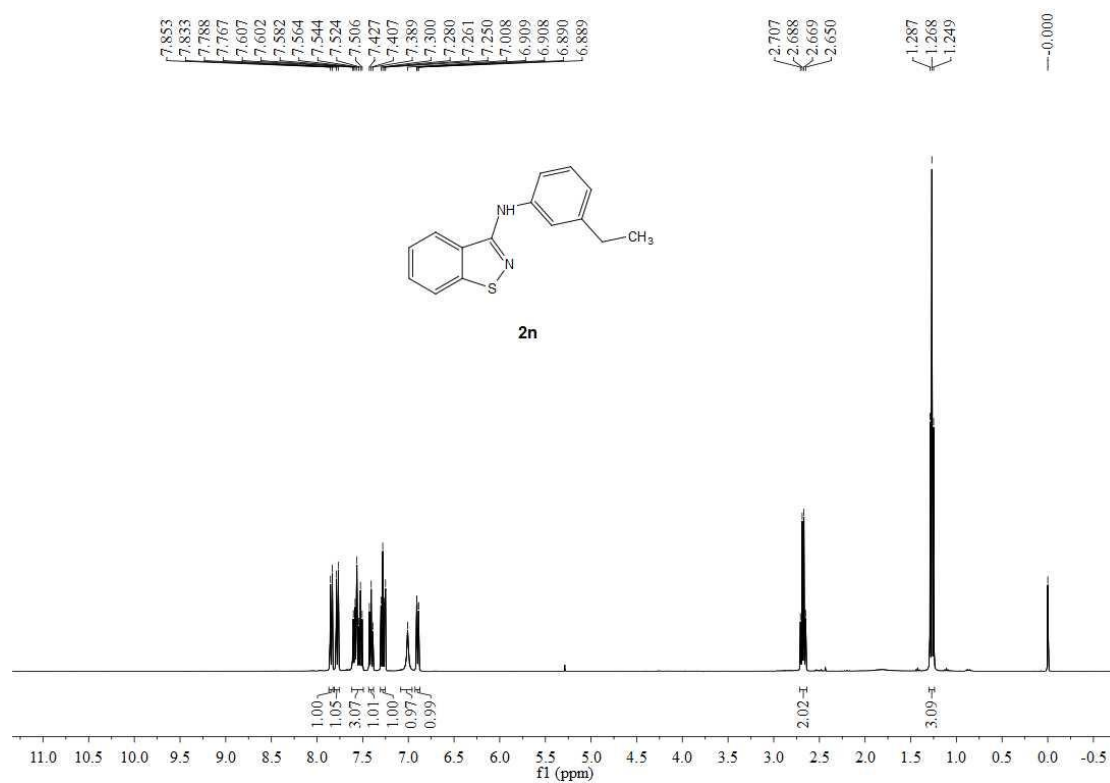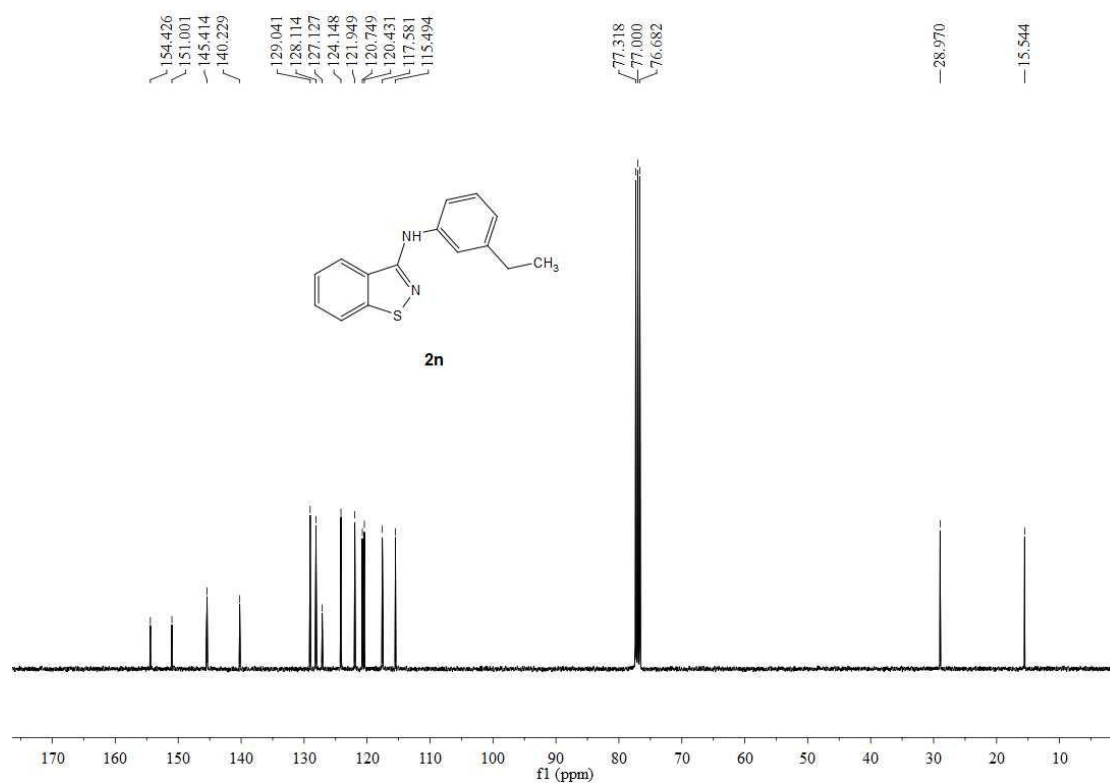

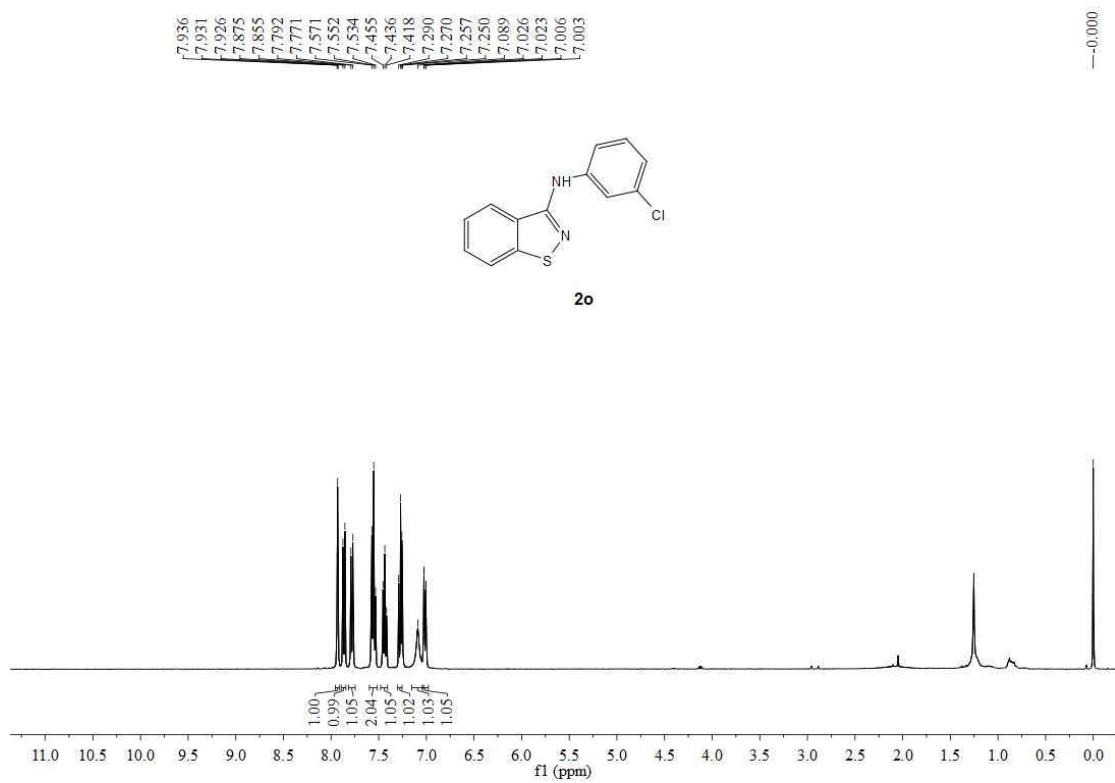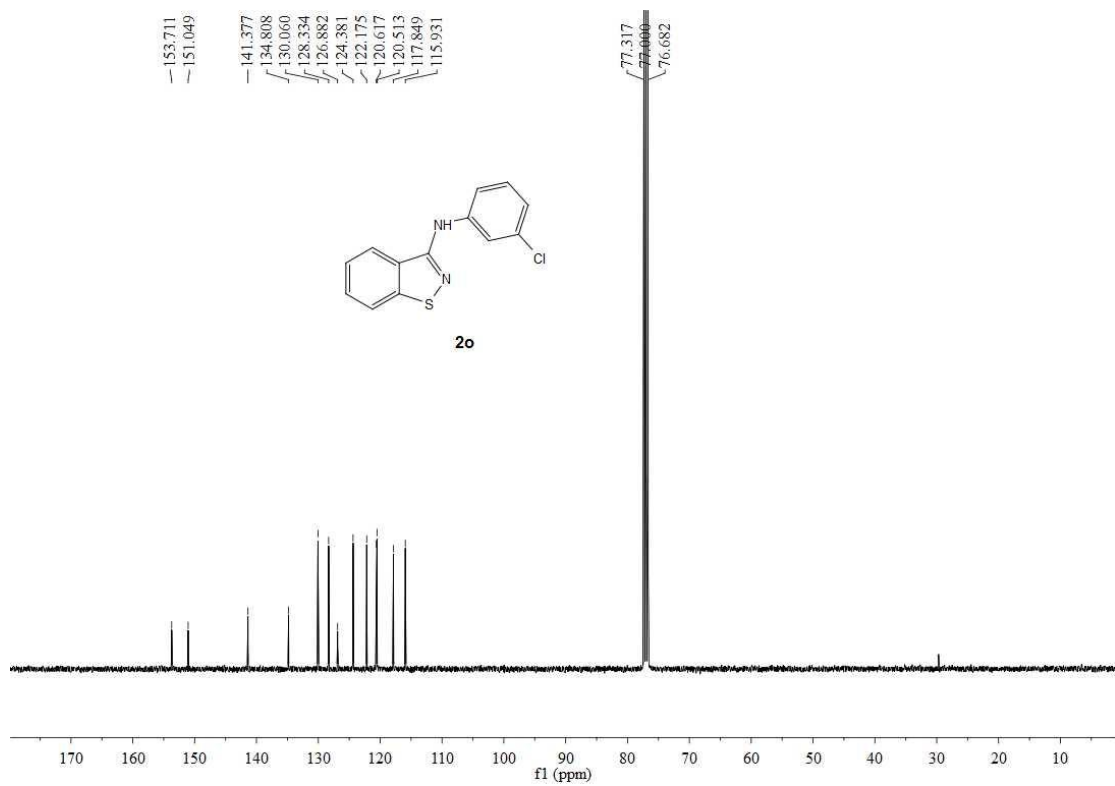

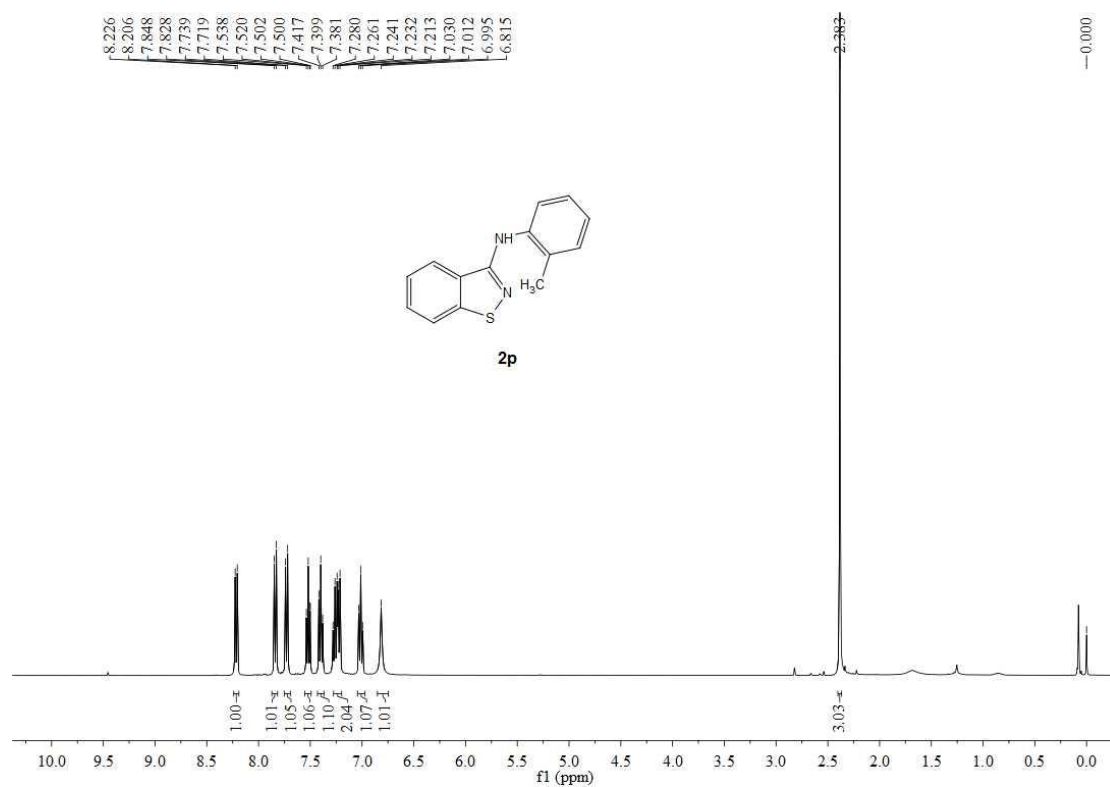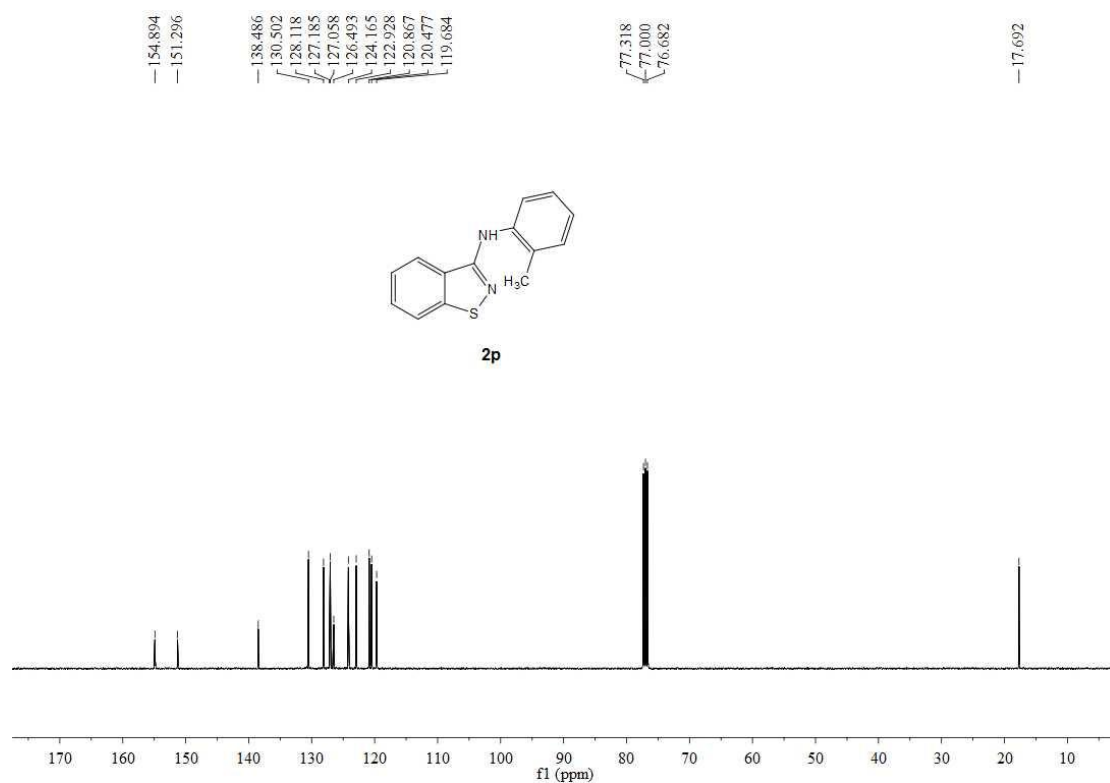

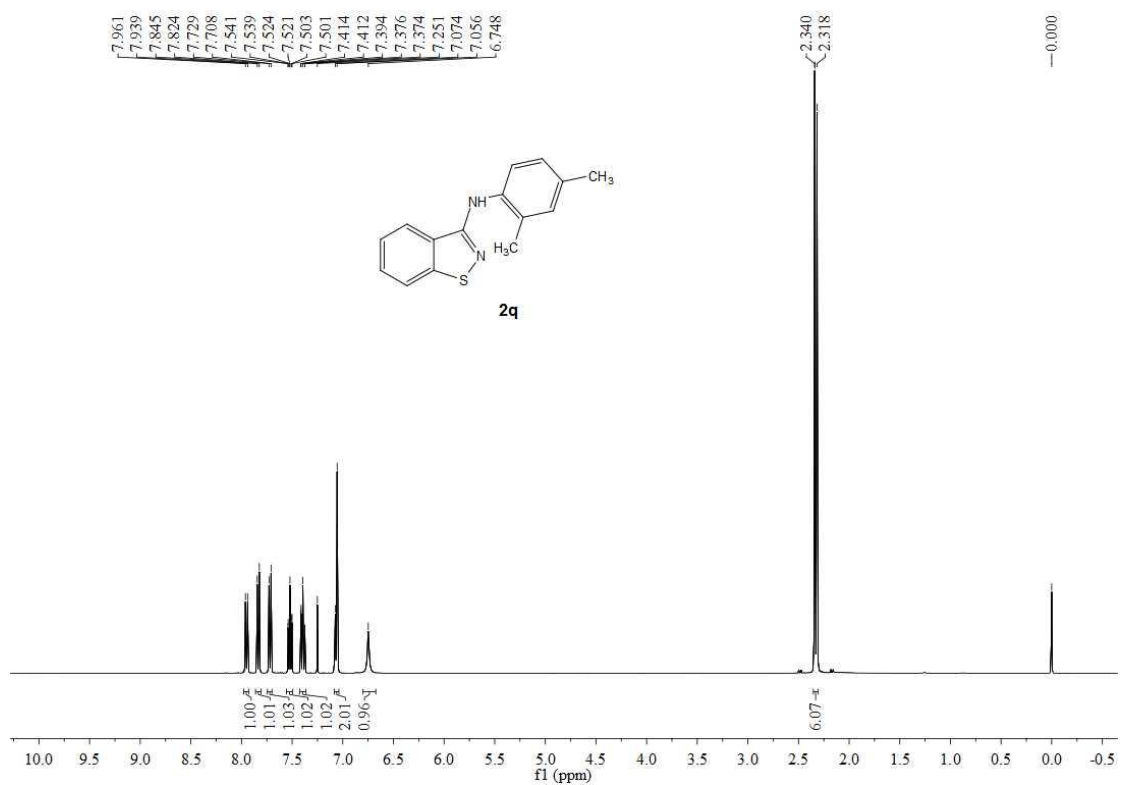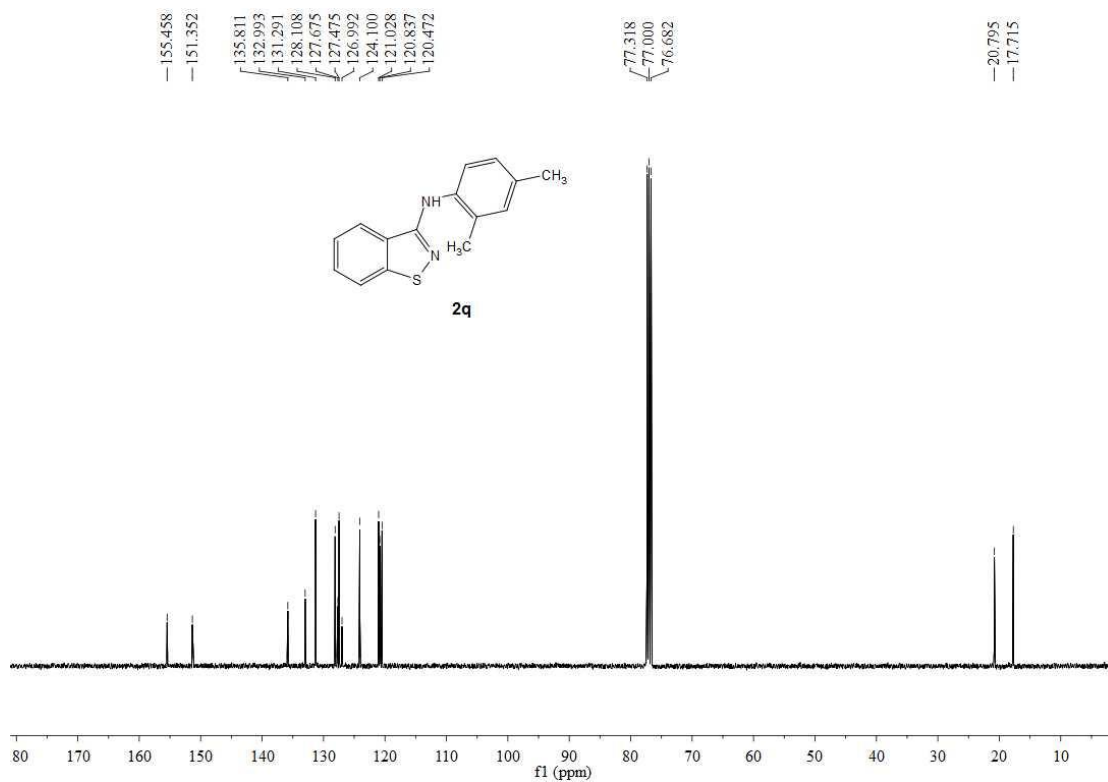

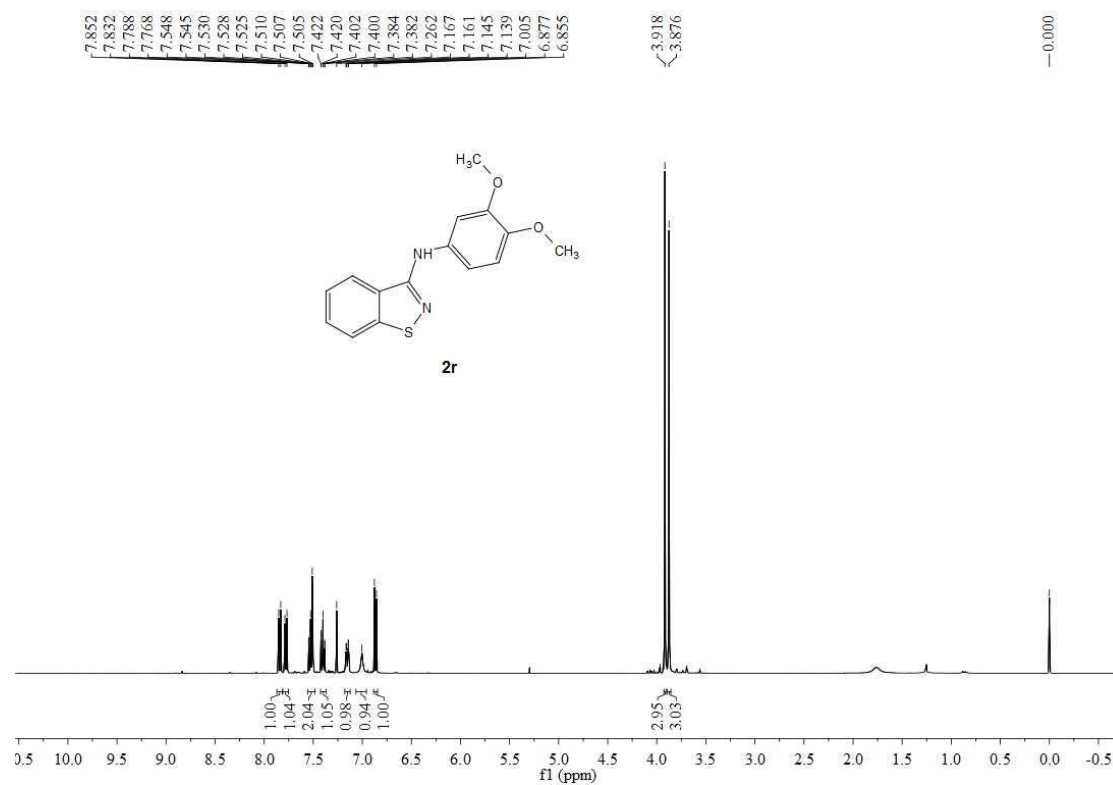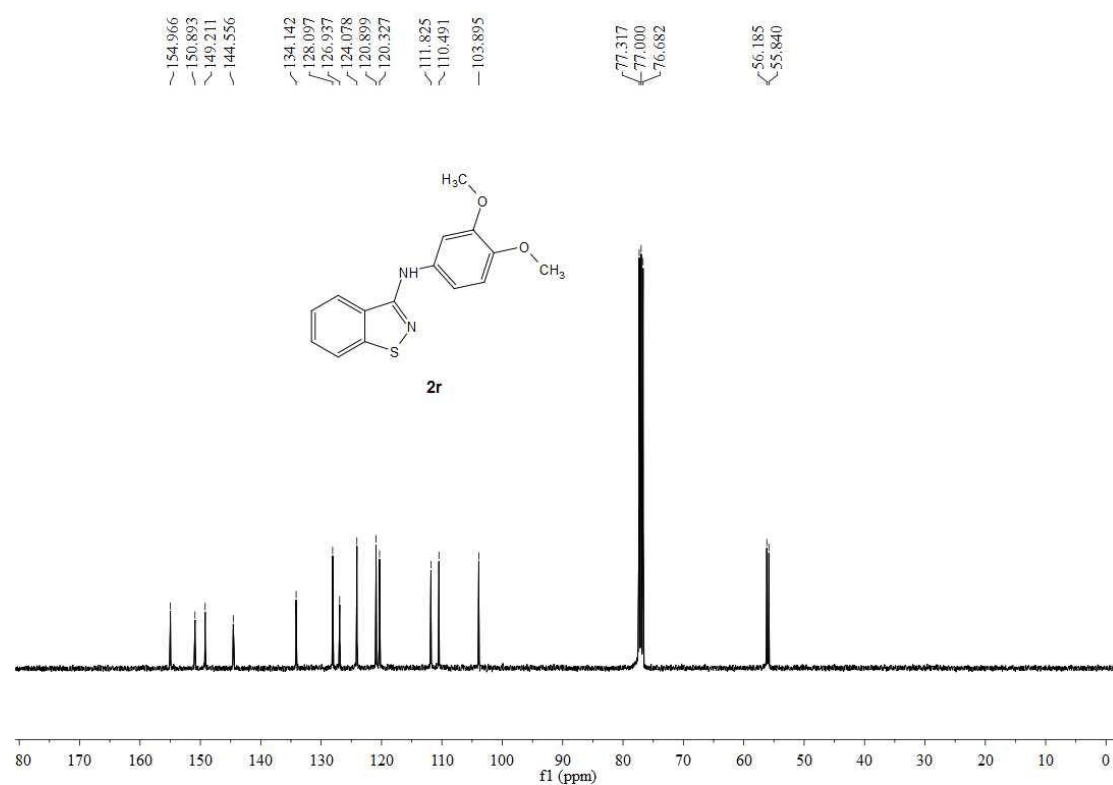

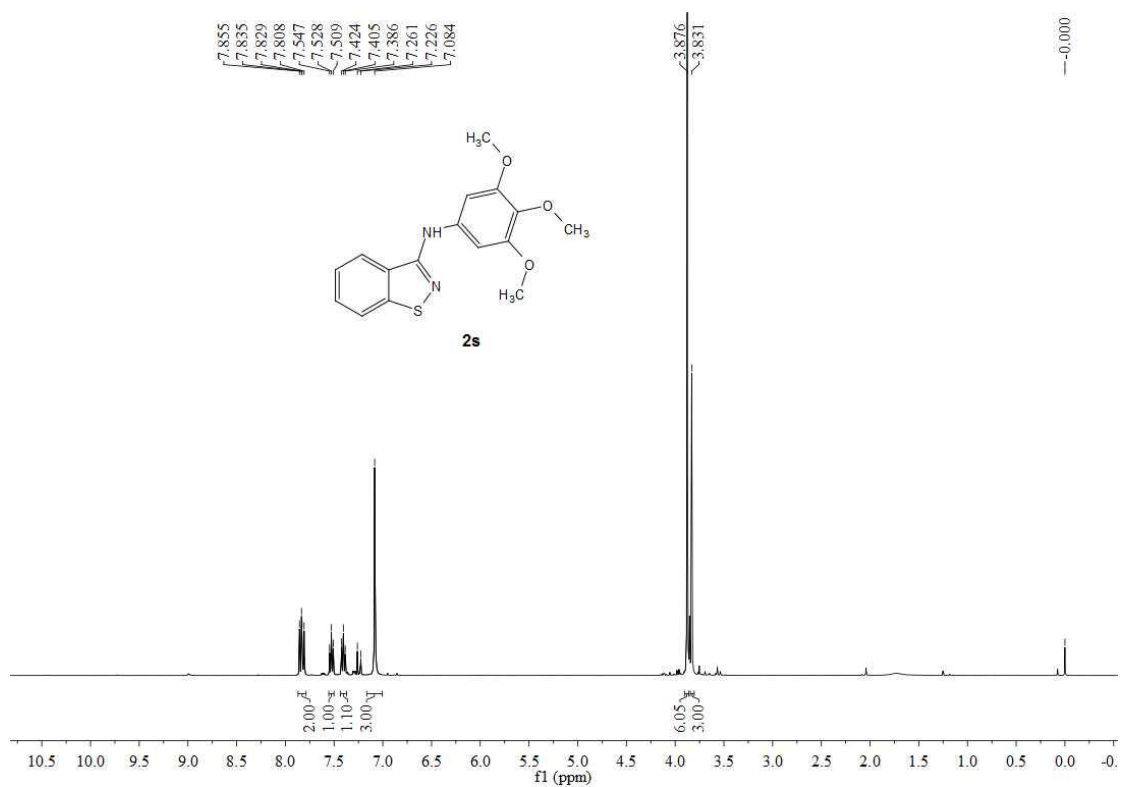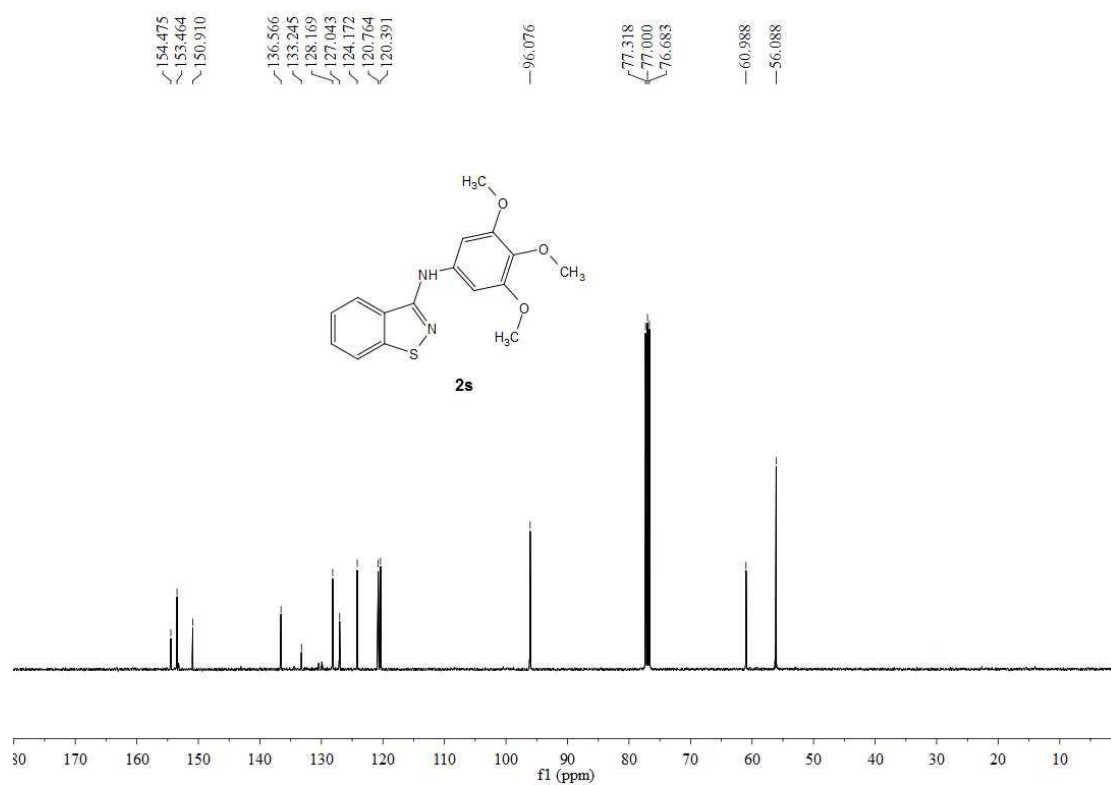

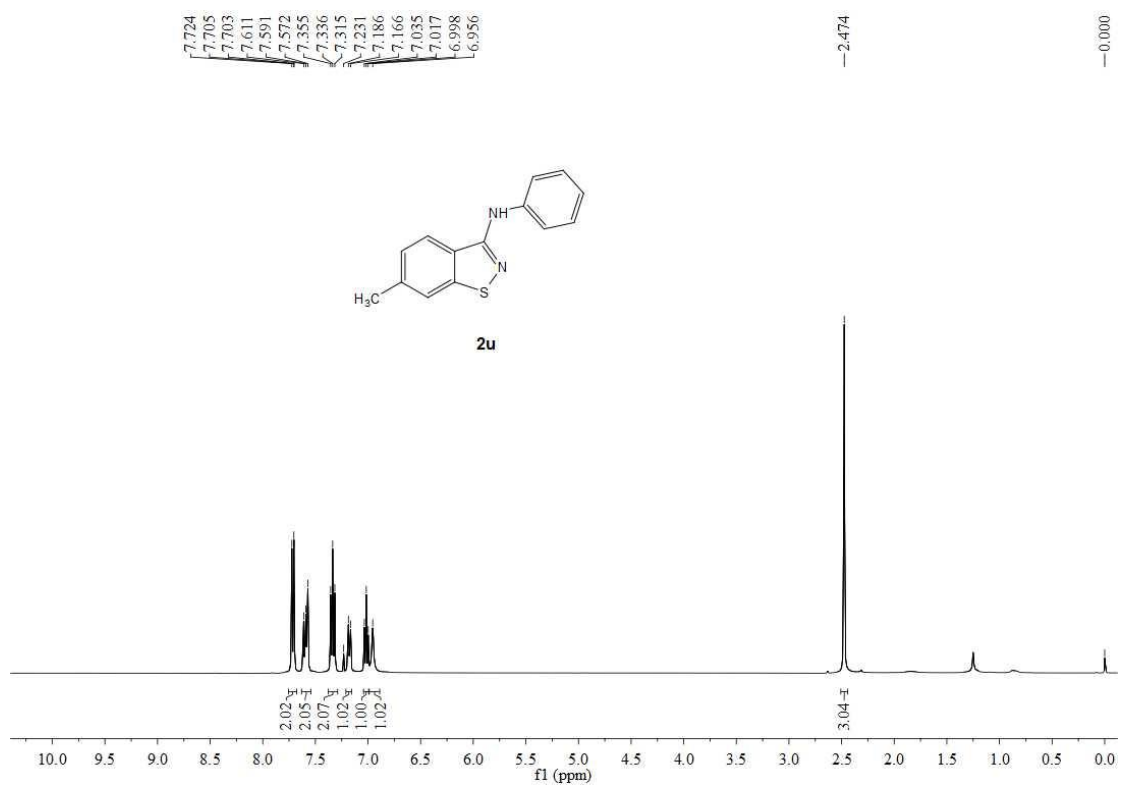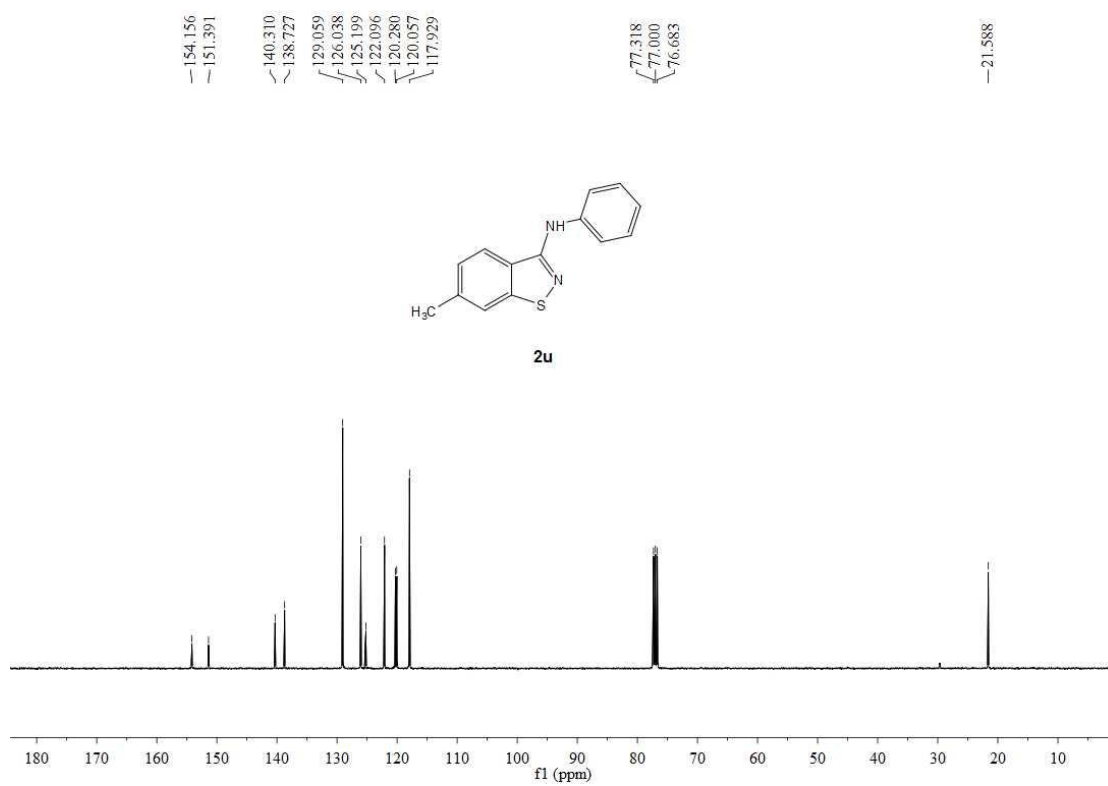

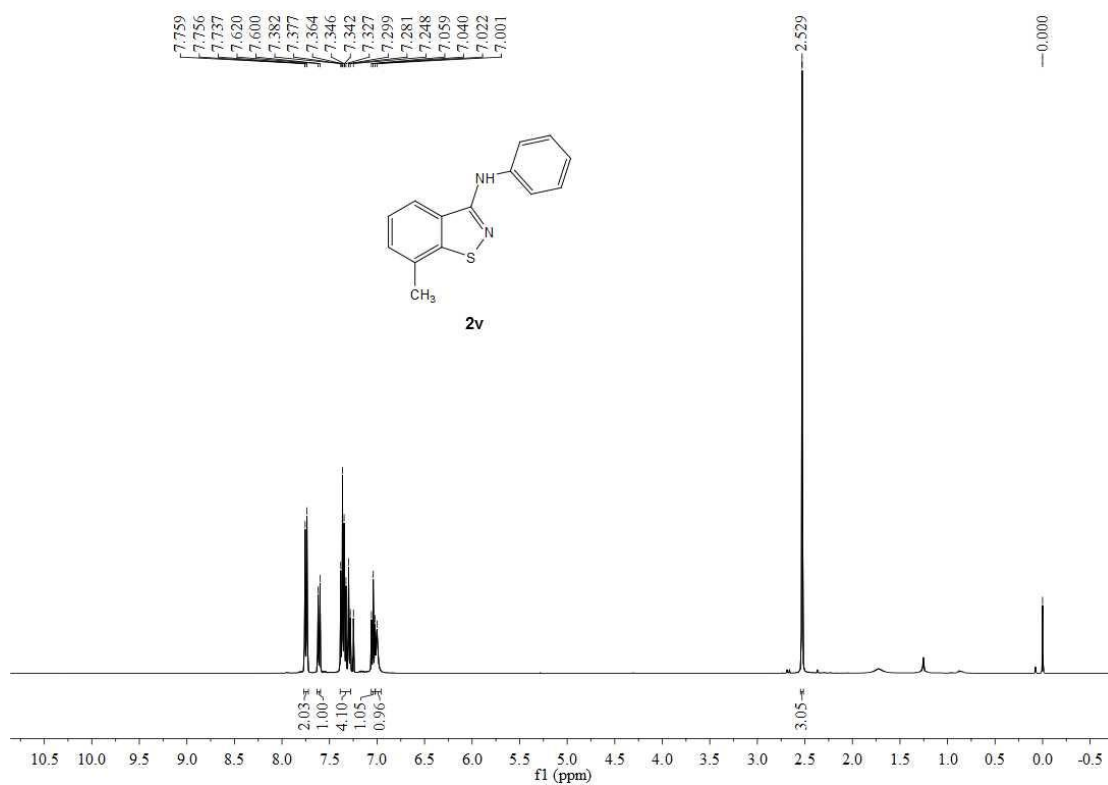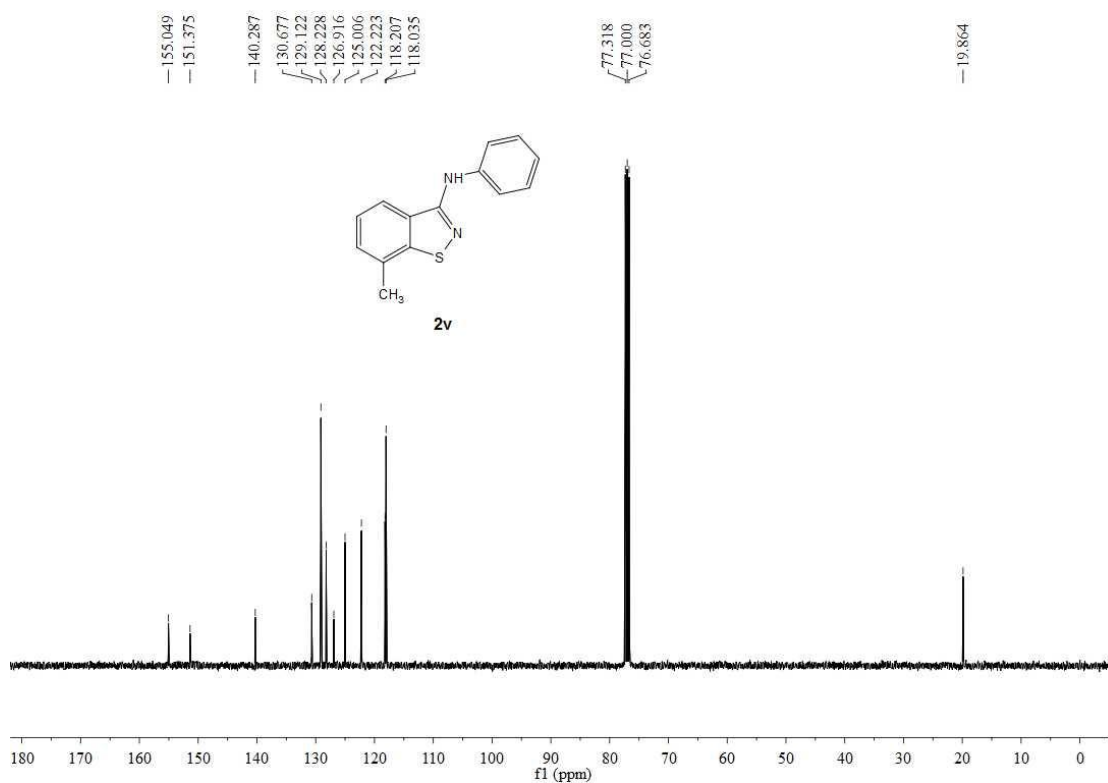



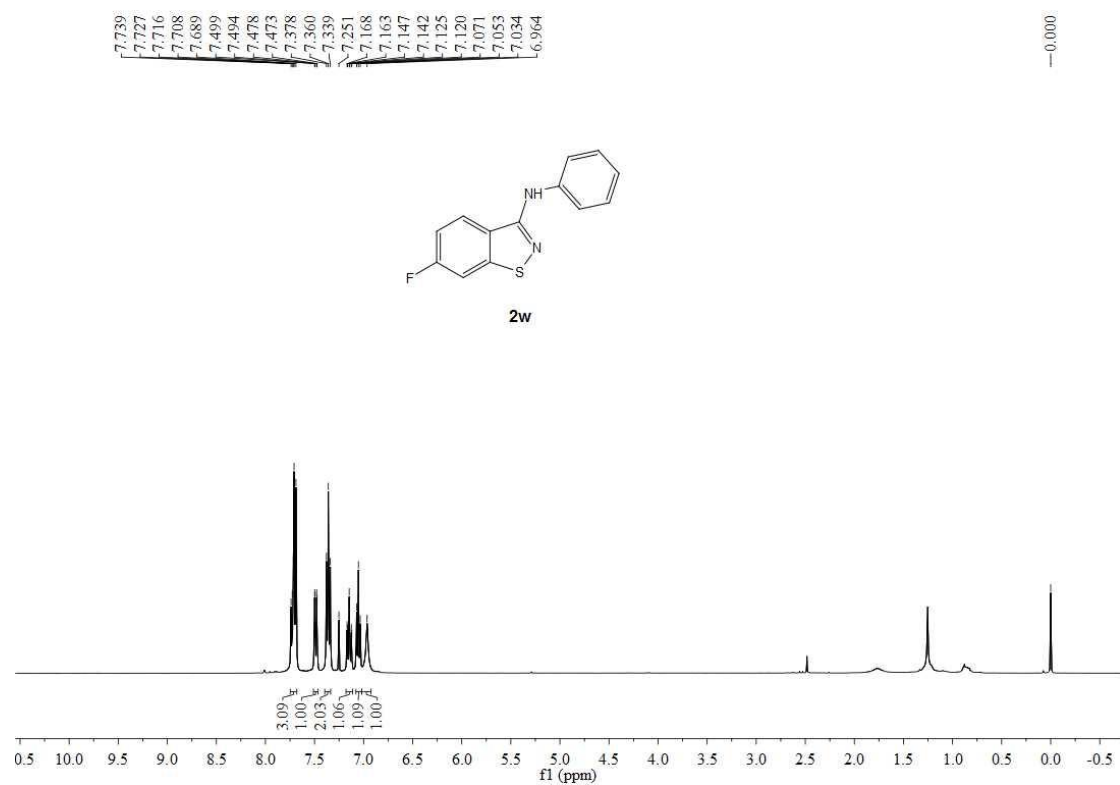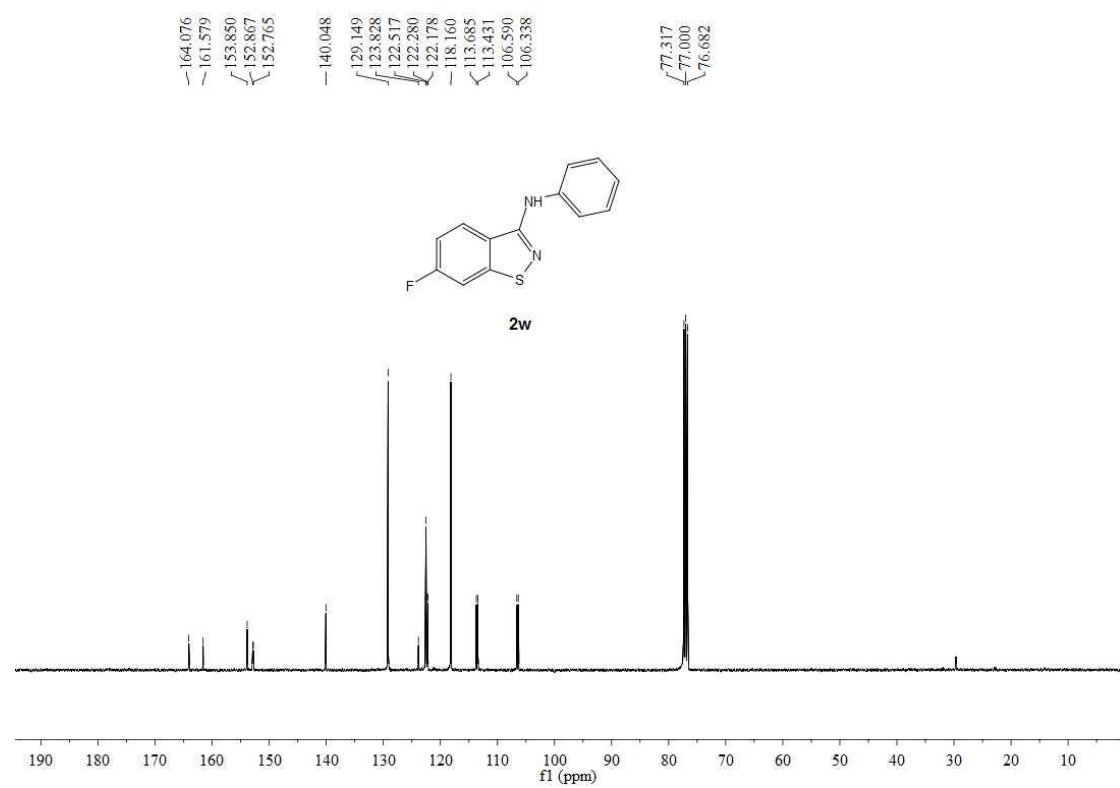

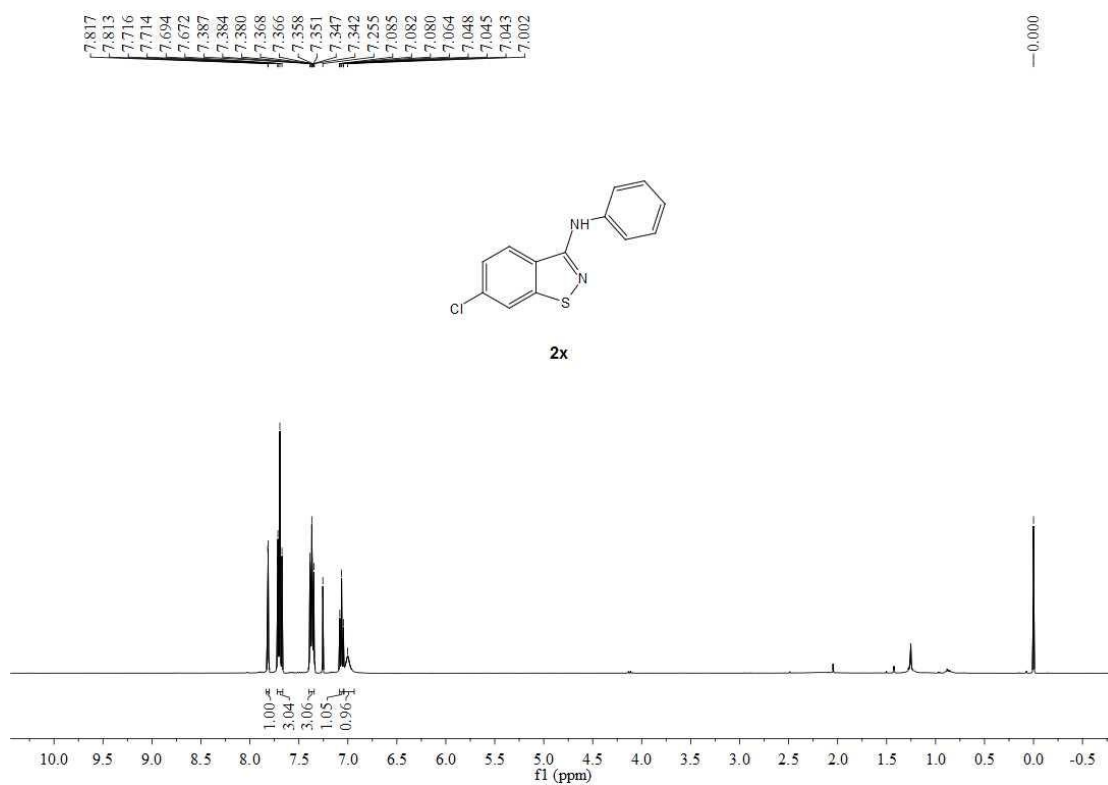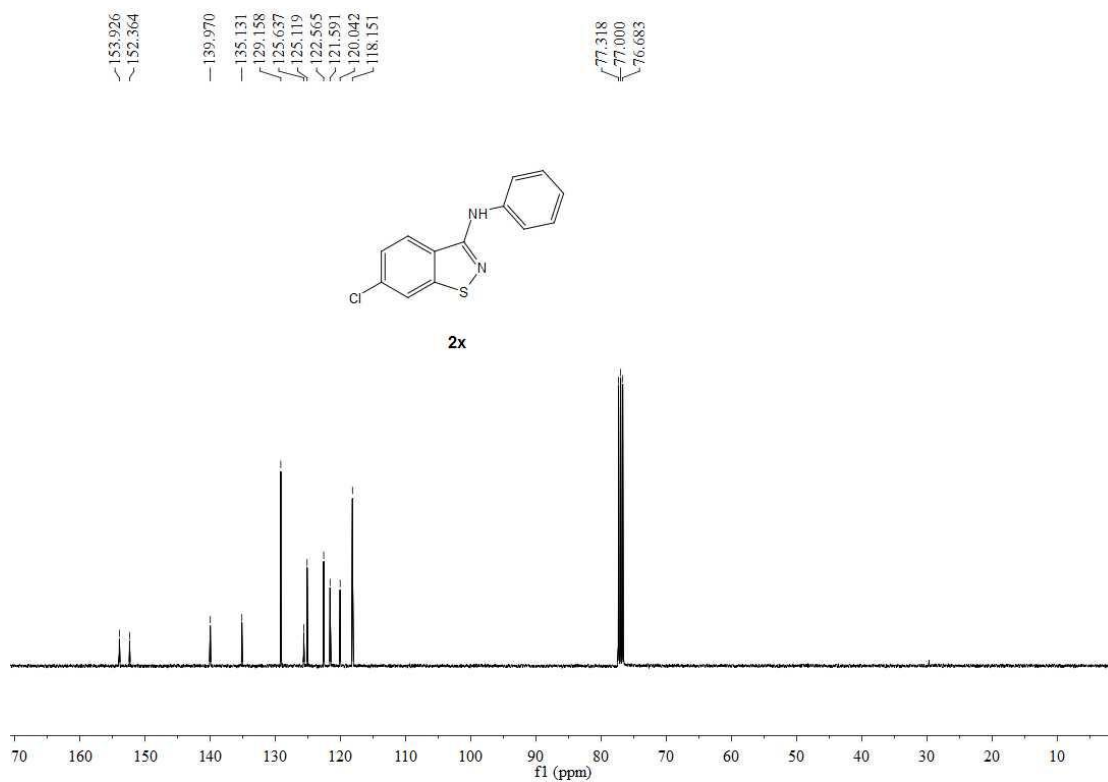

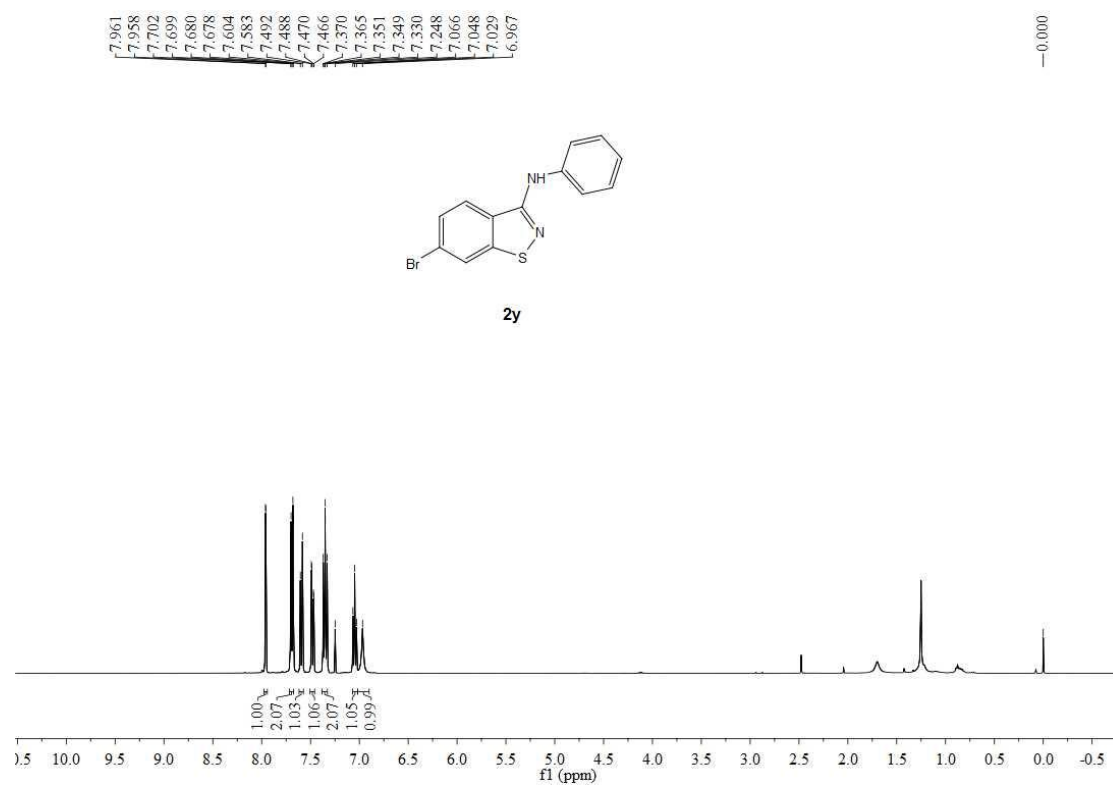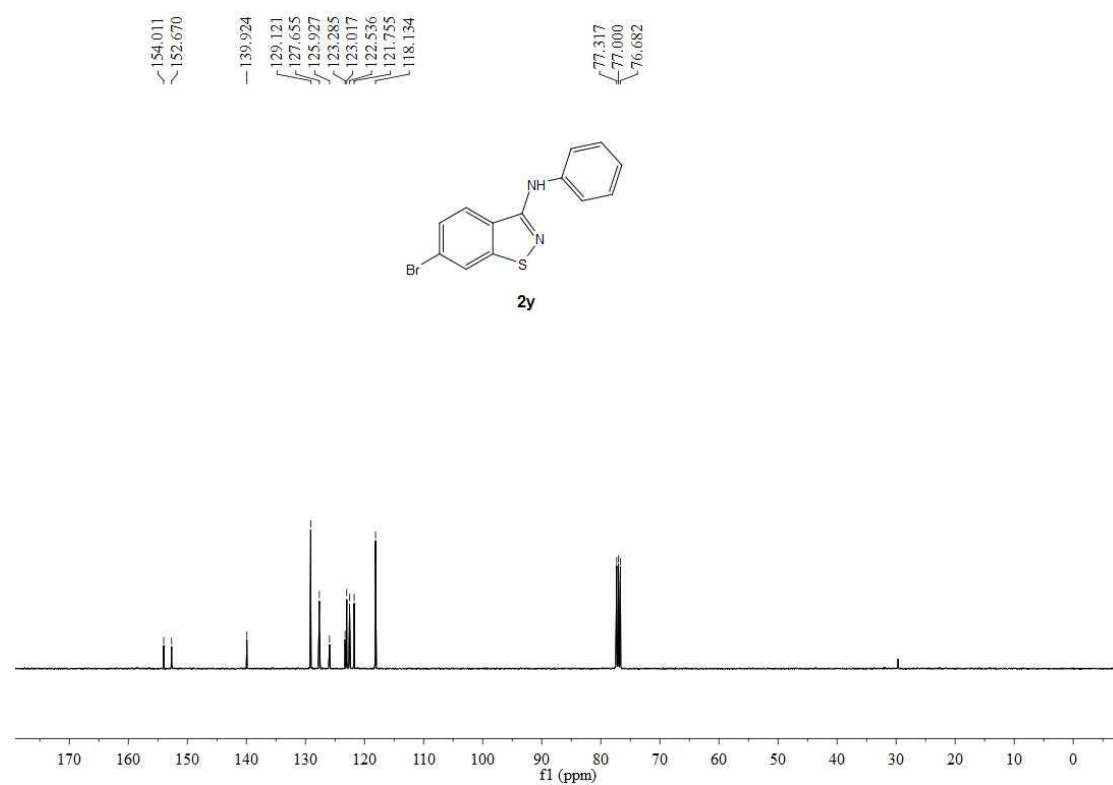

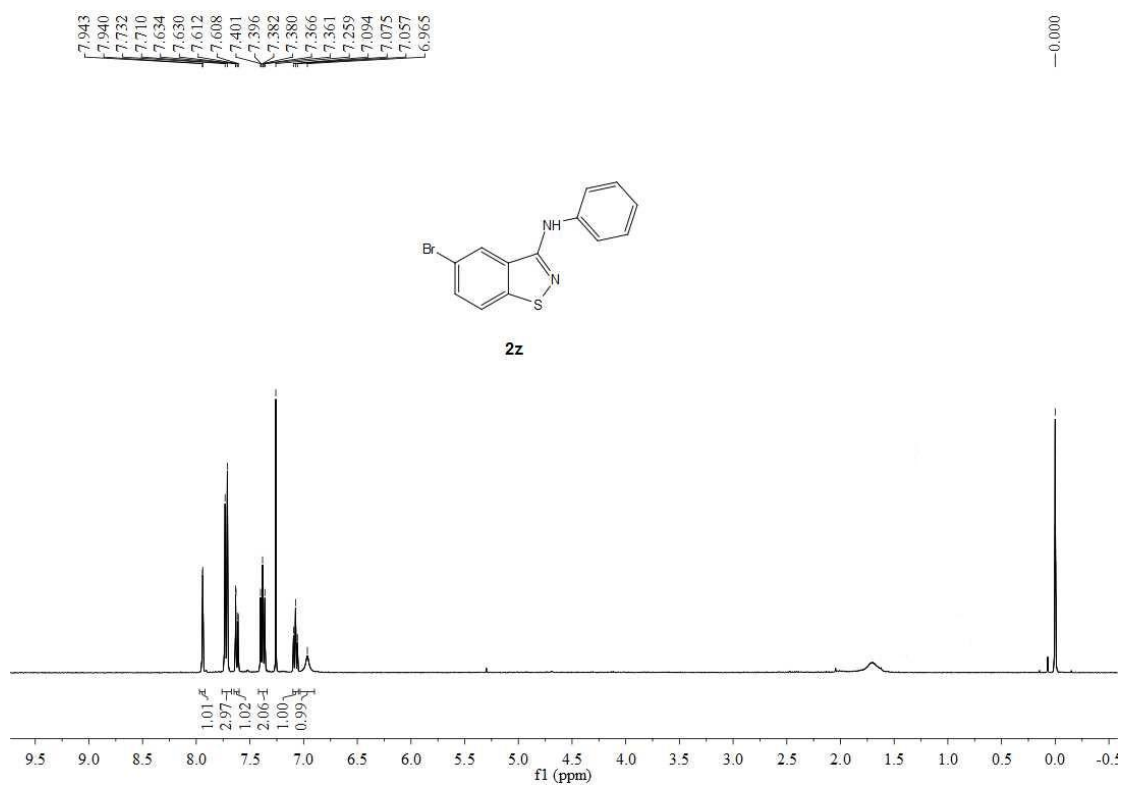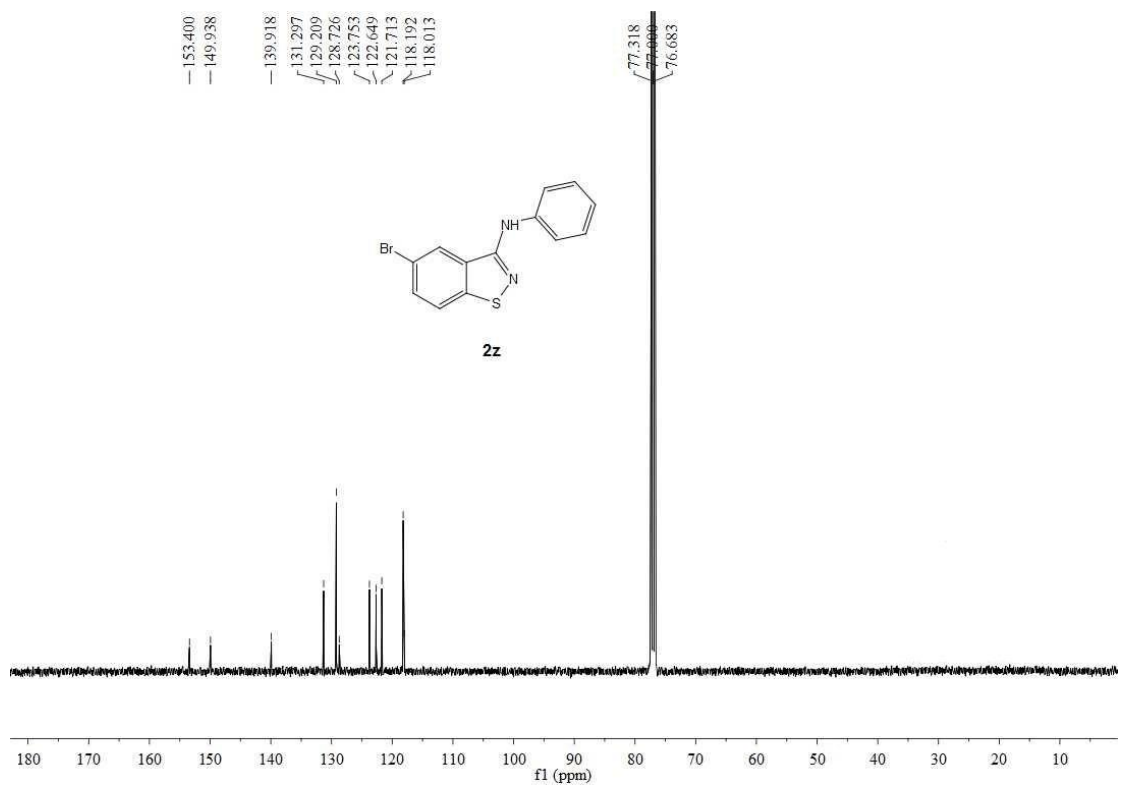

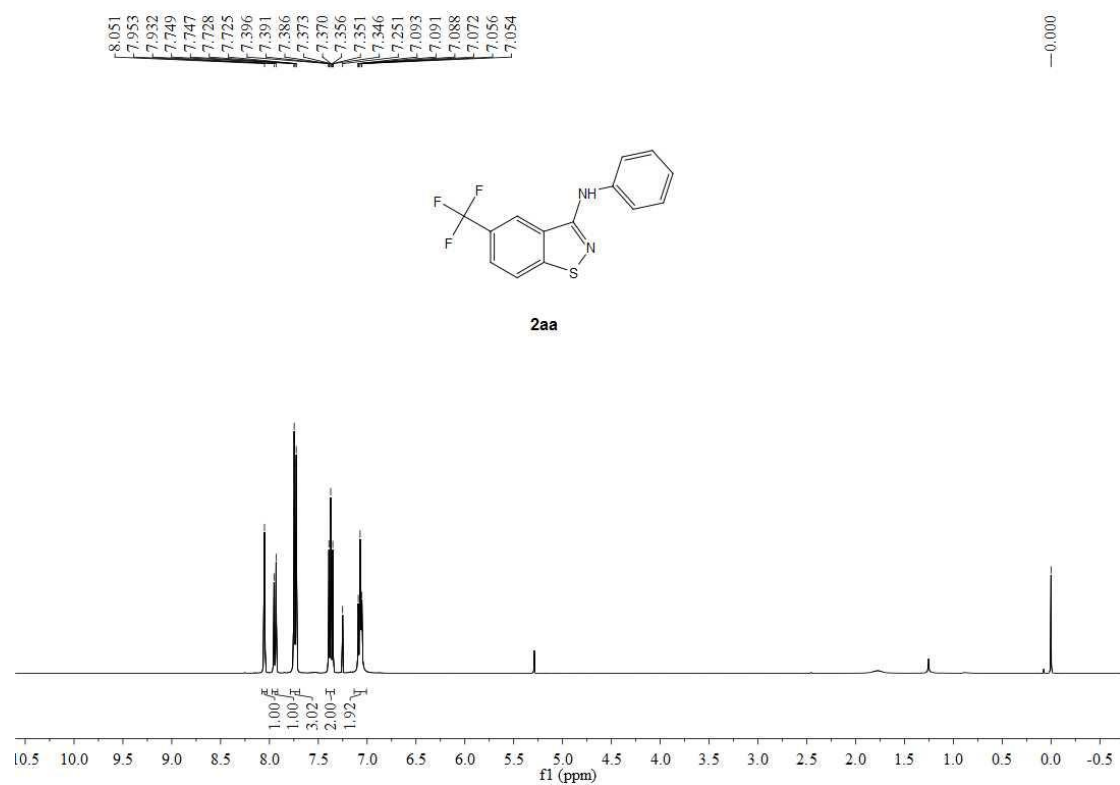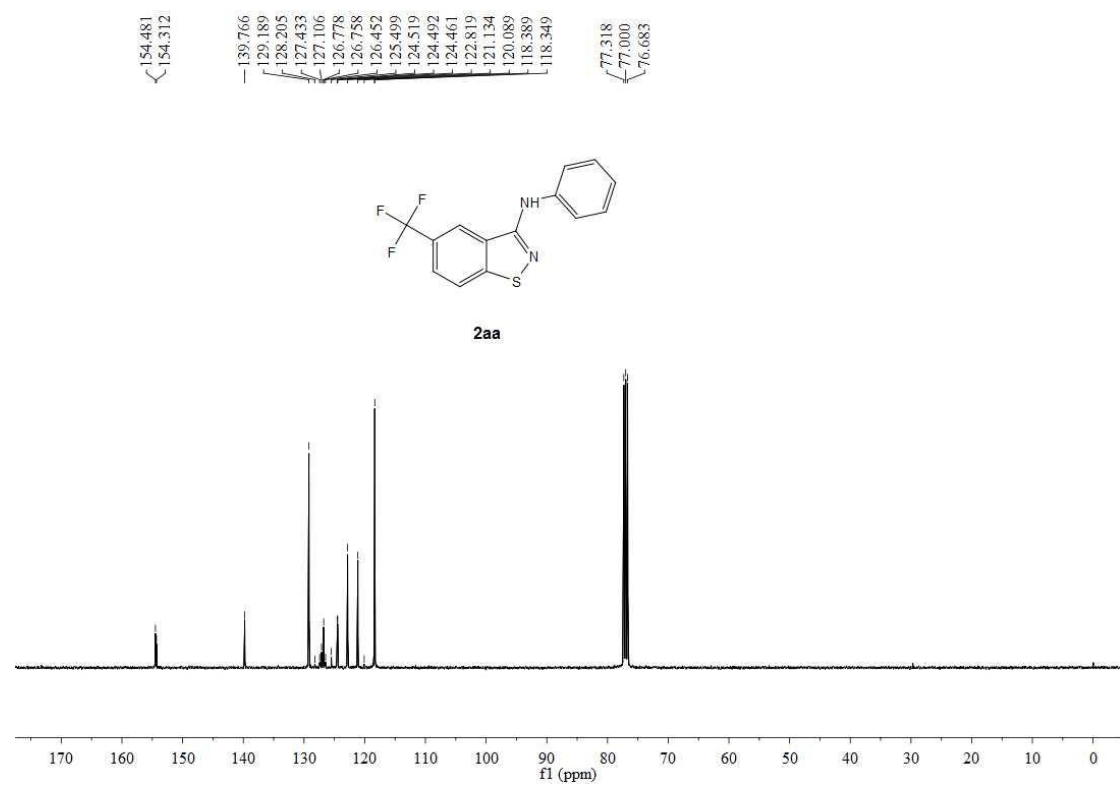

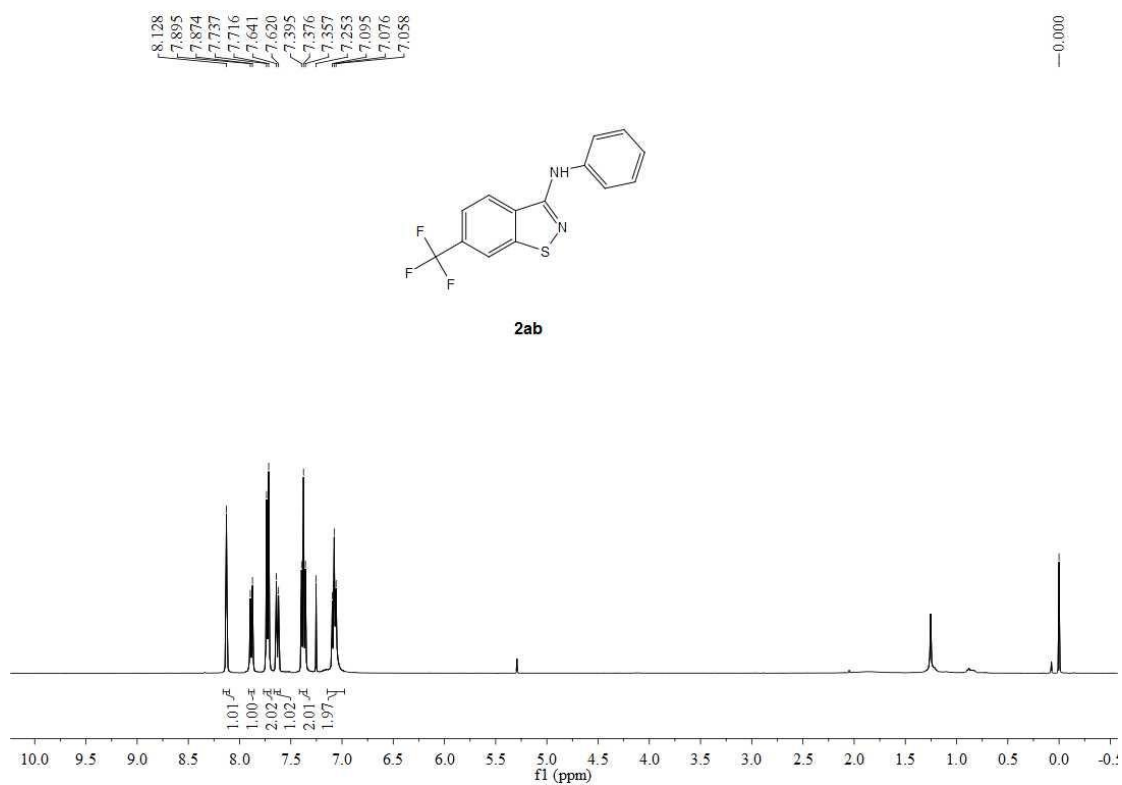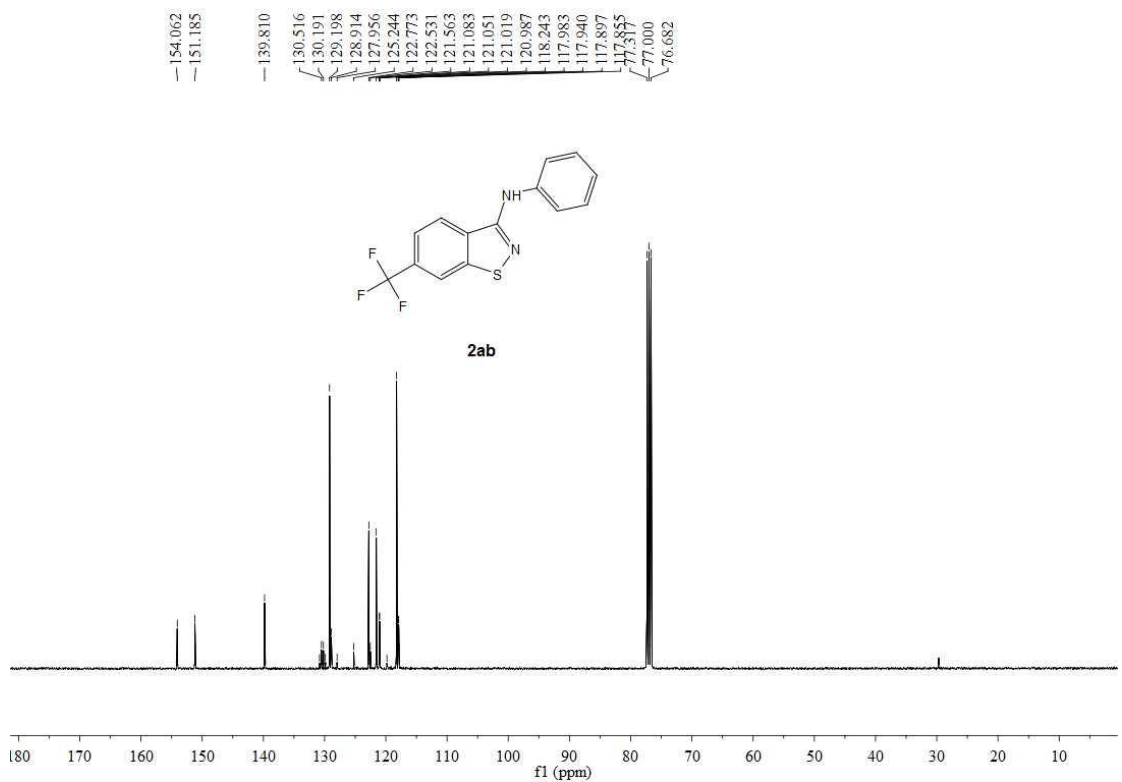

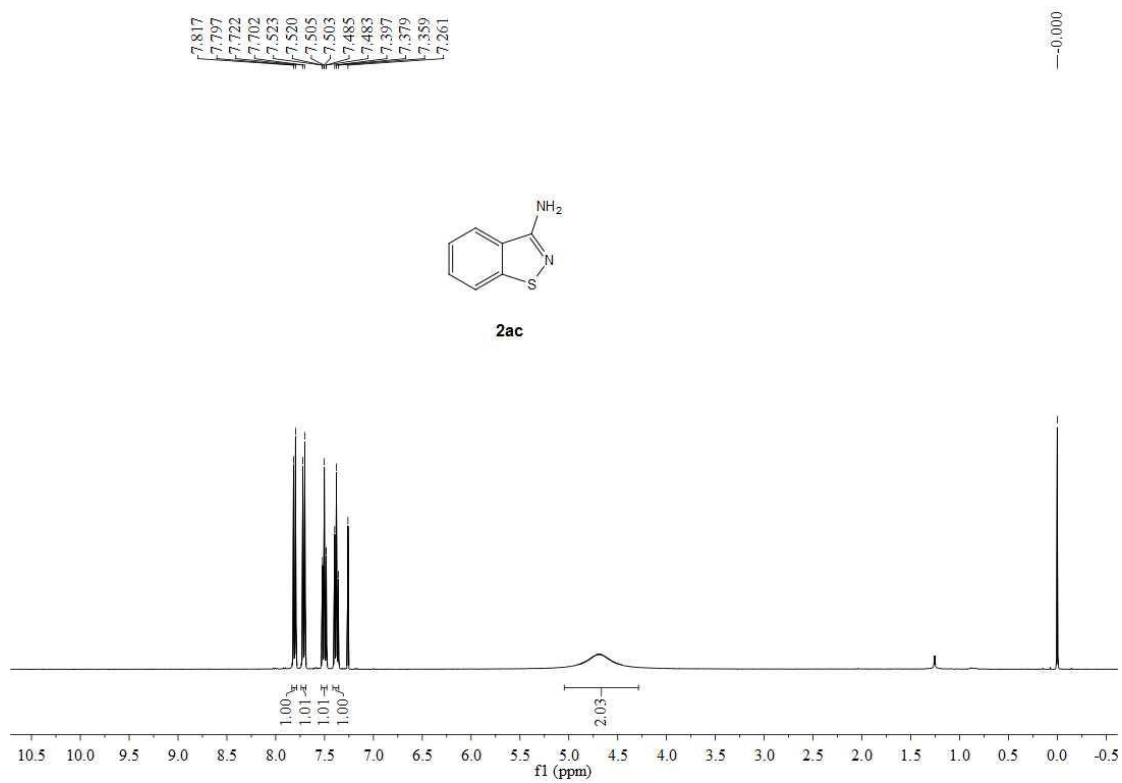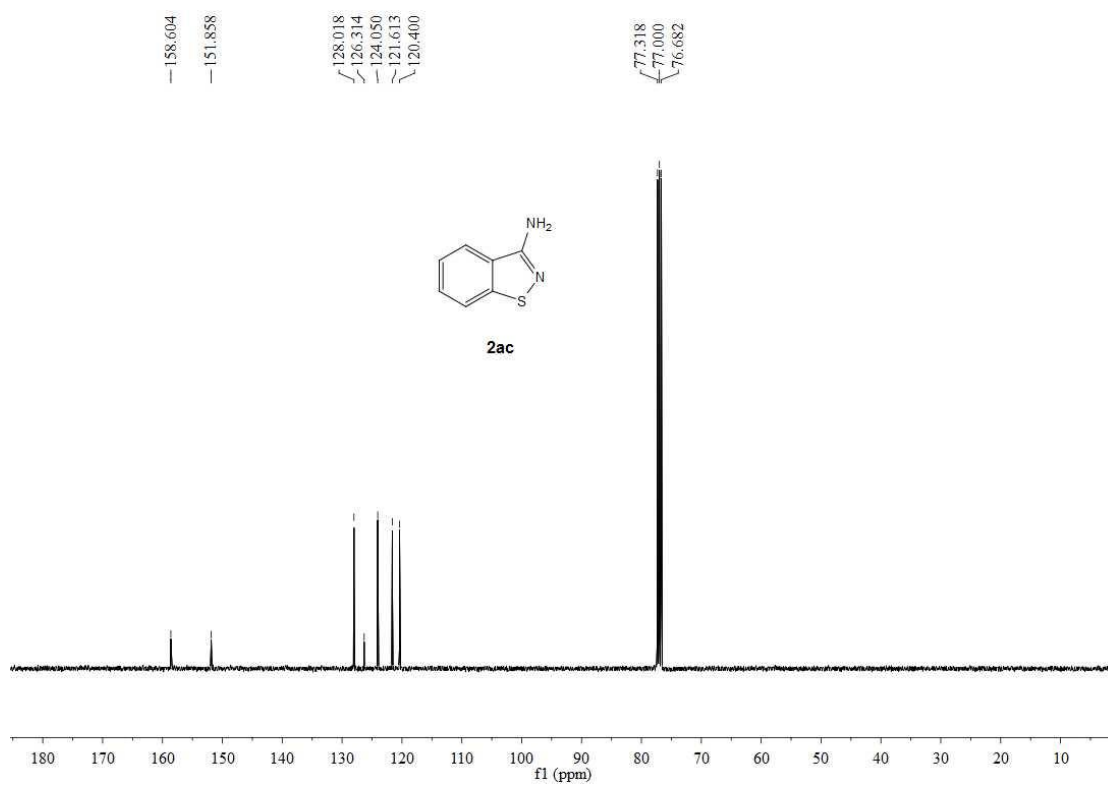

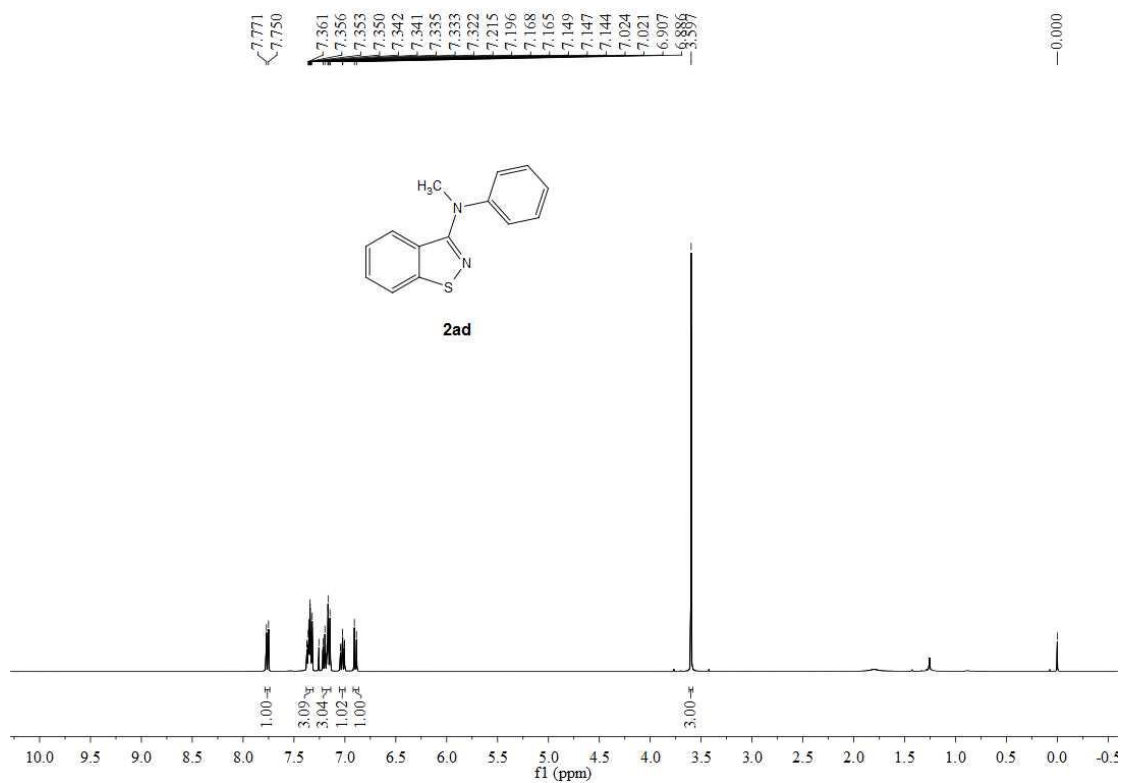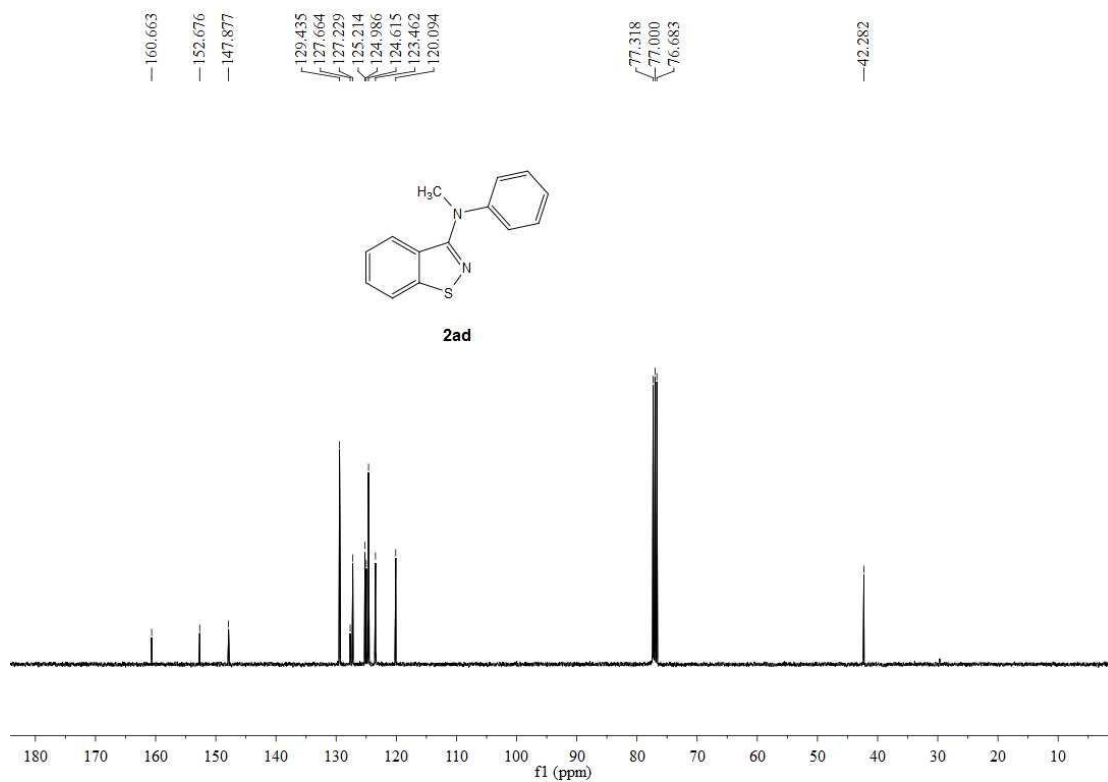



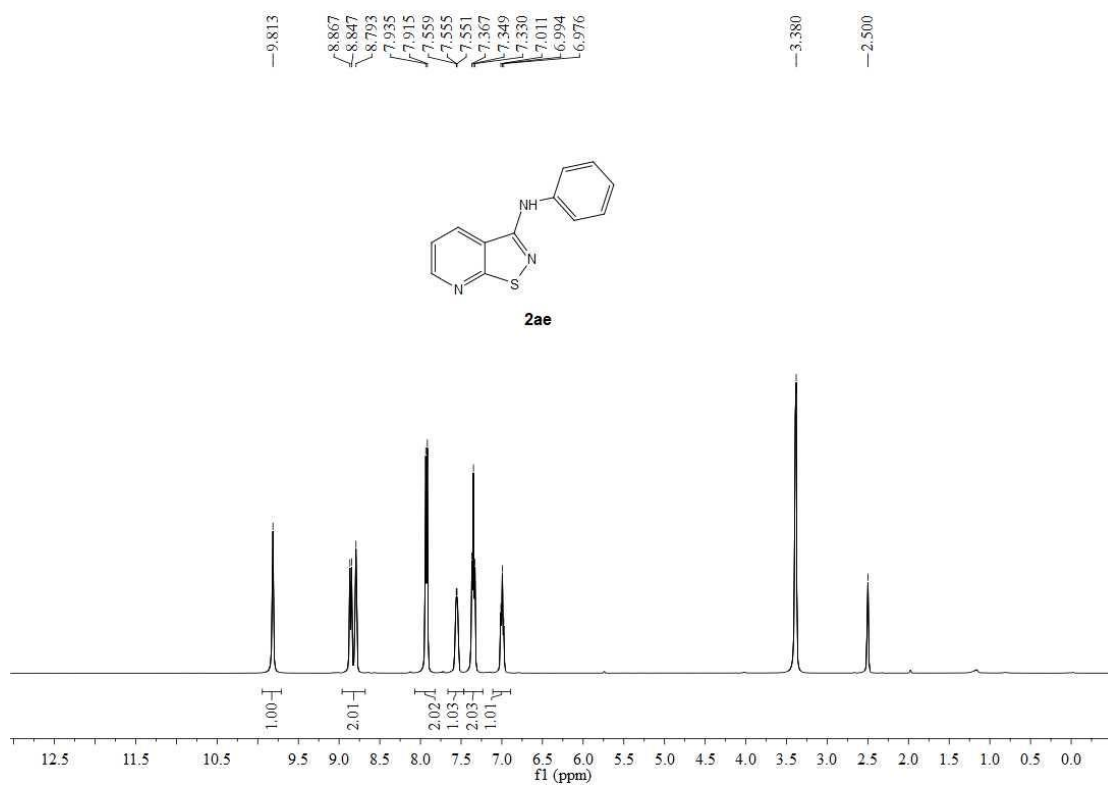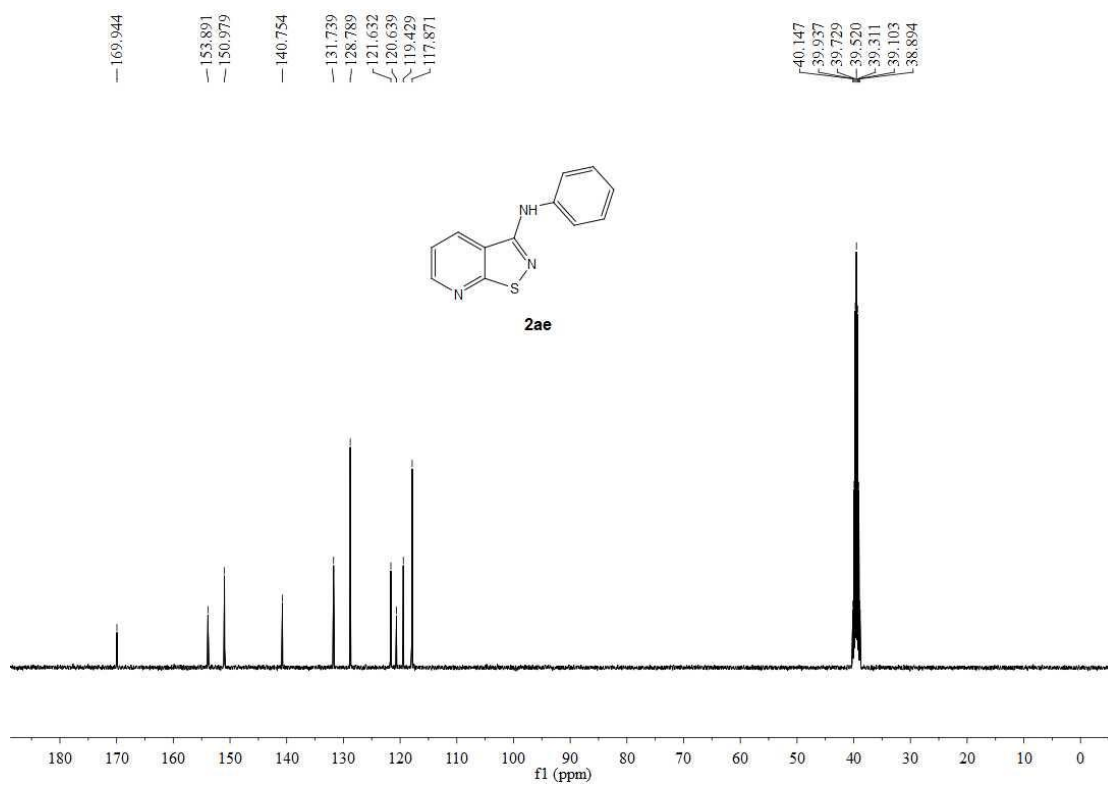

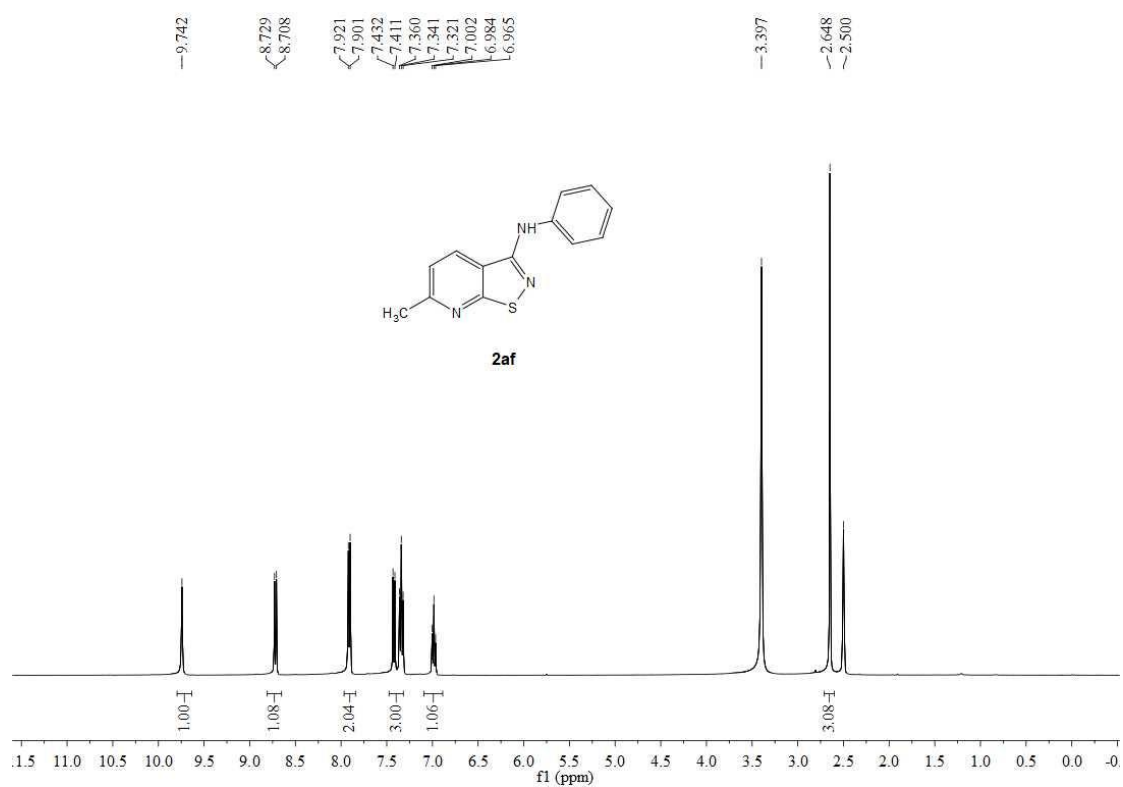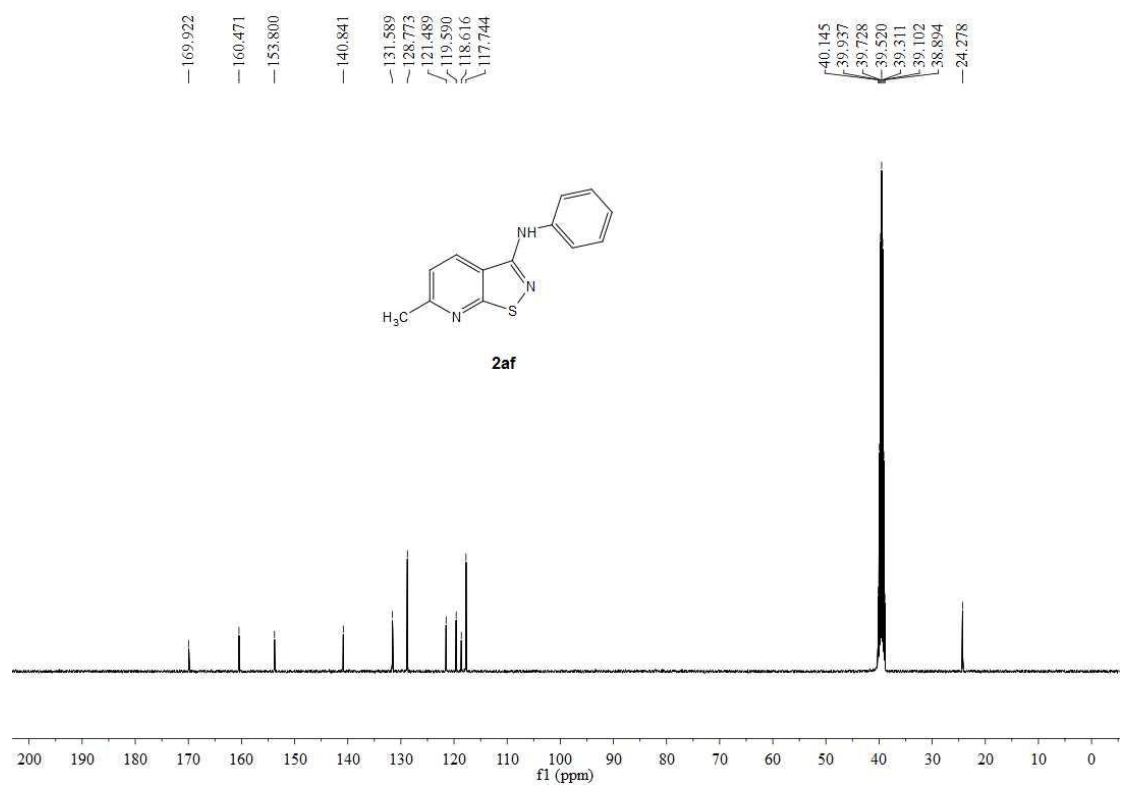

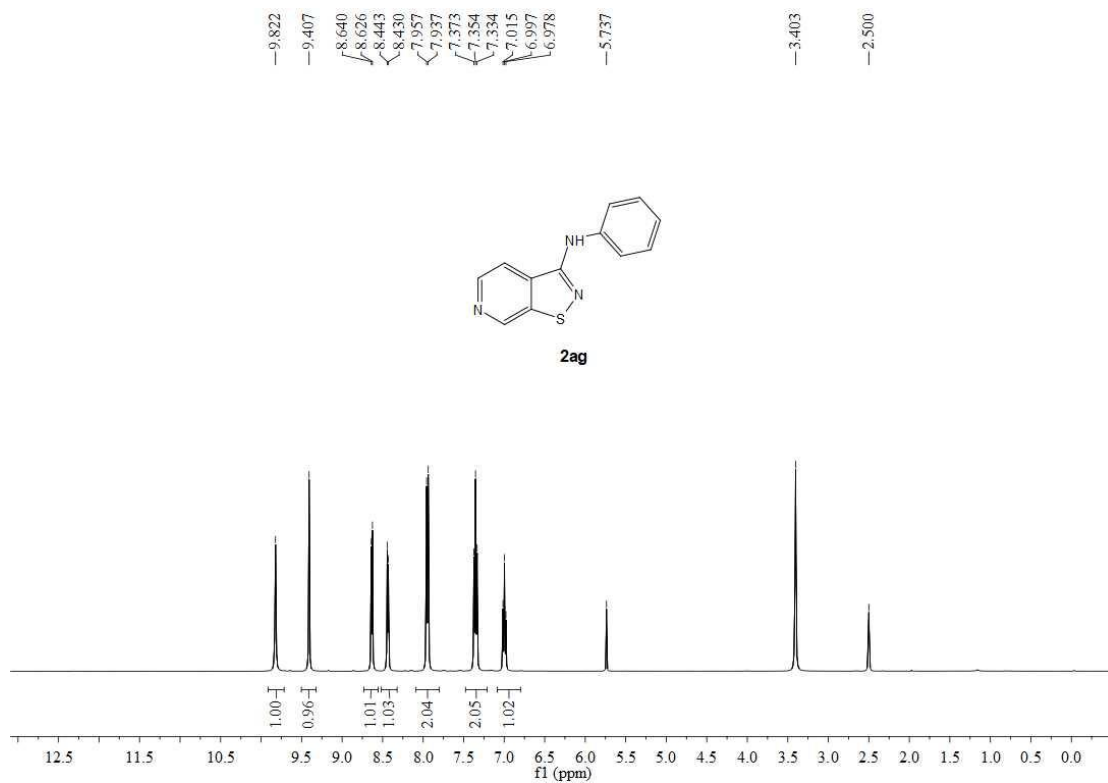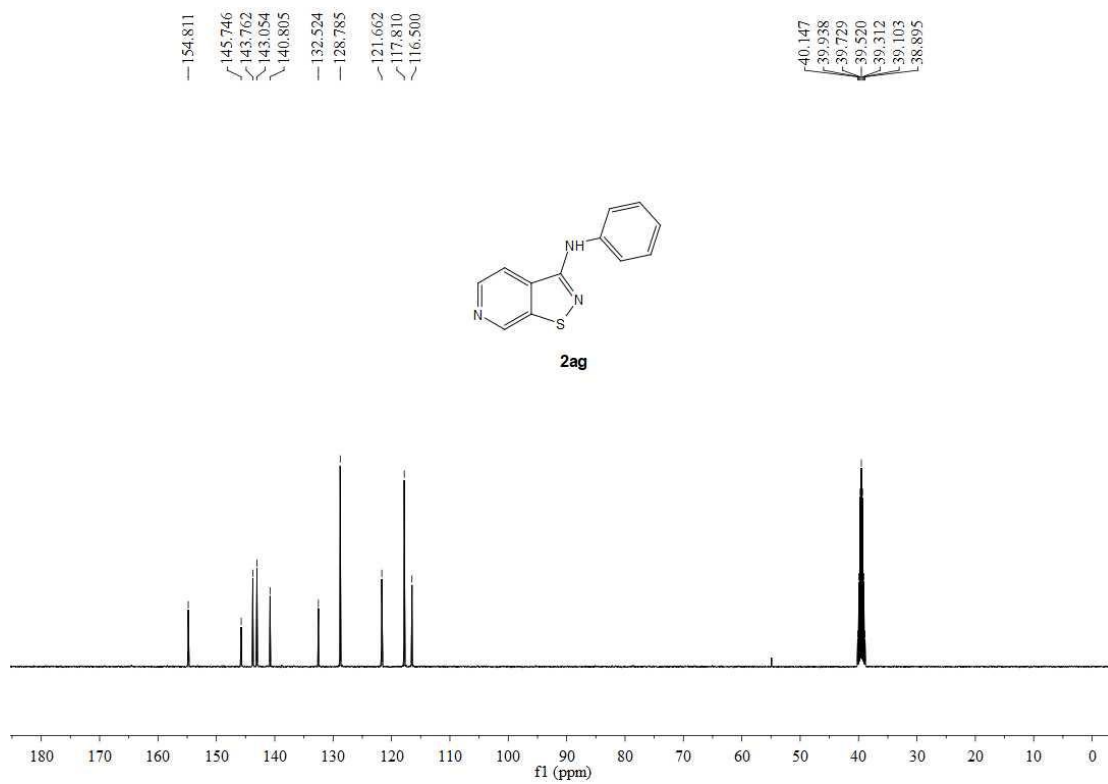

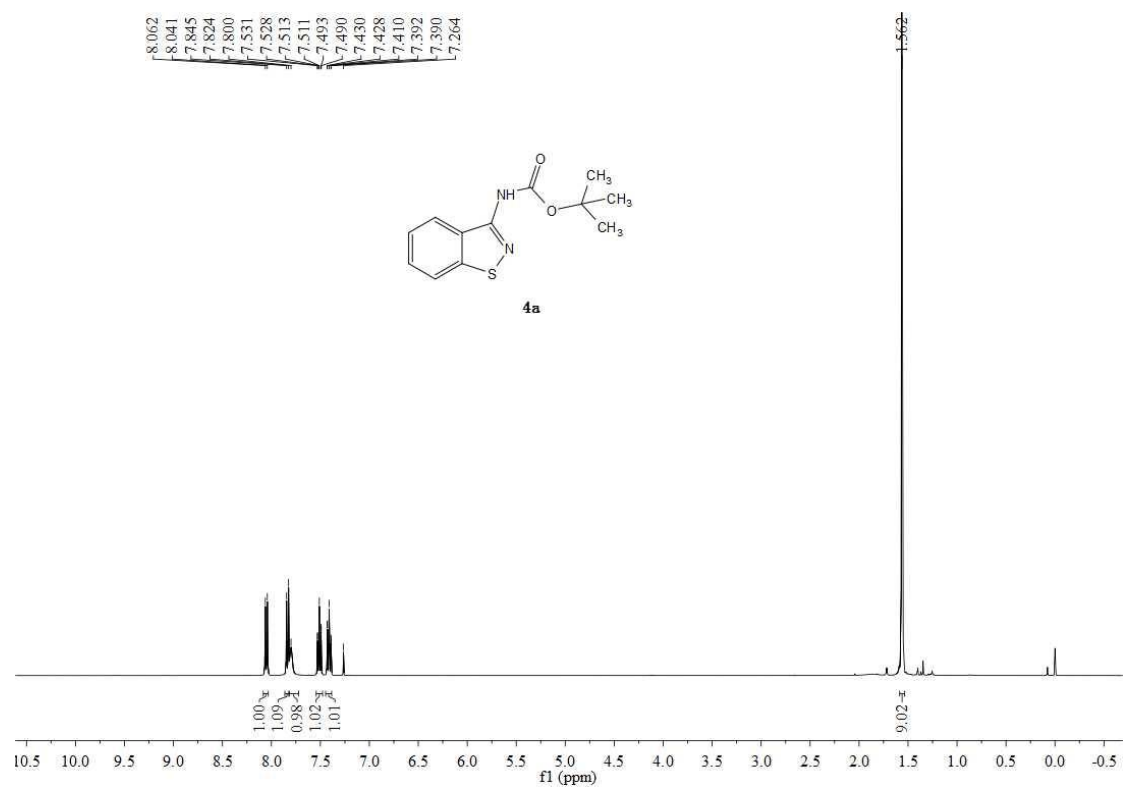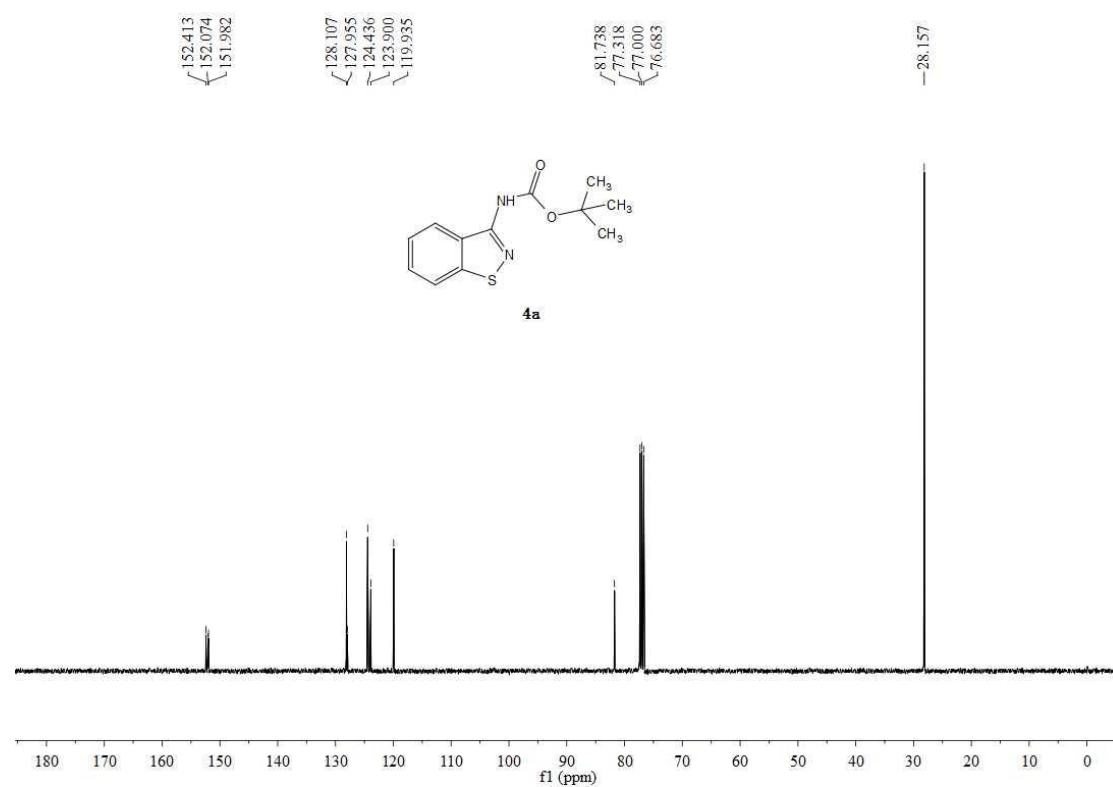

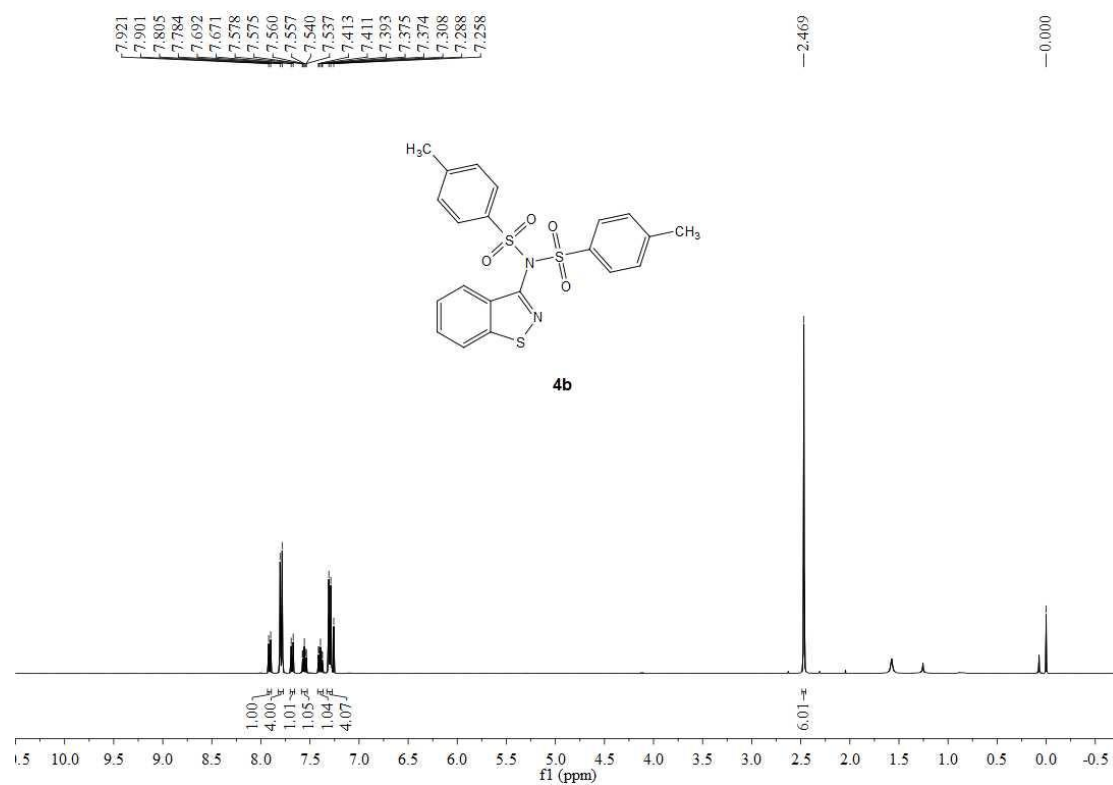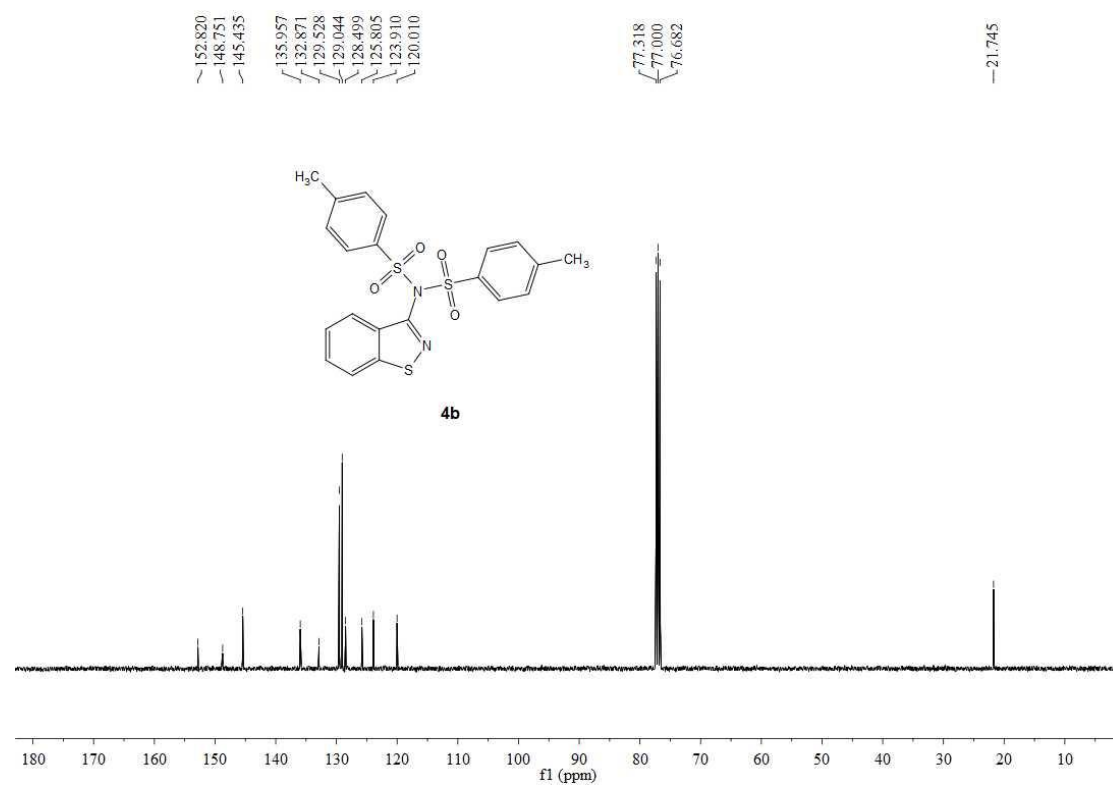

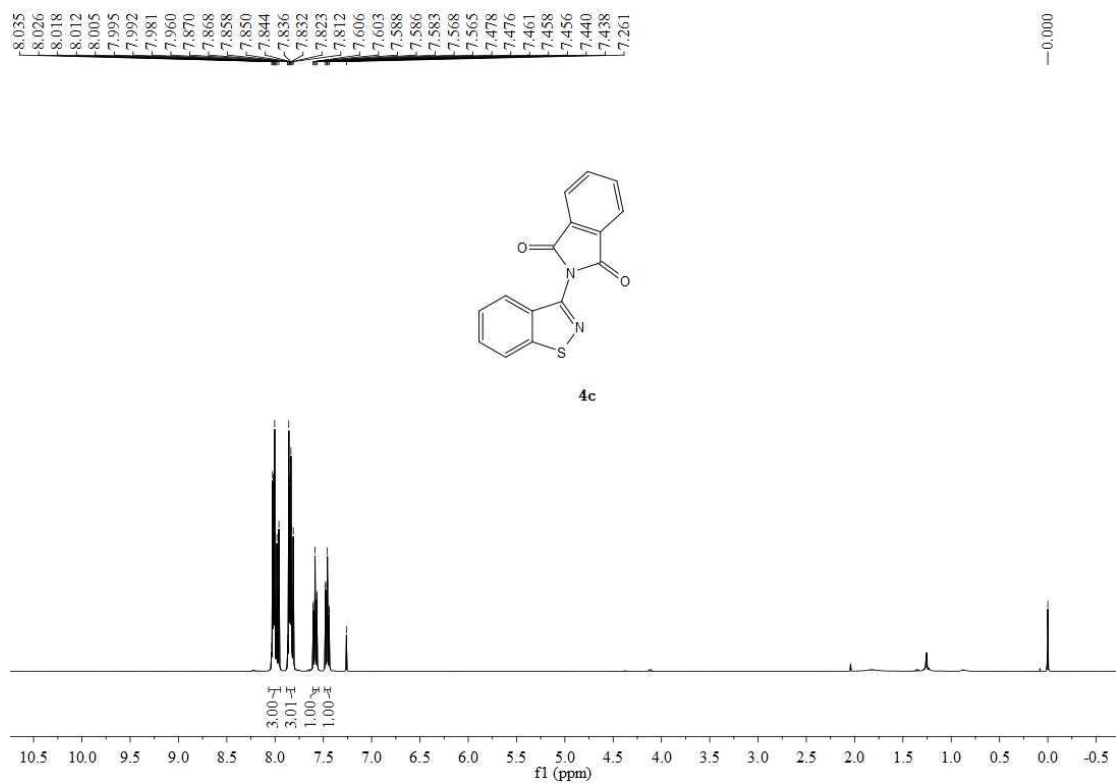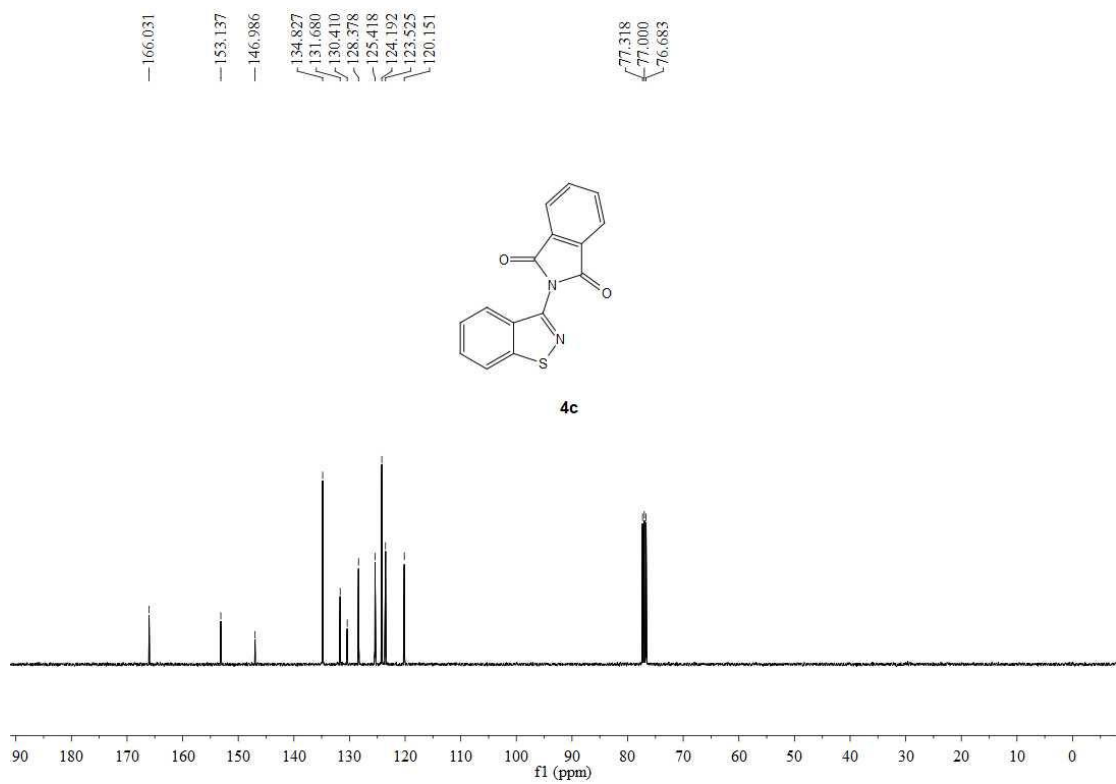

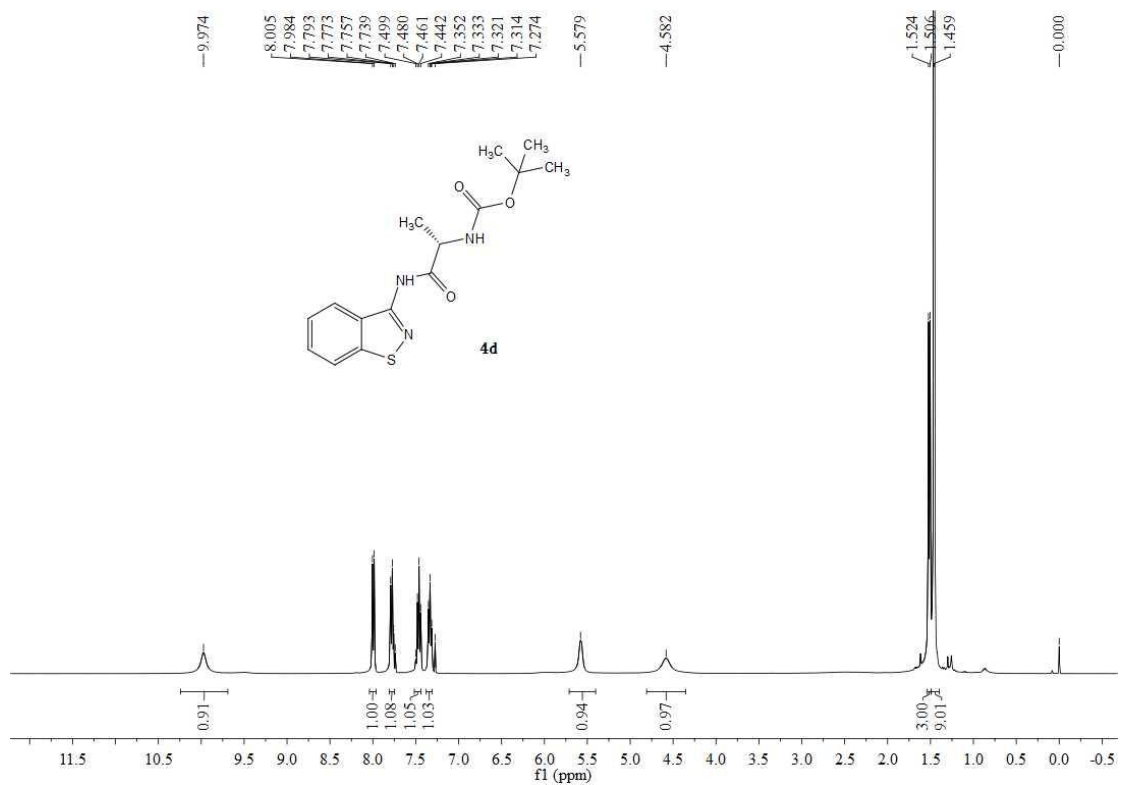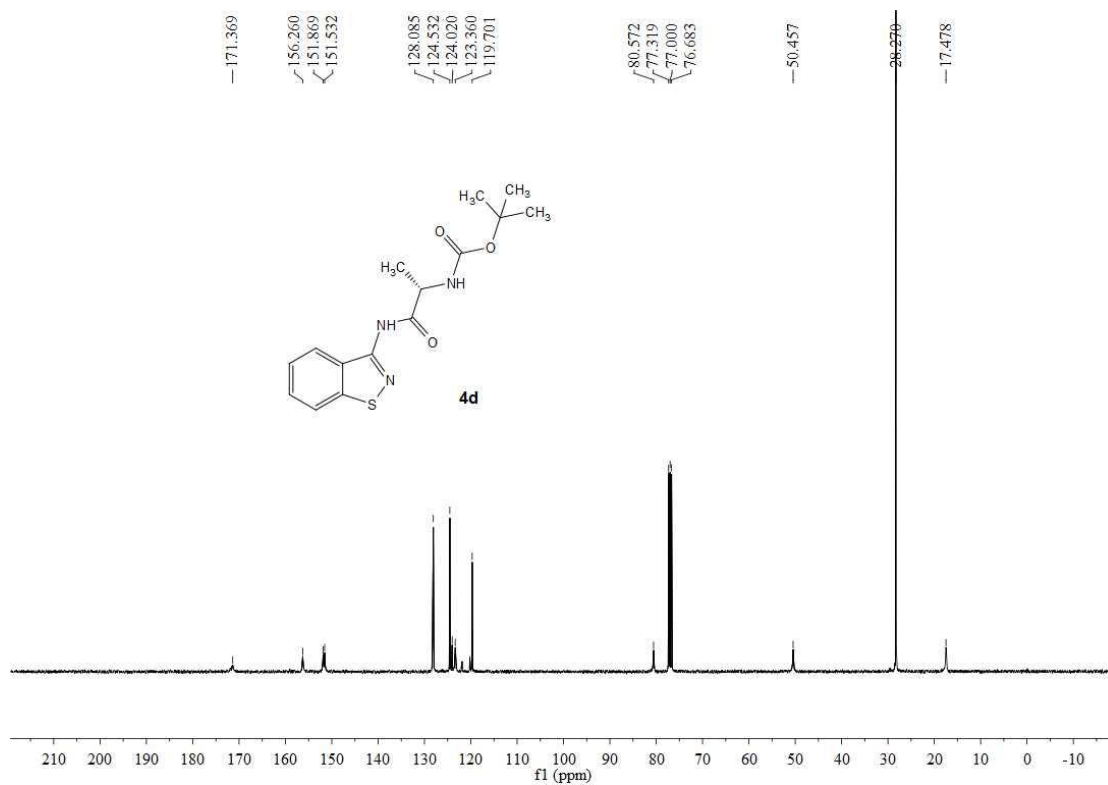

Supplement: c7gc03599c1.pdf [file c7gc03599c1.pdf]
